# Supplementary material for: The long road of functional recruitment—The evolution of a gene duplicate to pyrrolizidine alkaloid biosynthesis in the morning glories (Convolvulaceae)
Source: PubMed Central journal article supplement — Plant Direct. 2022 Jul 19;6(7):e420. doi: 10.1002/pld3.420 (PMC9295680; doi:10.1002/pld3.420), 2022-07-19

## Supplemental figure 4. **Representations of the electrostatic surfaces of the homology models.**

Shown are the models of the A-B dimer and the A monomer from:

- *Ipomoea neei* DHS & HSS
- *Ipomoea alba* DHS & HSS
- *Camonea umbellata* DHS & HSS
- *Distimake quinquefolius* individuum 1 and 2, DHS & HSS

The substrate tunnel entrance is highlighted in the models of *I. neei* DHS (slide 2 and slide 12). Positively and negatively charged regions are denoted as blue and red, respectively.

*Ipomoea neei* DHS

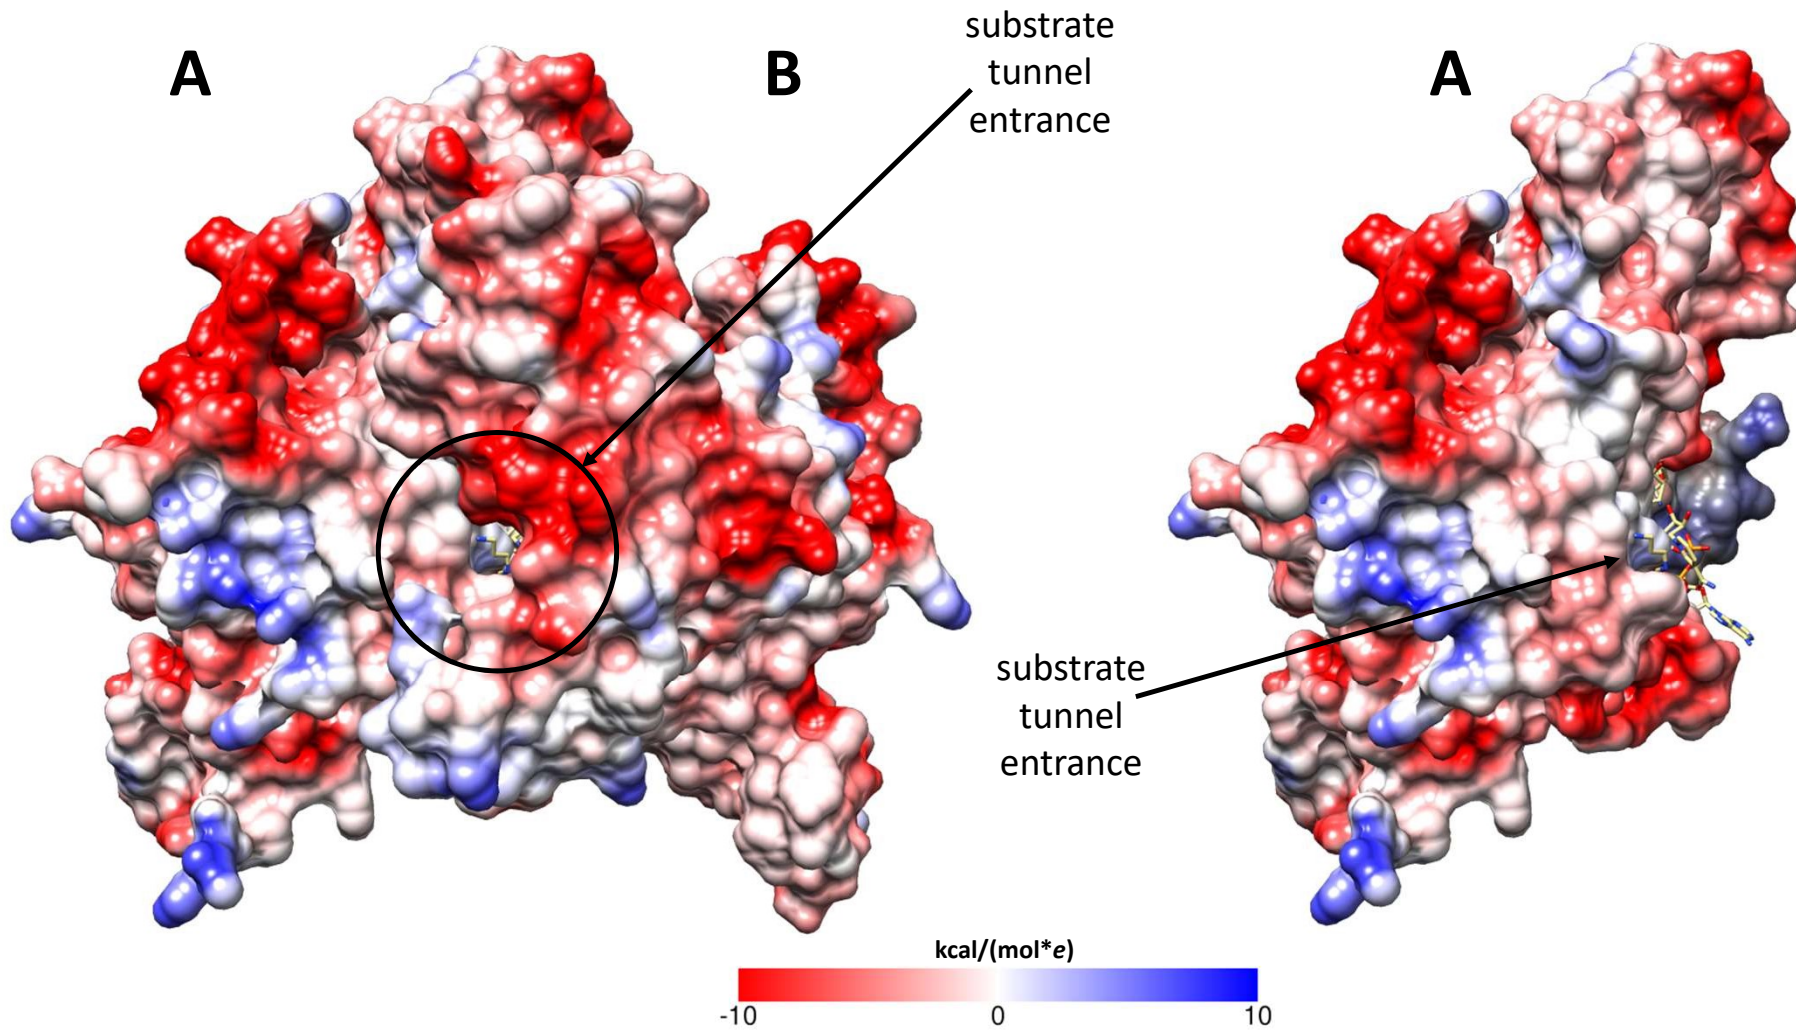

*Ipomoea neei* HSS

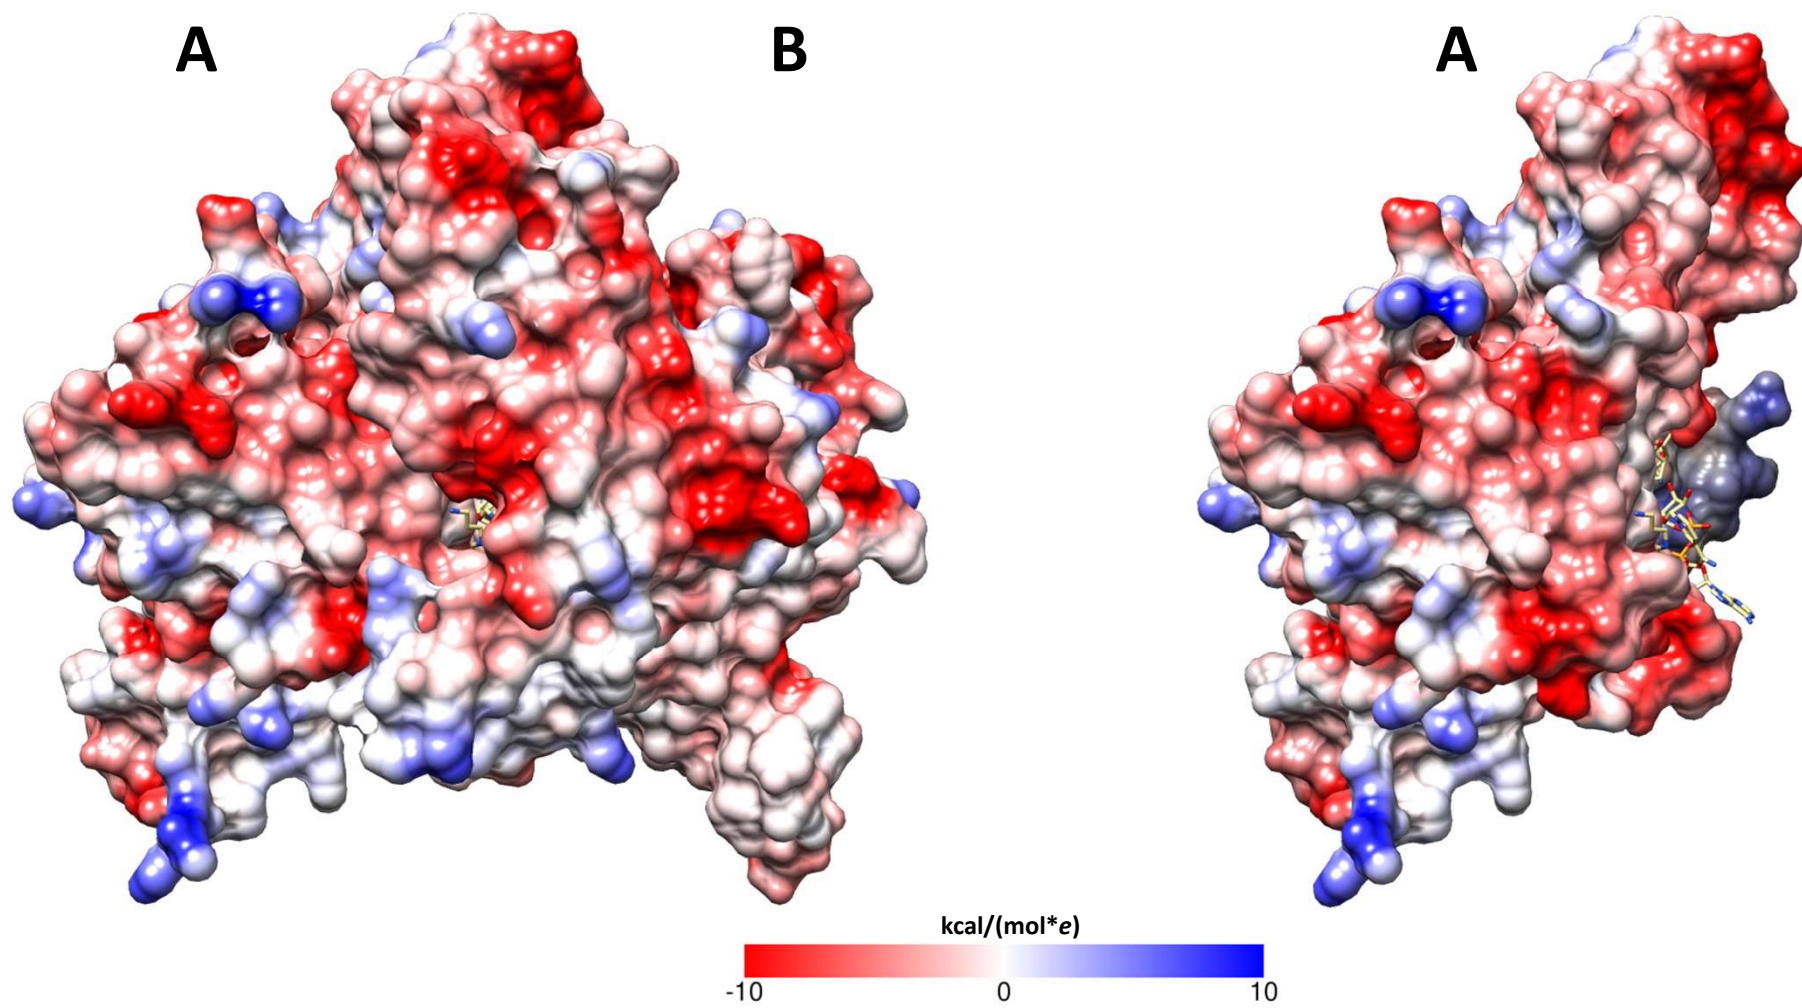

*Ipomoea alba* DHS

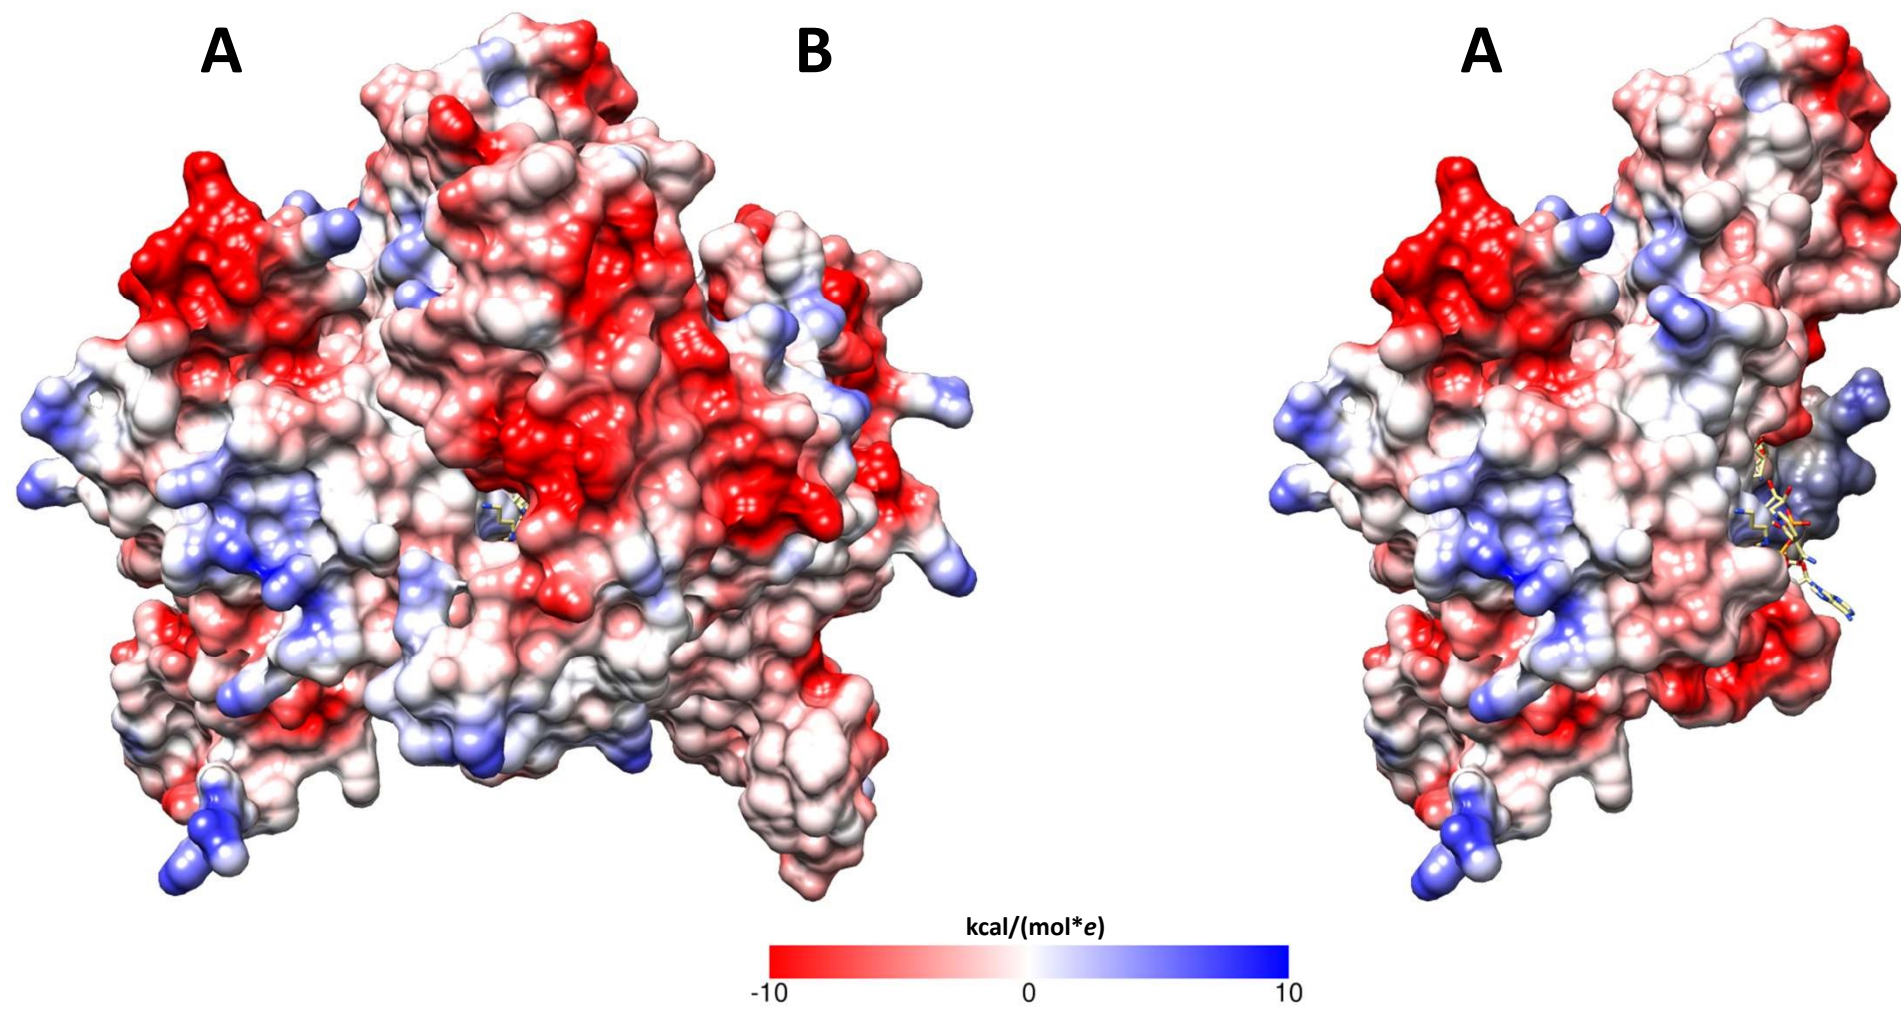

*Ipomoea alba* HSS

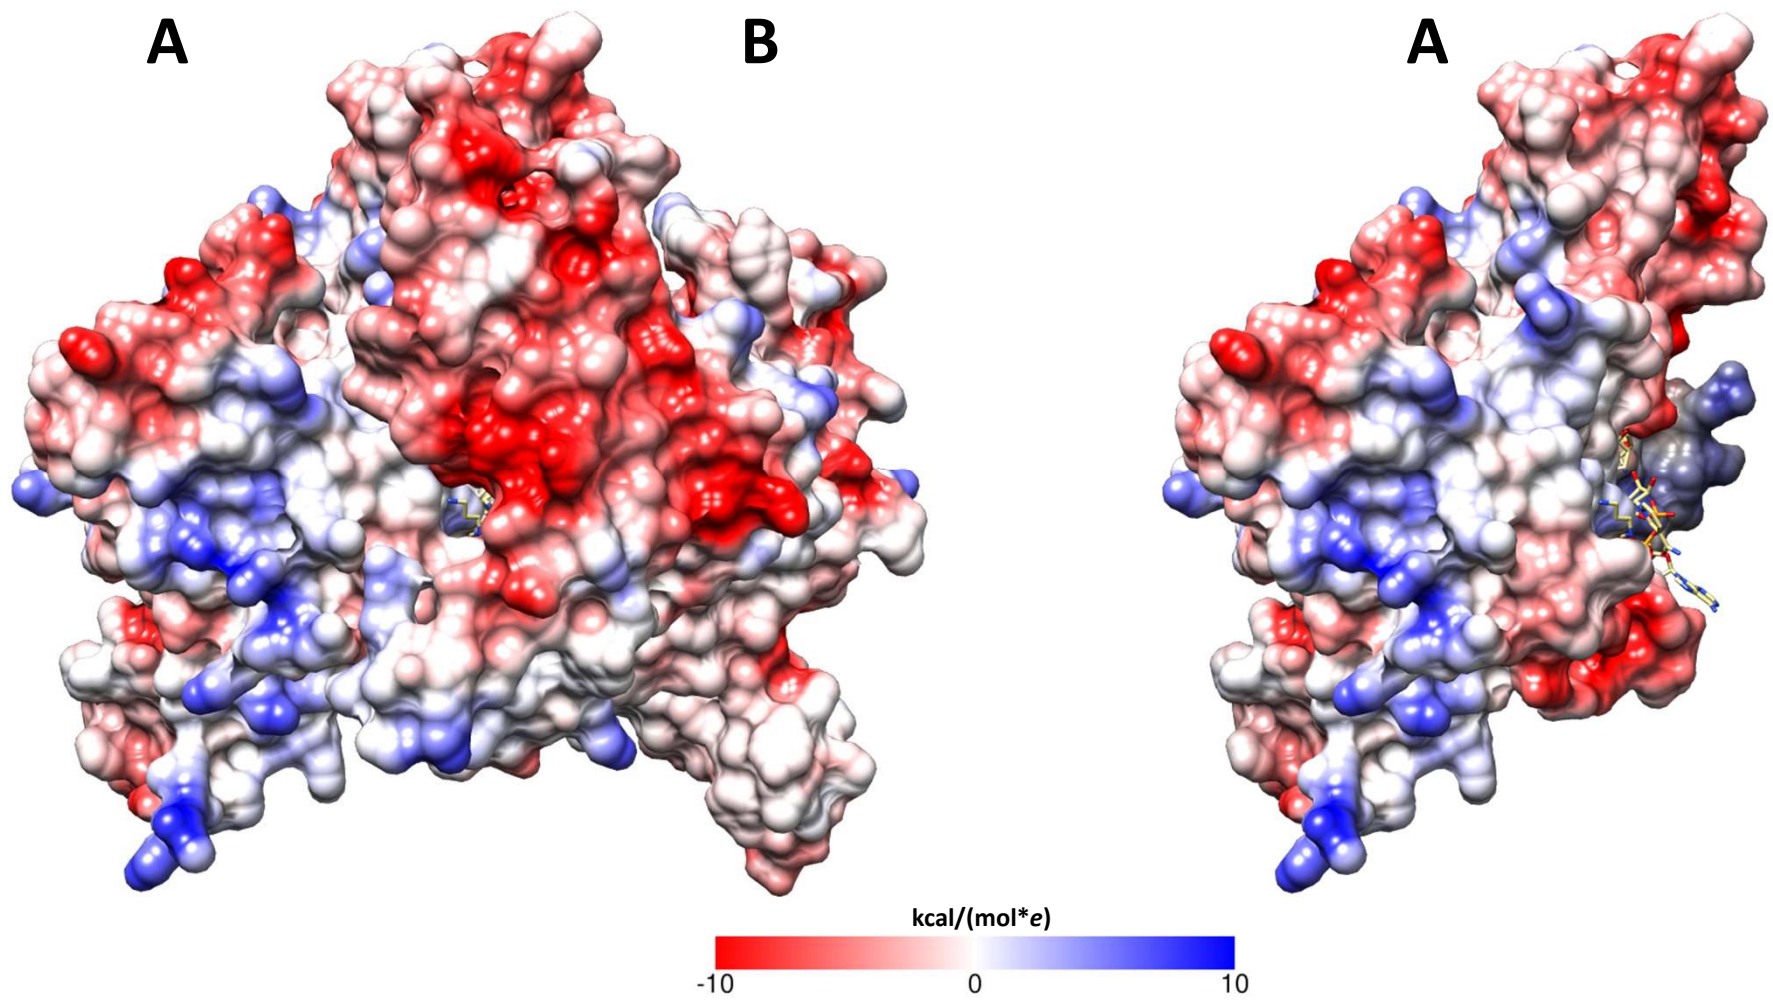

*Camonea umbellata* DHS

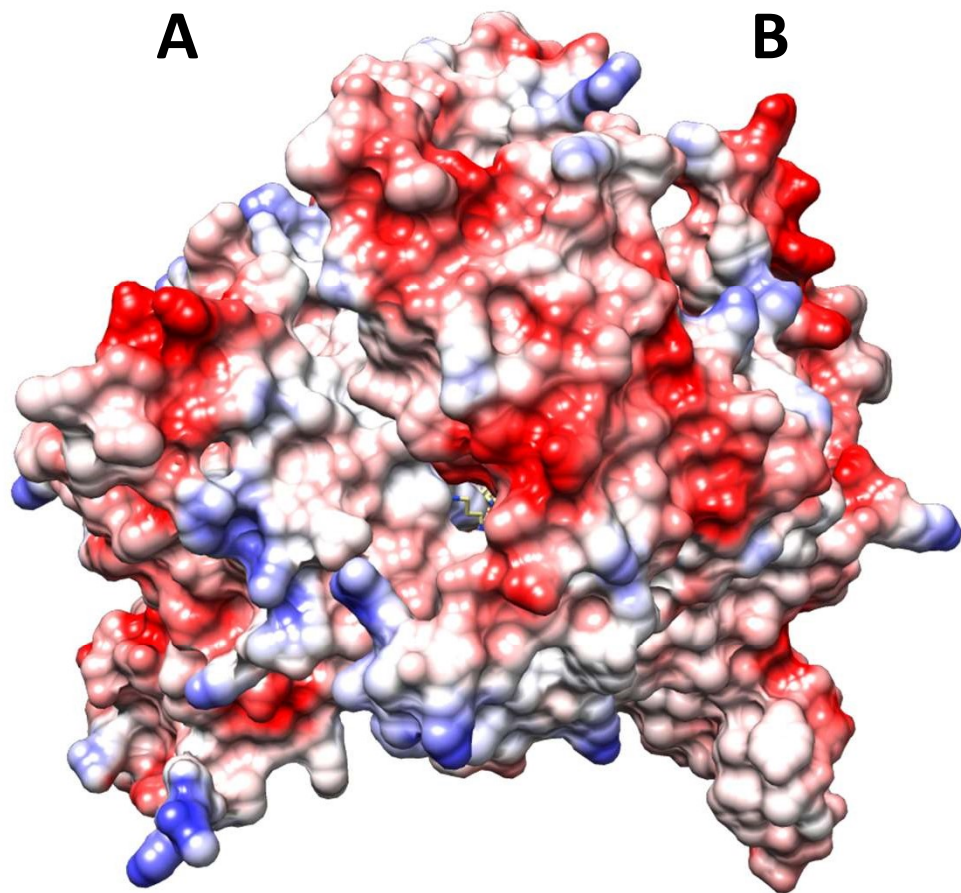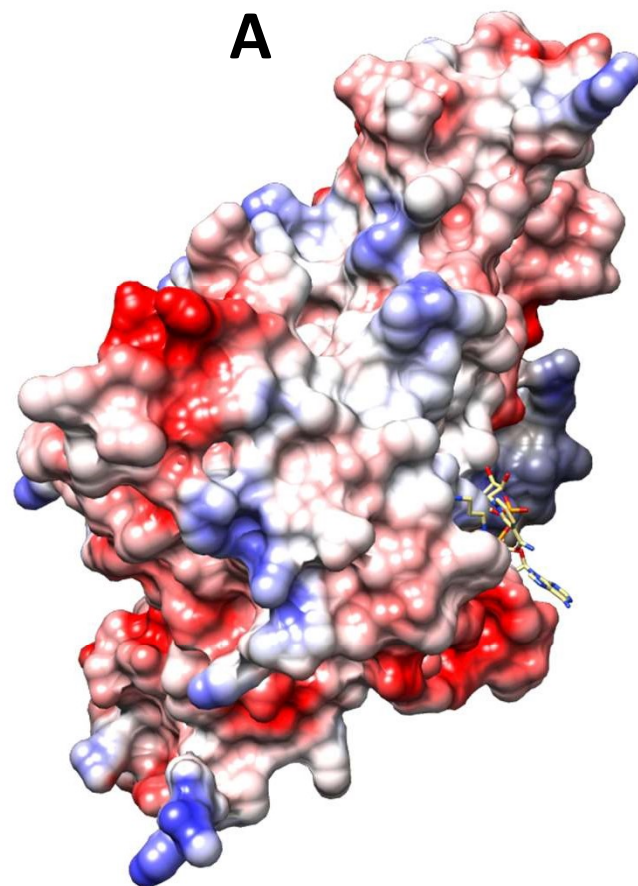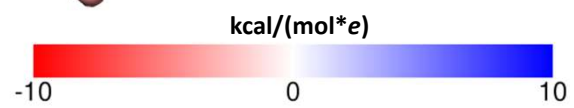

*Camonea umbellata* HSS

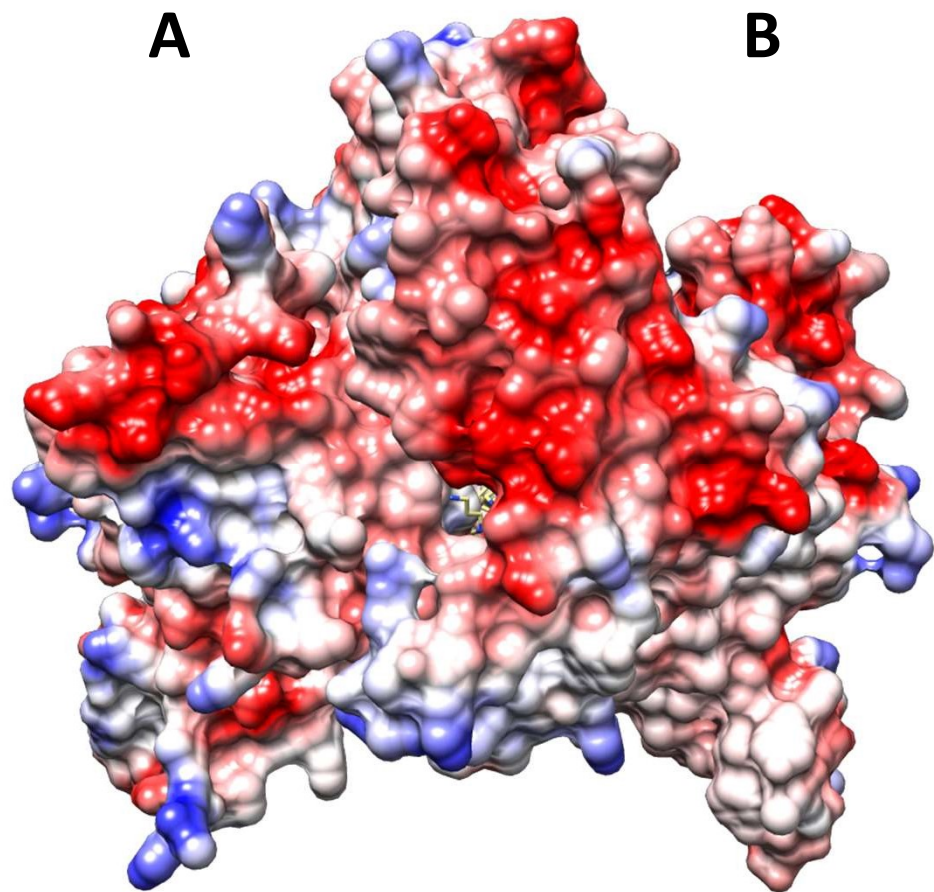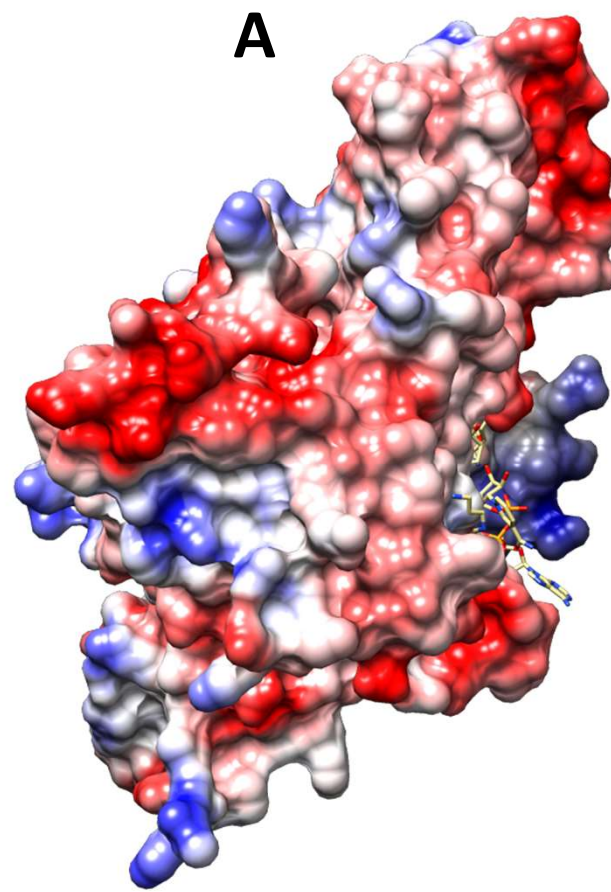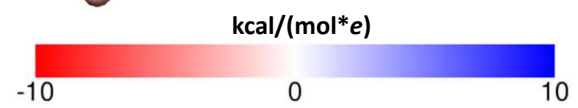

*Distimake quinquefolius* 1 DHS

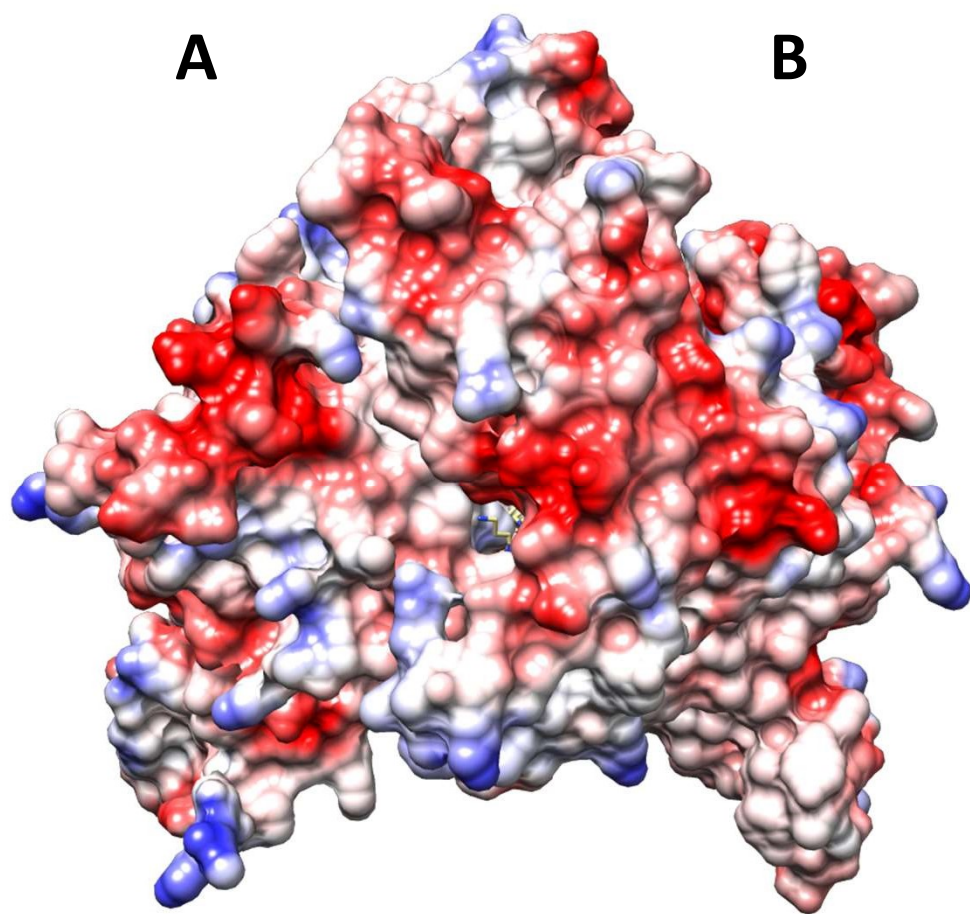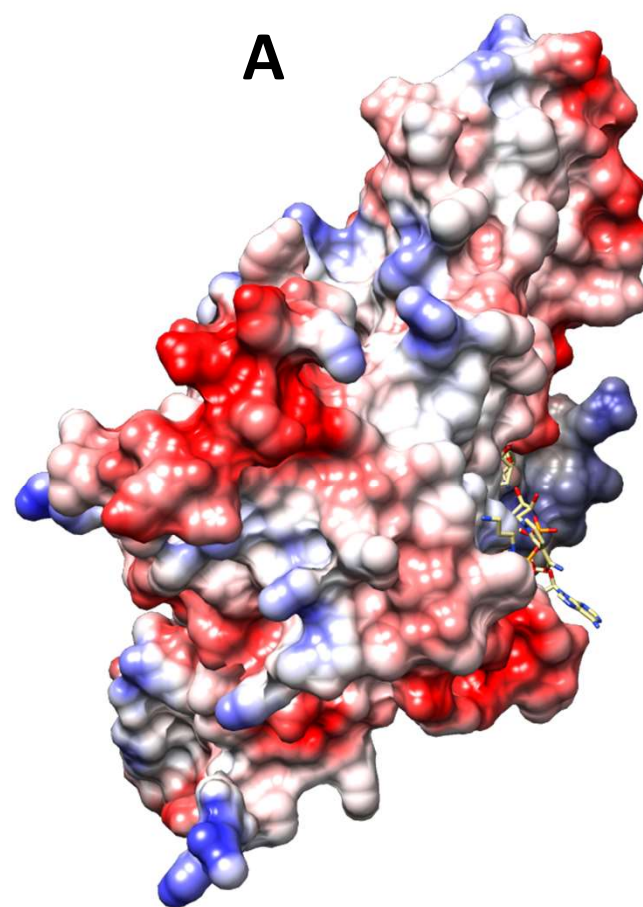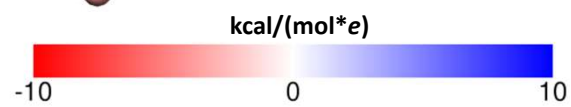



*Distimake quinquefolius* 1 HSS

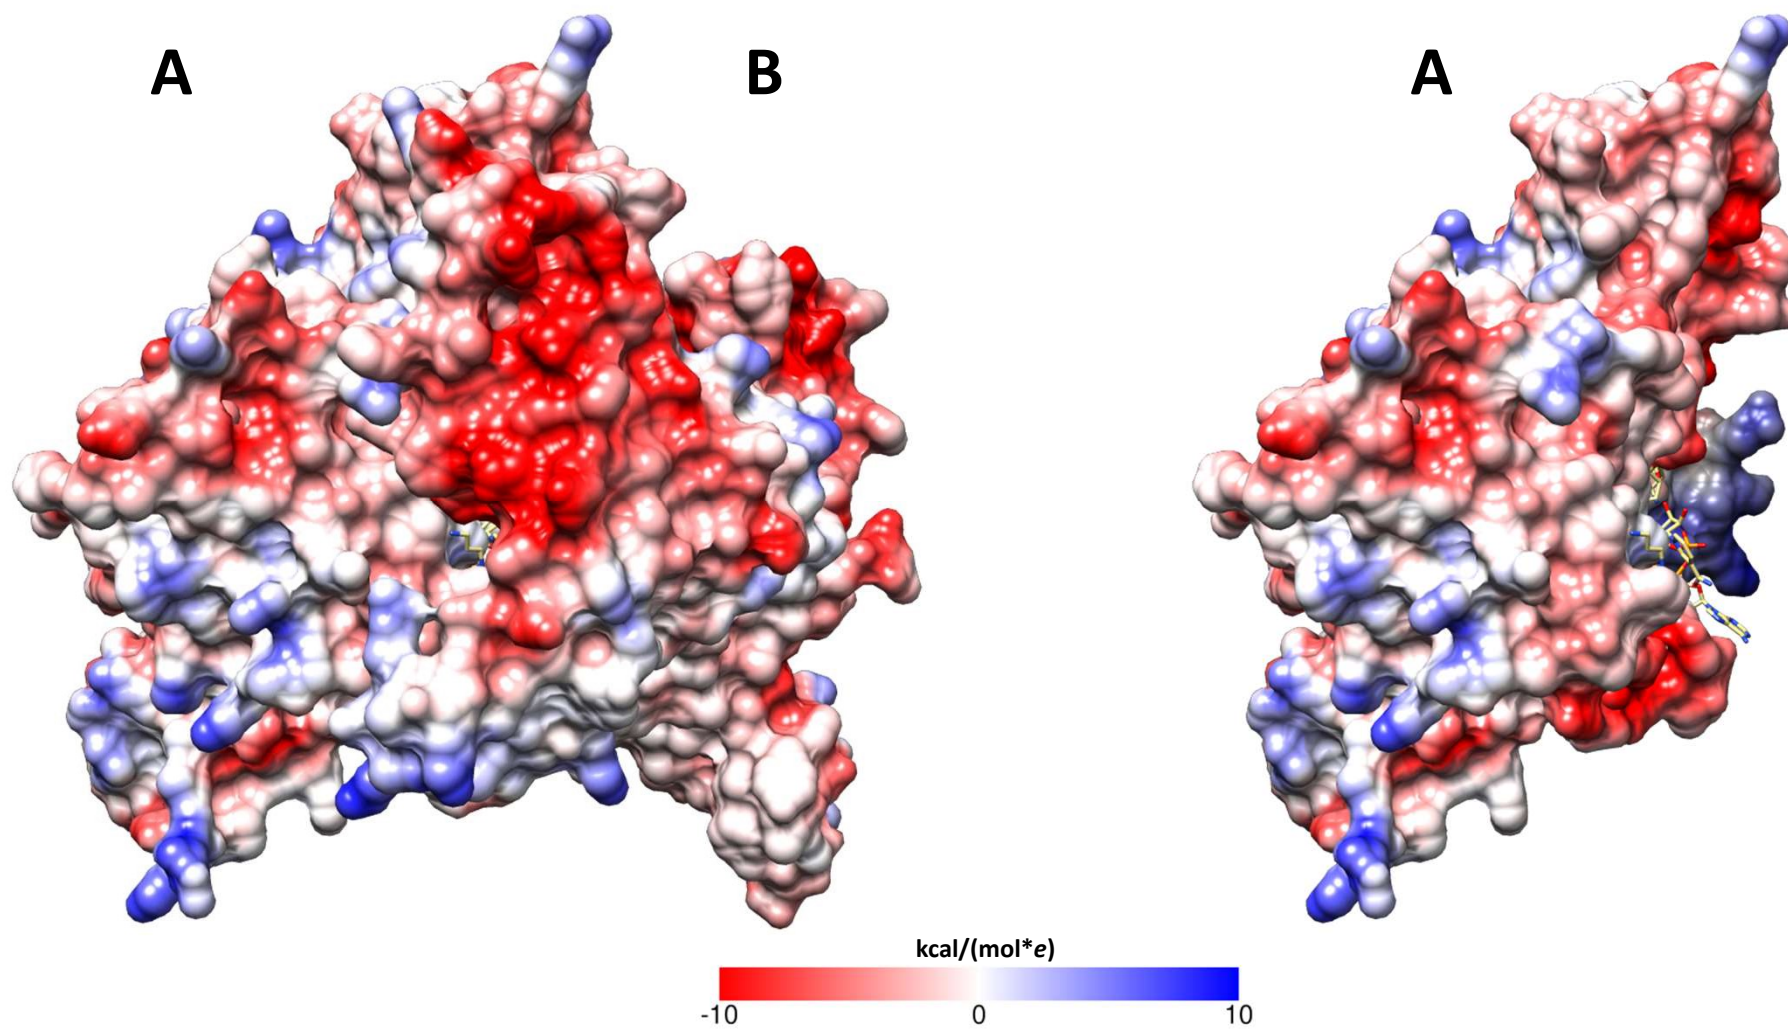

*Distimake quinquefolius* 2 DHS

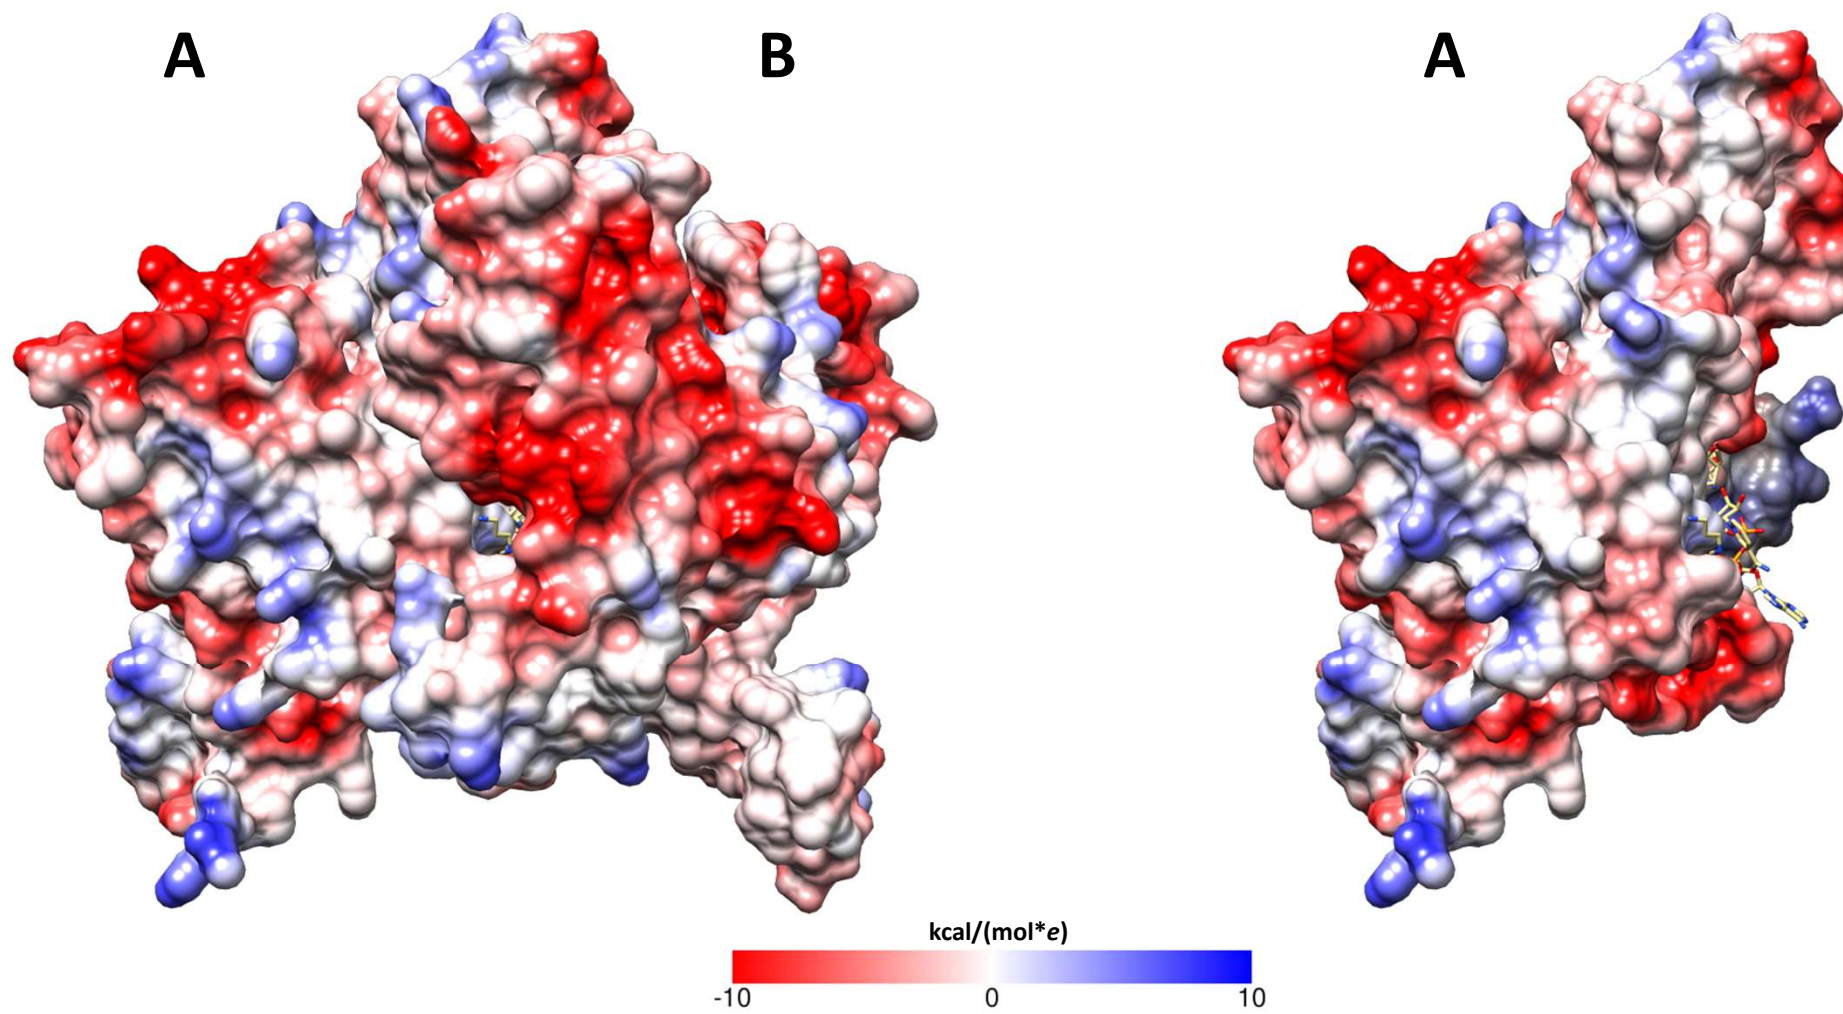

*Distimake quinquefolius* 2 HSS

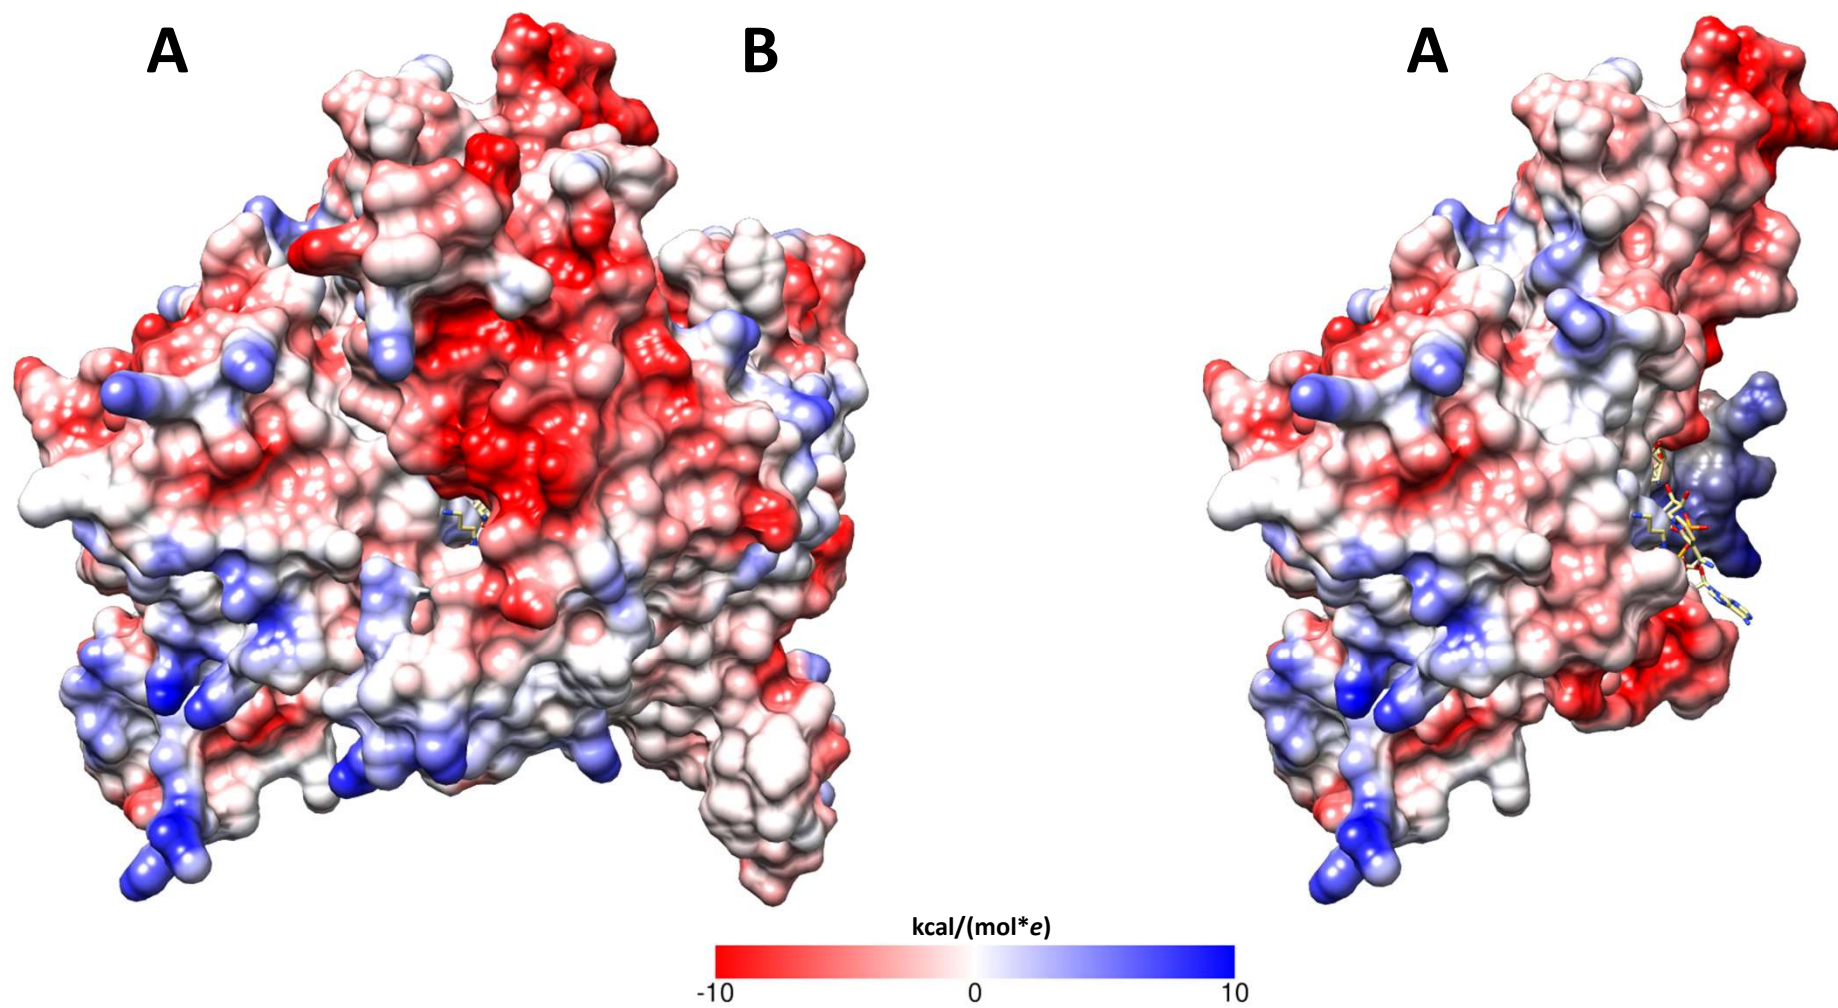

*Ipomoea neei* DHS

90°  
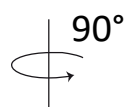

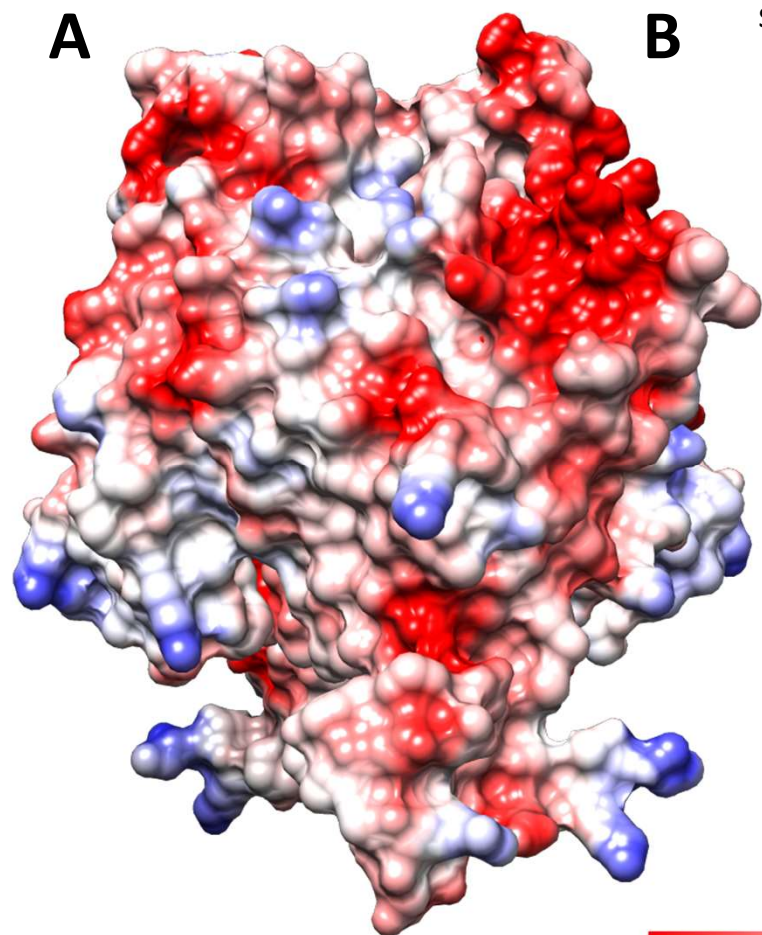

substrate  
tunnel  
entrance

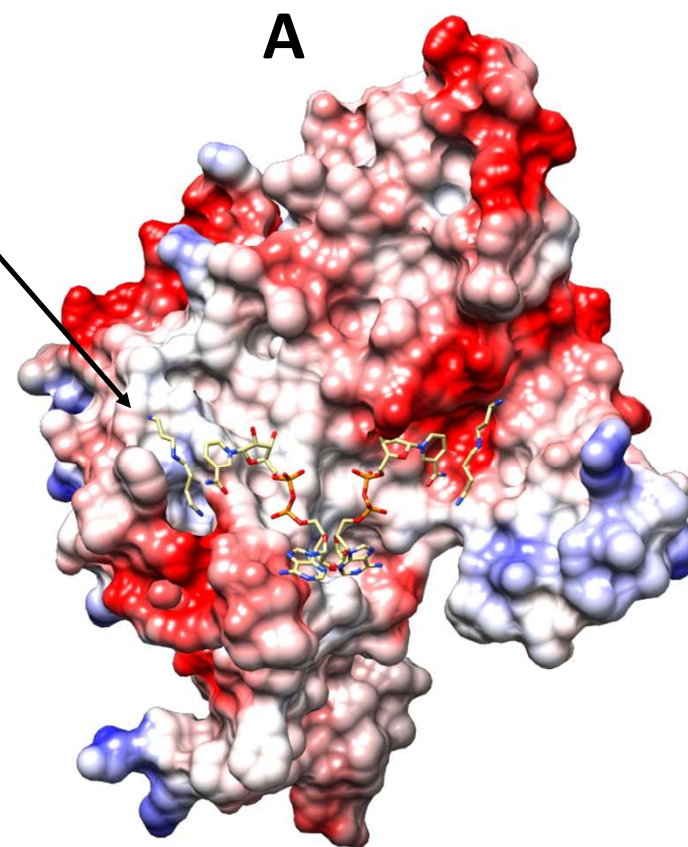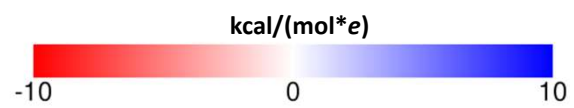

*Ipomoea neei* HSS

90°

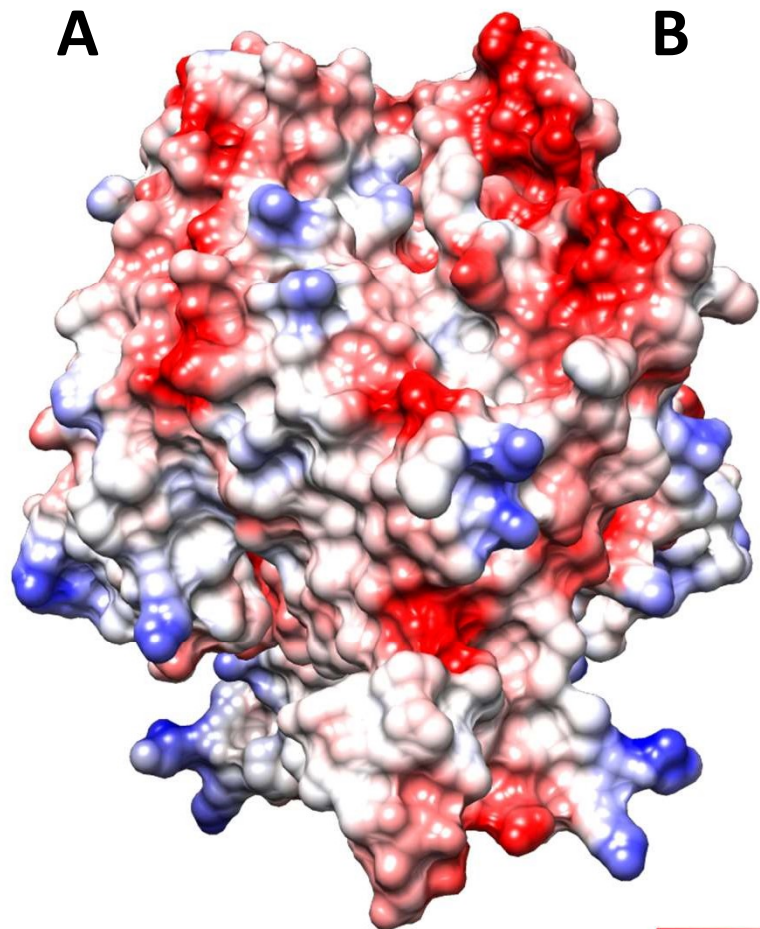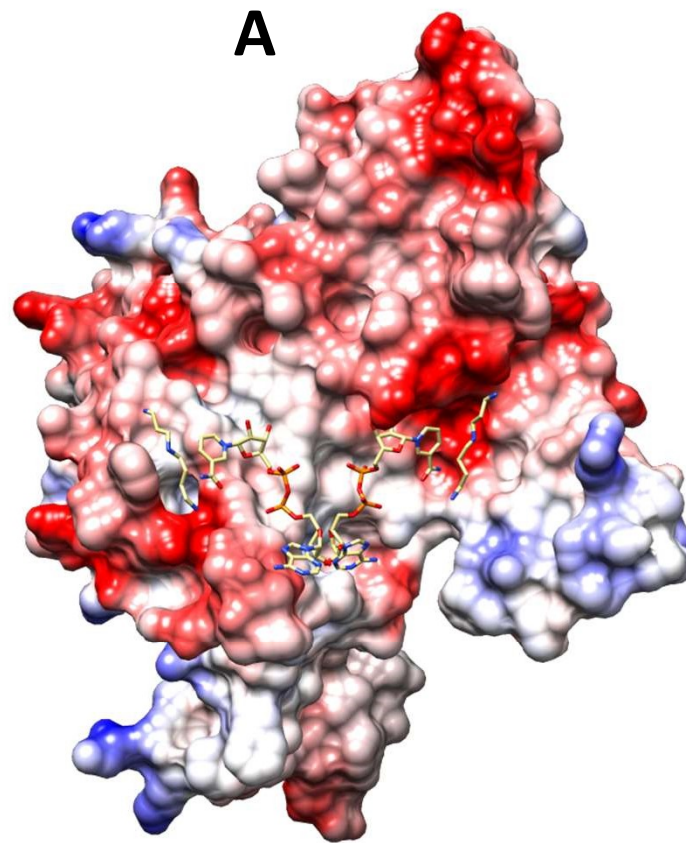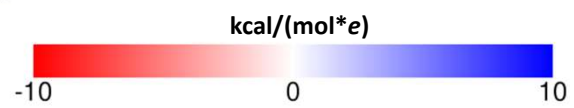

*Ipomoea alba* DHS

90°

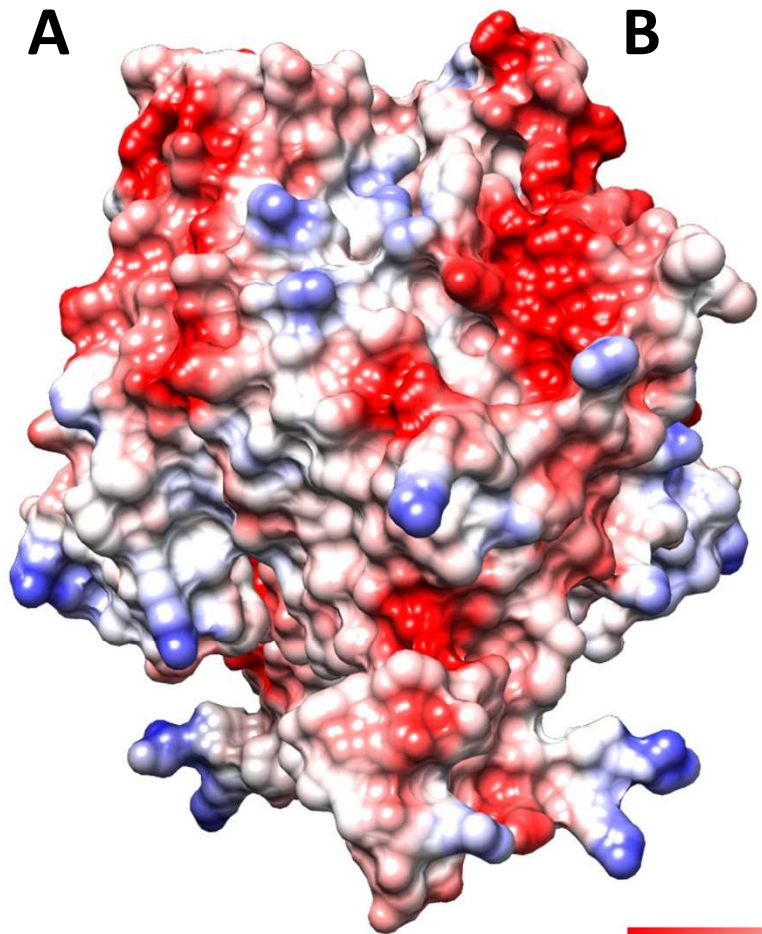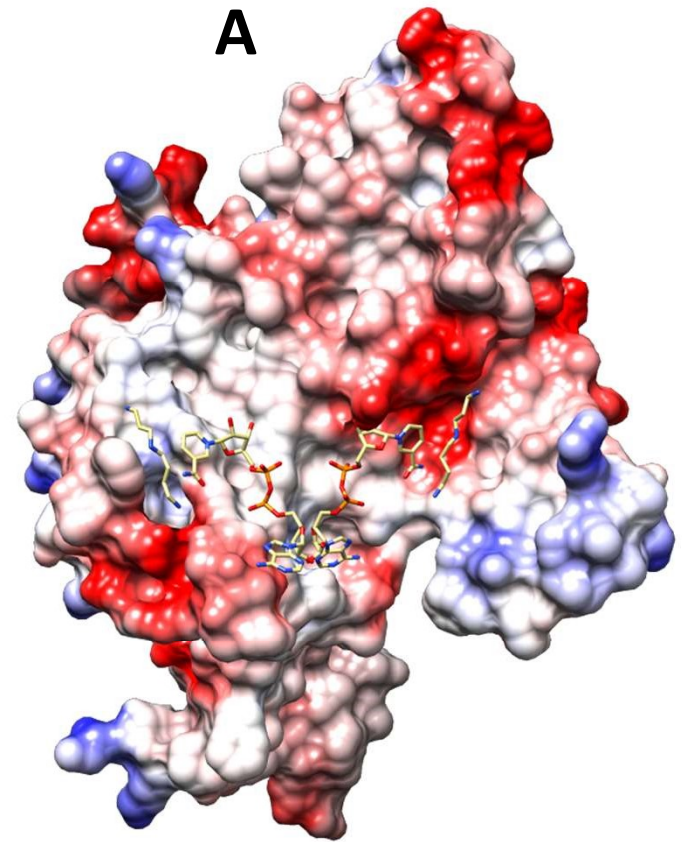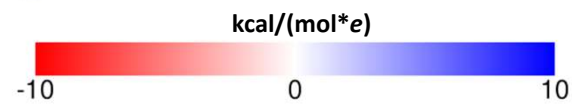

*Ipomoea alba* HSS

90°

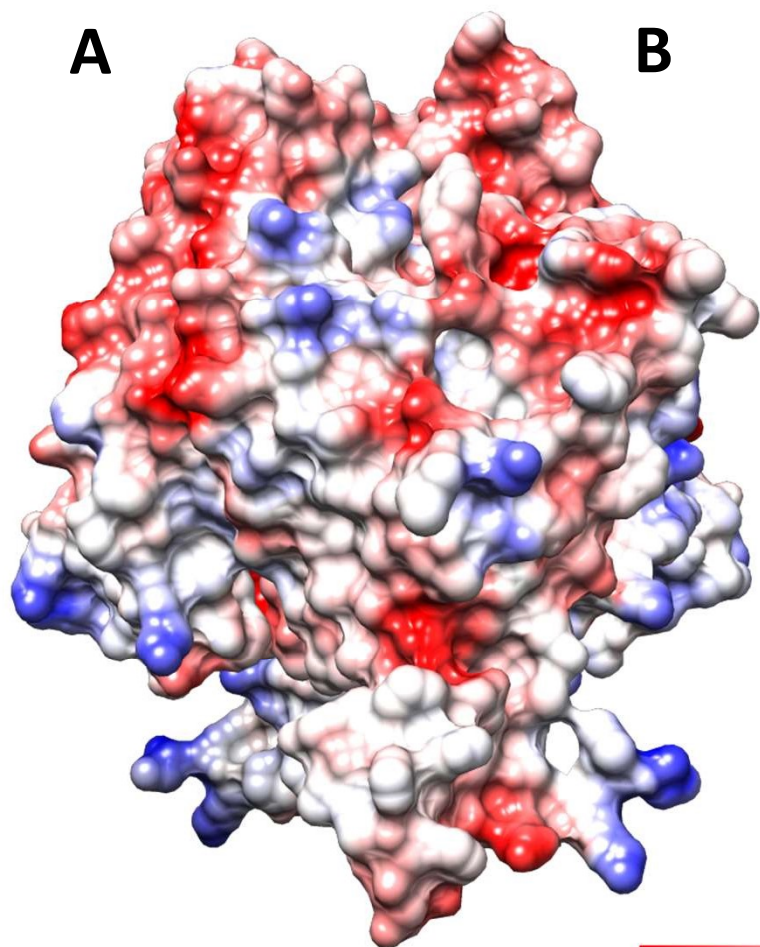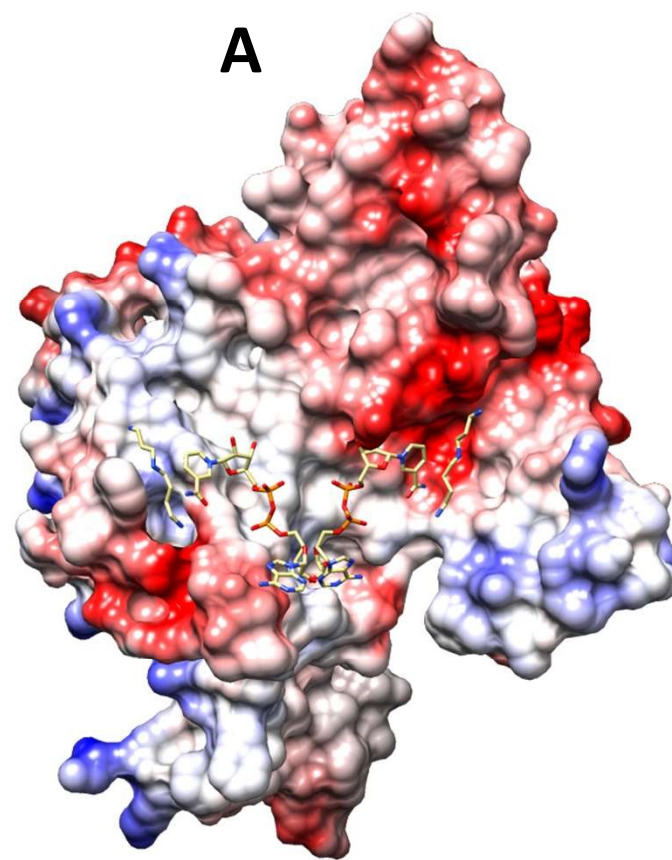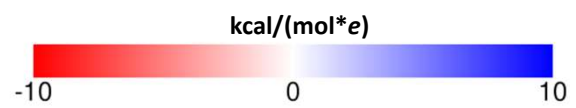

*Camonea umbellata* DHS

90°

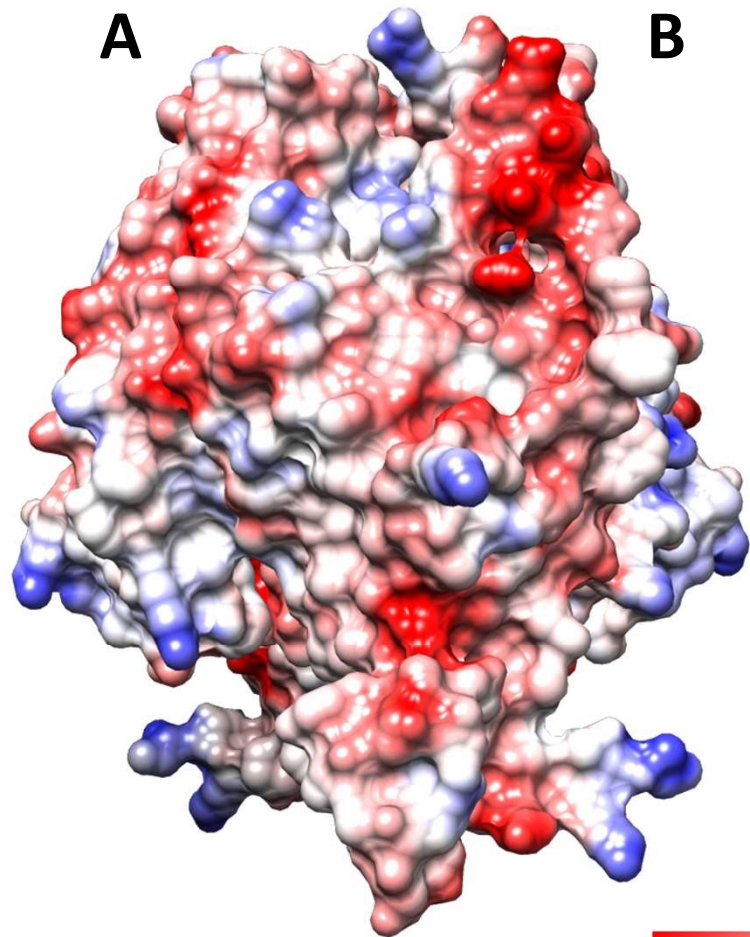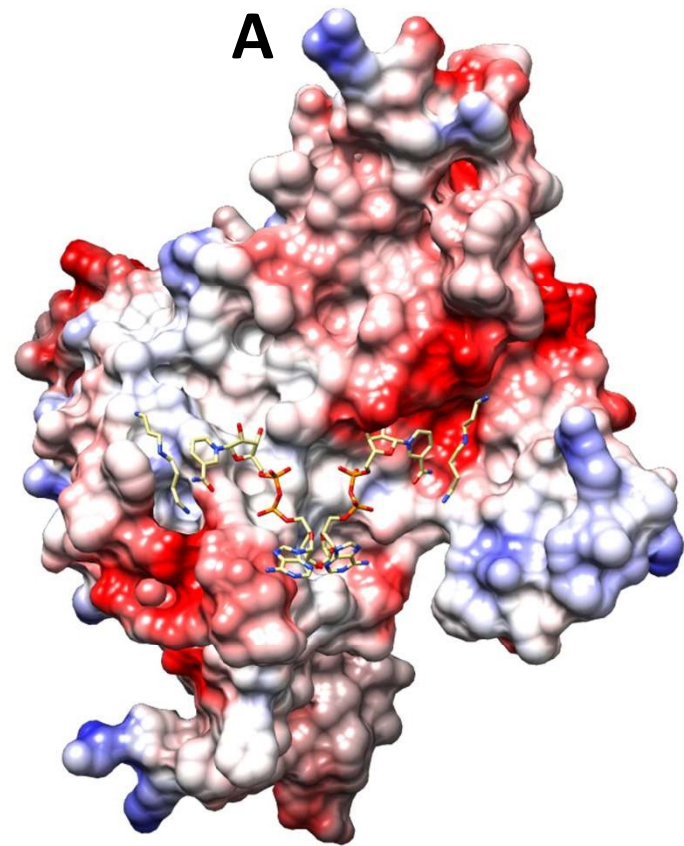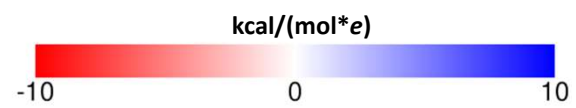



*Camonea umbellata* HSS

90°  
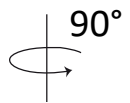

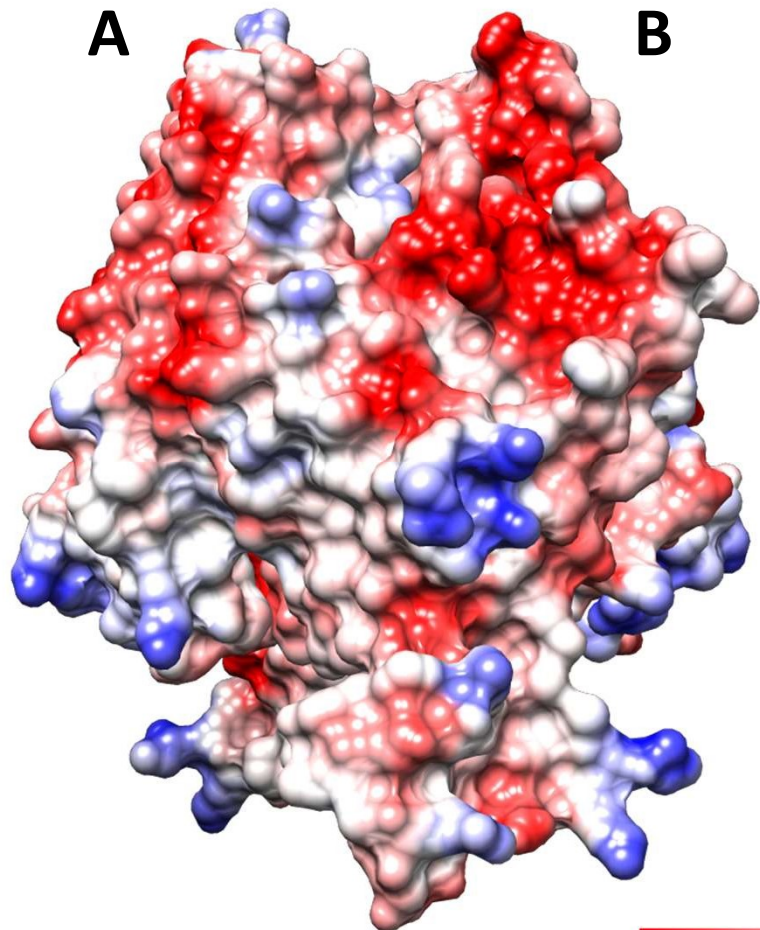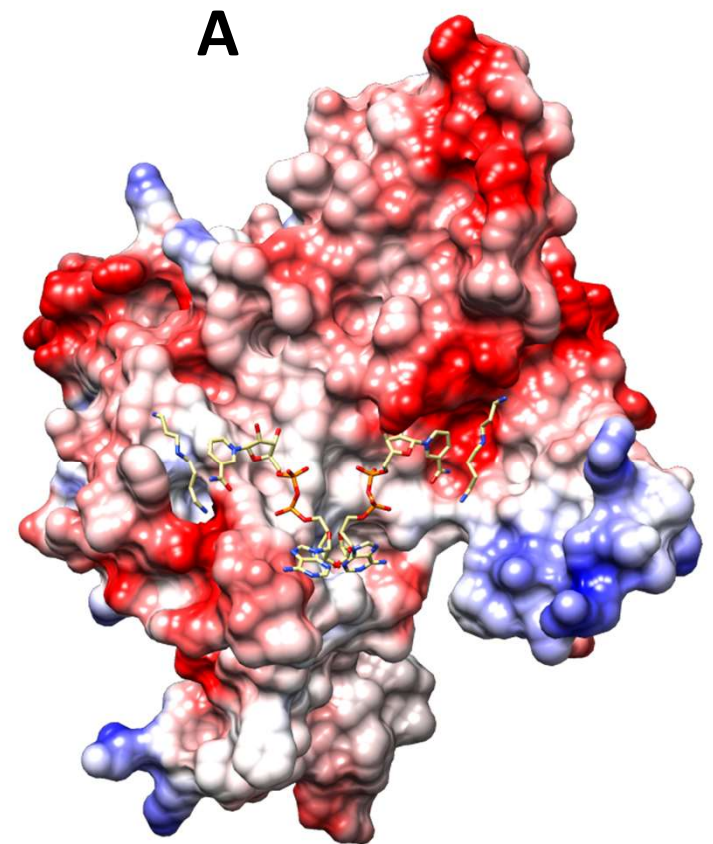

*Distimake quinquefolius* 1 DHS

90°  
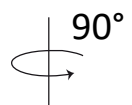

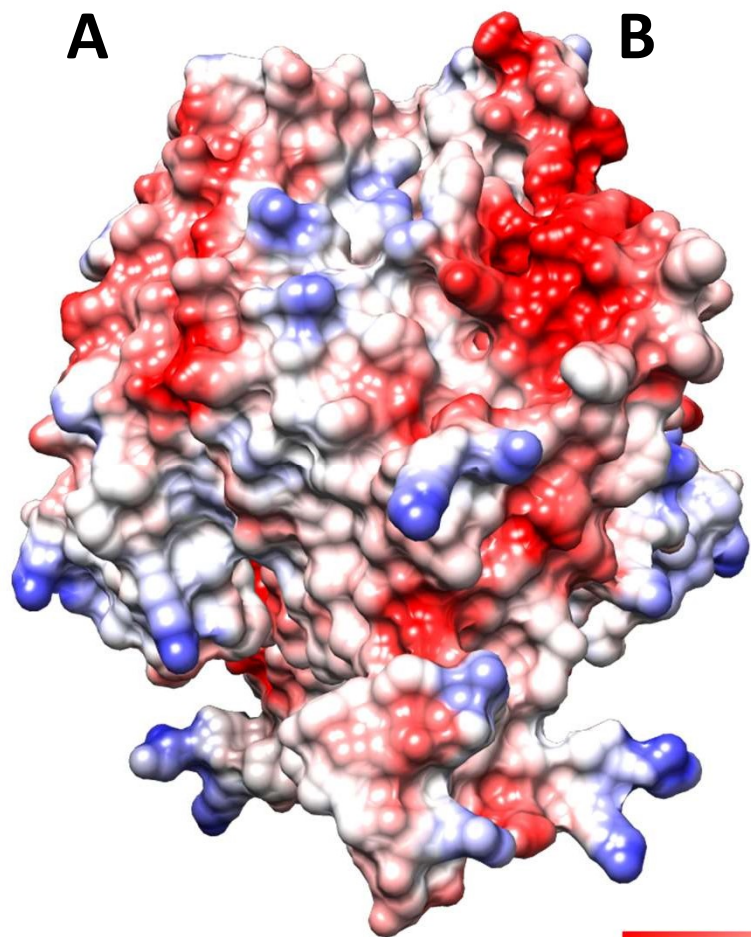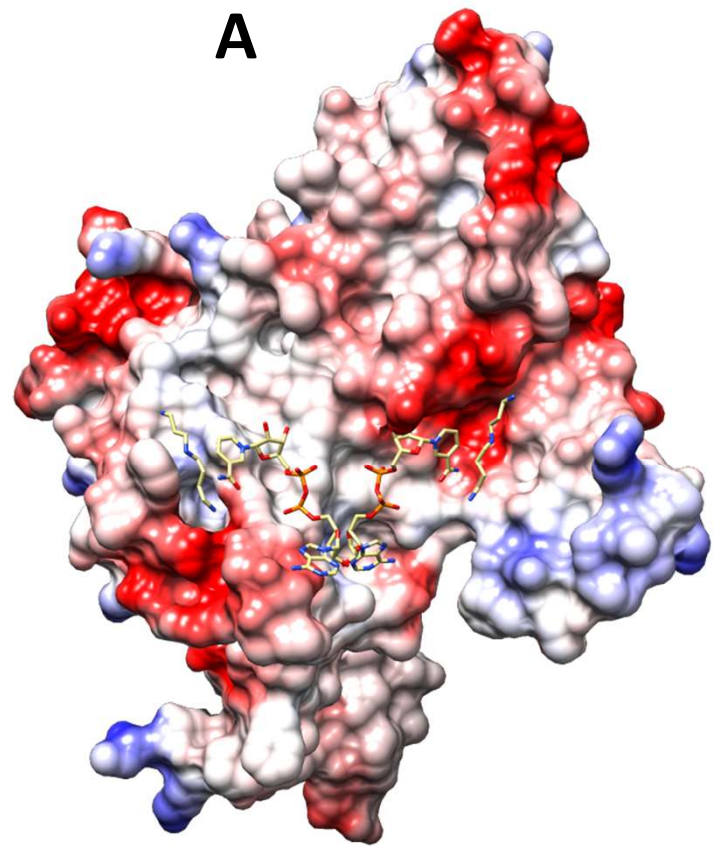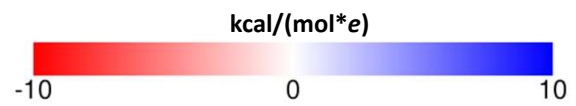

*Distimake quinquefolius* 1 HSS

90°

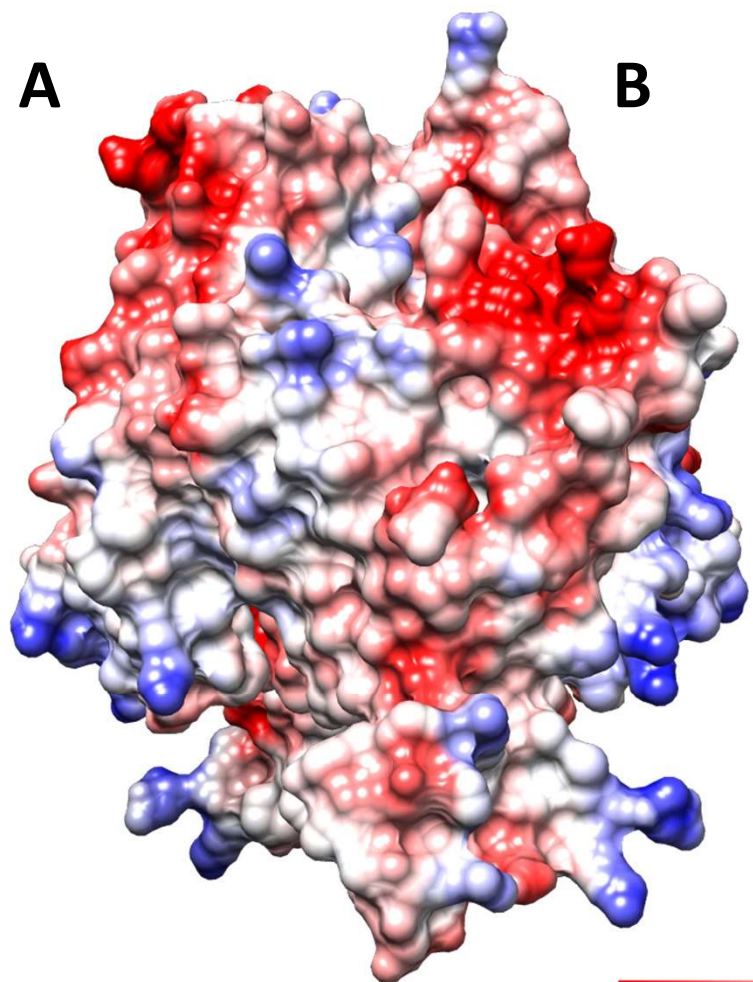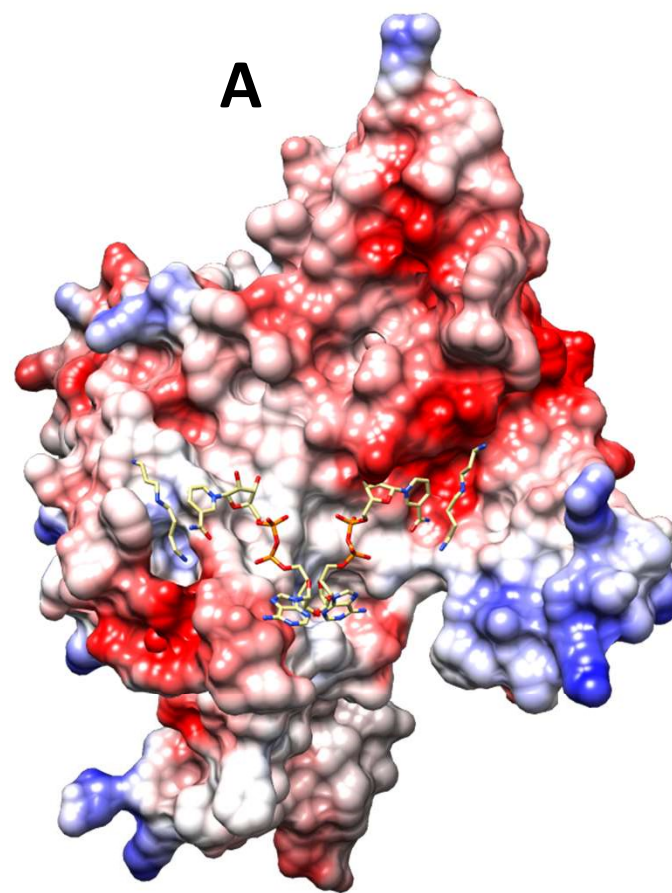

*Distimake quinquefolius* 2 DHS

90°

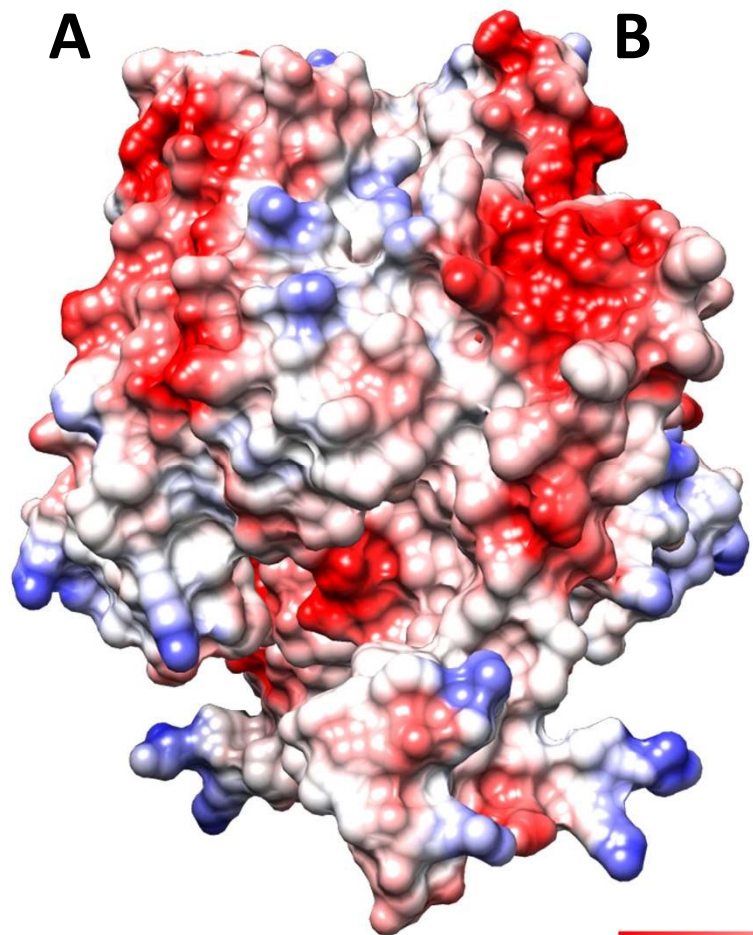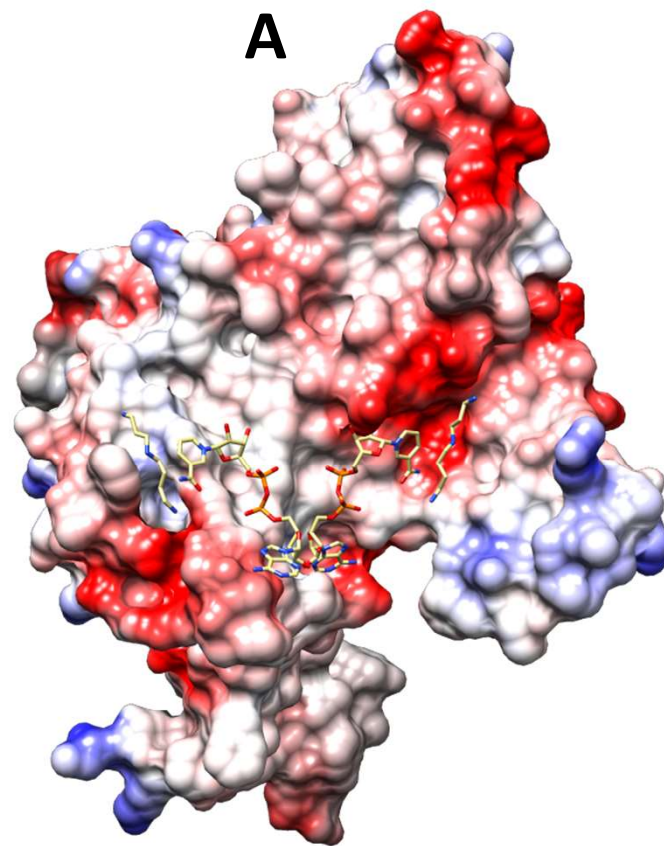

*Distimake quinquefolius* 2 HSS

90°

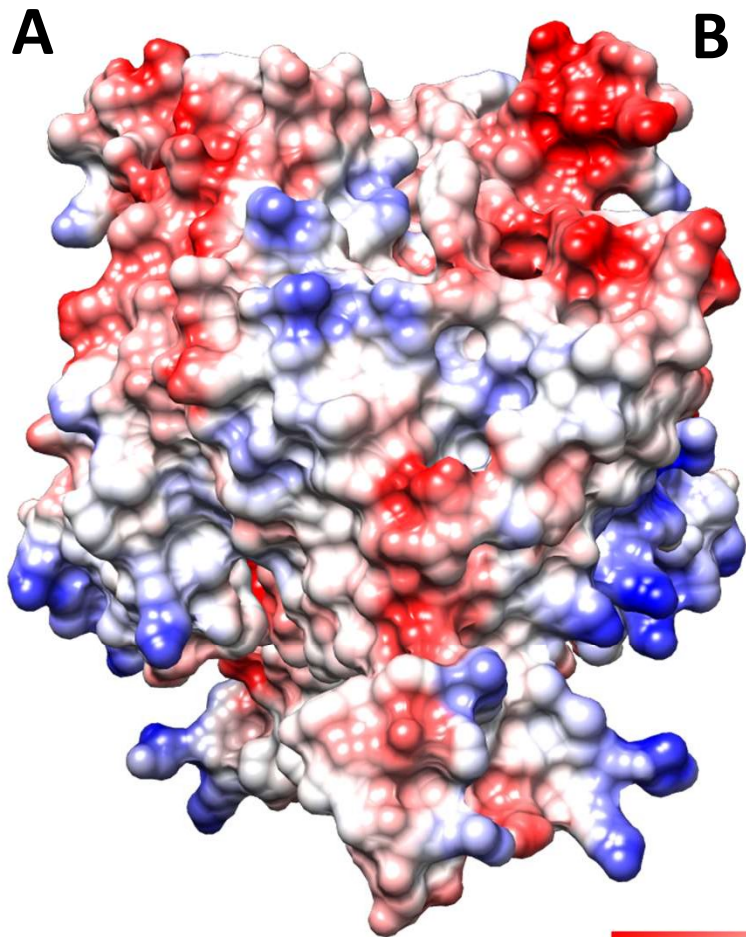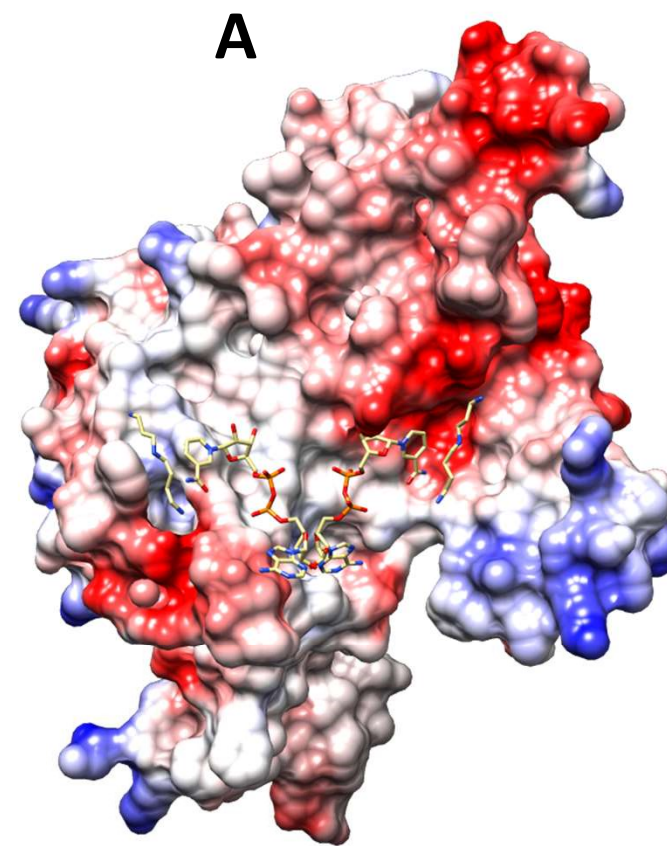

Supplement: PLD3-6-e420-s002.pdf [file PLD3-6-e420-s002.pdf]
