# Supplementary material for: The long road of functional recruitment—The evolution of a gene duplicate to pyrrolizidine alkaloid biosynthesis in the morning glories (Convolvulaceae)
Source: PubMed Central journal article supplement — Plant Direct. 2022 Jul 19;6(7):e420. doi: 10.1002/pld3.420 (PMC9295680; doi:10.1002/pld3.420), 2022-07-19
Supplement: PLD3-6-e420-s003.pdf [file PLD3-6-e420-s003.pdf]

## Supplemental figure 3. **Homology models.**

Shown are the surface representation of the A-B dimer and the A monomer from

- *Ipomoea neei* DHS & HSS
- *Ipomoea alba* DHS & HSS
- *Camonea umbellata* DHS & HSS
- *Distimake quinquefolius* individuuum 1 and 2, DHS & HSS

Residues that differ between the corresponding DHS and HSS pairs from one species are colored in yellow. If these residues are additionally located in the interface of the A-B dimer, they are colored in orange. The interface area of chain A is colored in light gray with the catalytic lysine in purple. The location of the extended HSS motif and the conserved RAM motif is indicated. The substrate entrance tunnel is highlighted in slide 3.

*Ipomoea neei* DHS

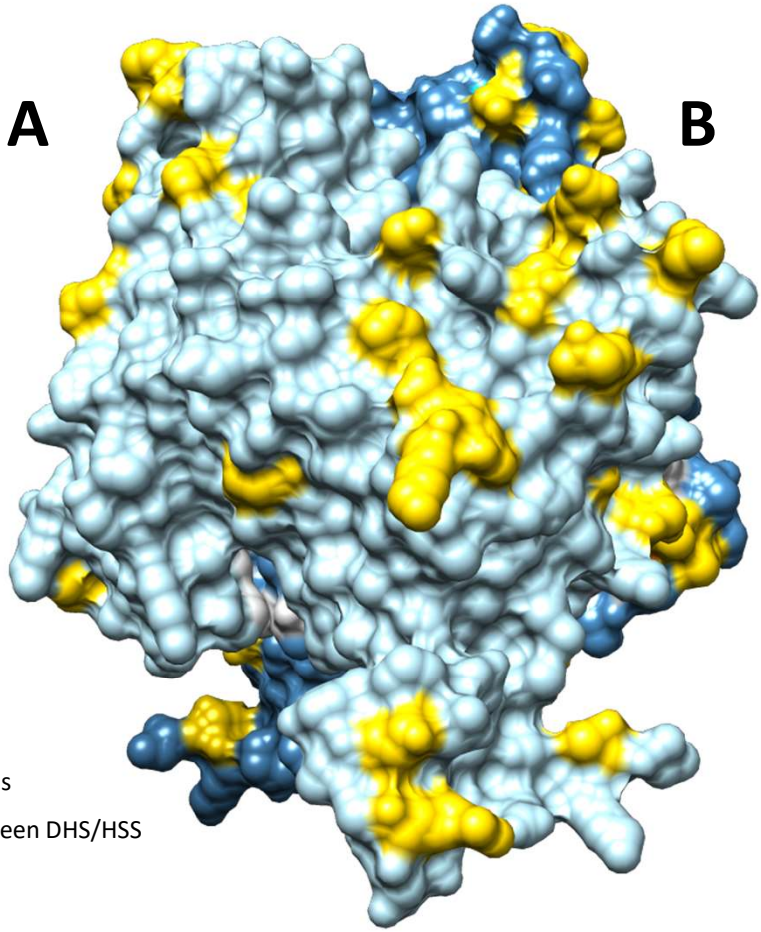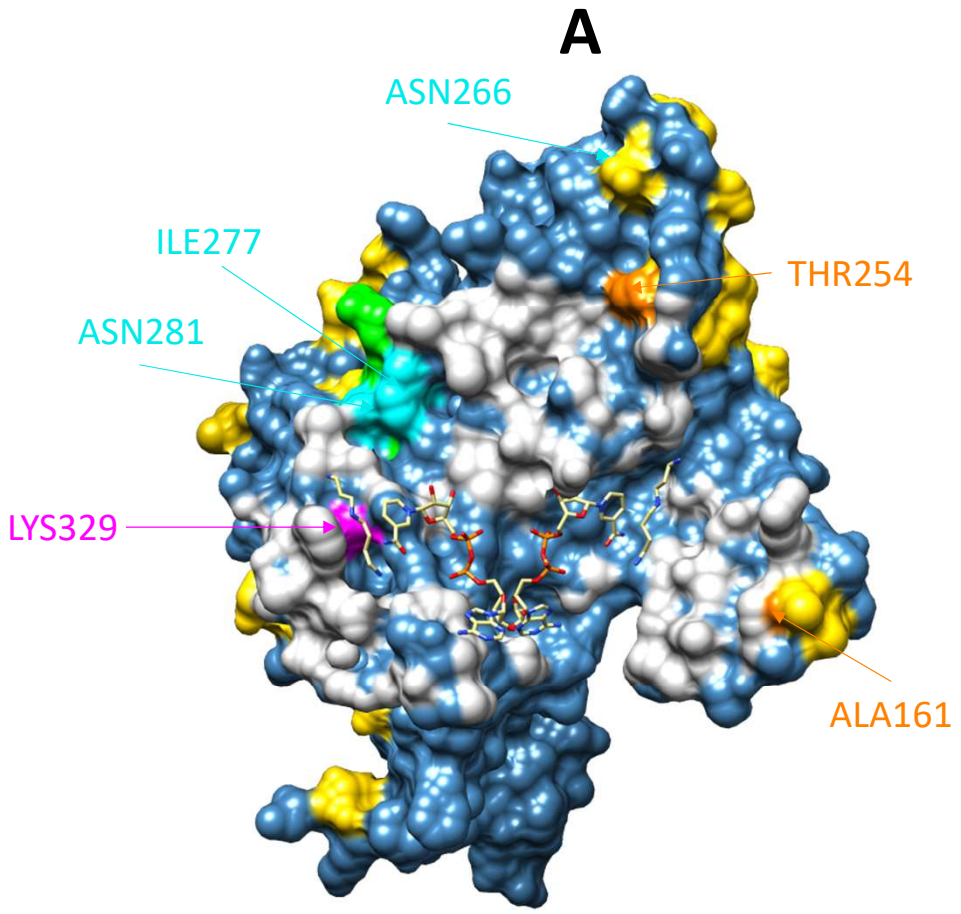

- interface residues
- differences between DHS/HSS
- RAM motif
- catalytic lysine
- differences between DHS/HSS interface residues
- residues of extended HSS motif (if identical in DHS and HSS)
- residues of extended HSS motif (if different in DHS and HSS)

*Ipomoea neei* DHS

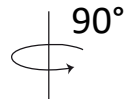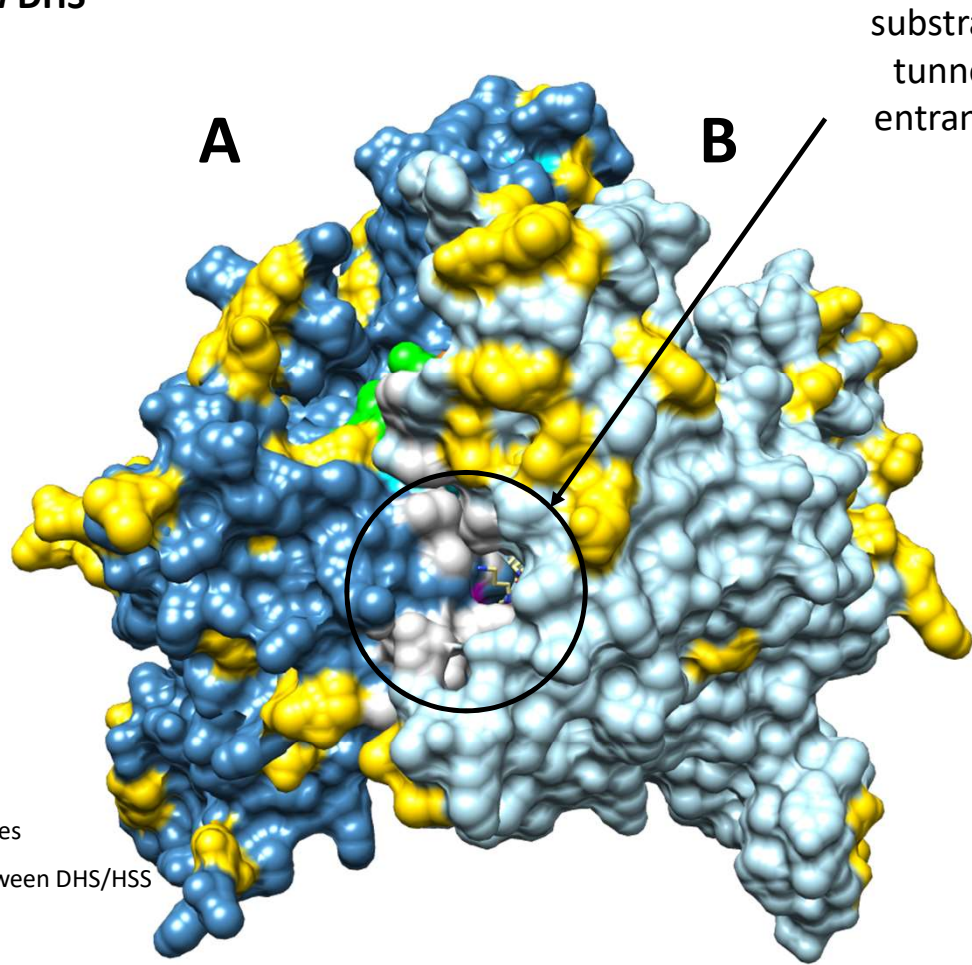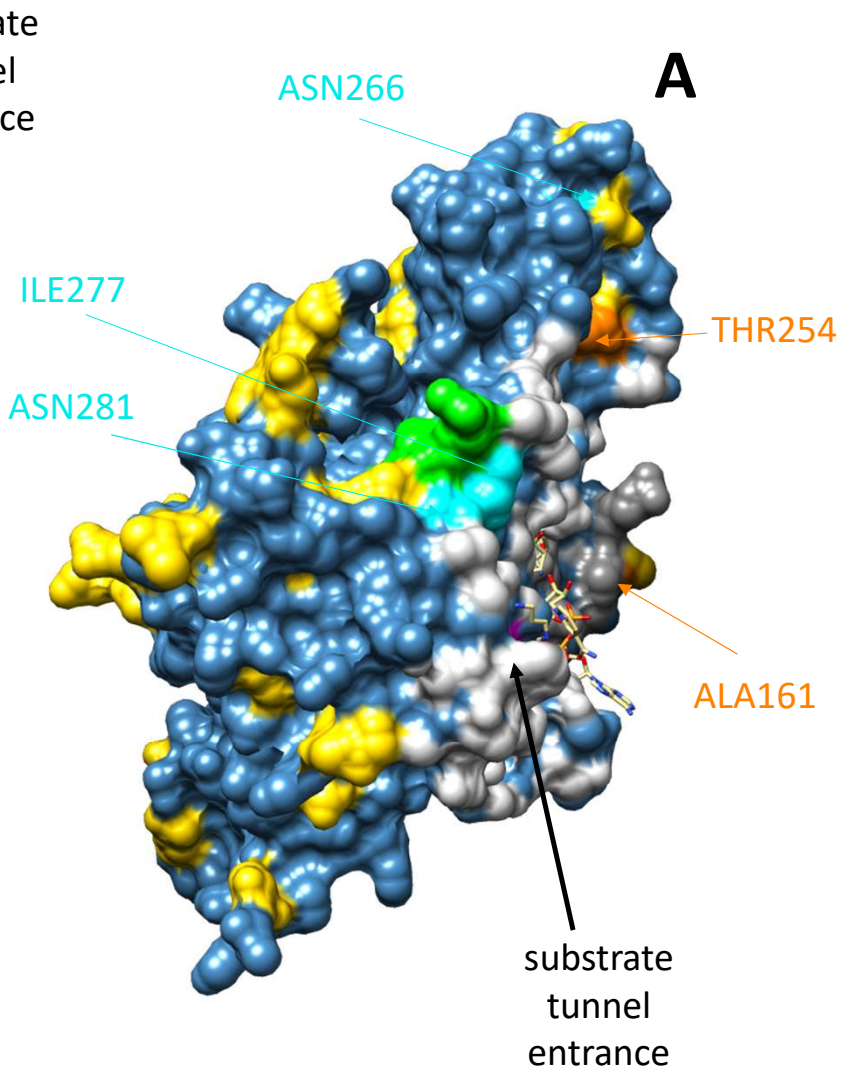

- interface residues
- differences between DHS/HSS
- RAM motif
- catalytic lysine
- differences between DHS/HSS interface residues
- residues of extended HSS motif (if identical in DHS and HSS)
- residues of extended HSS motif (if different in DHS and HSS)

*Ipomoea neei* HSS

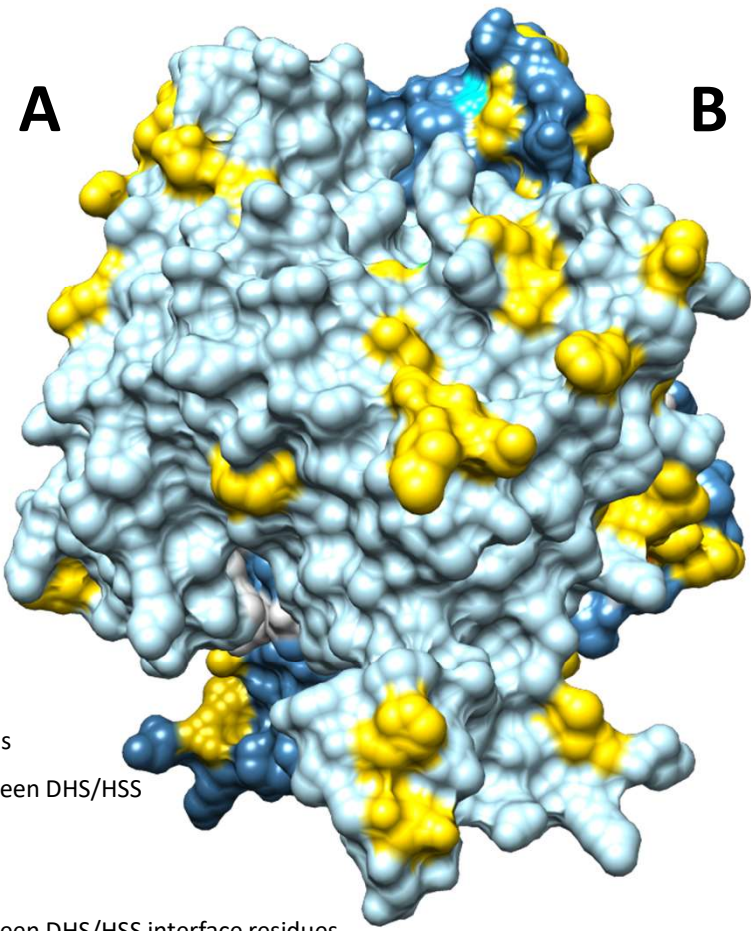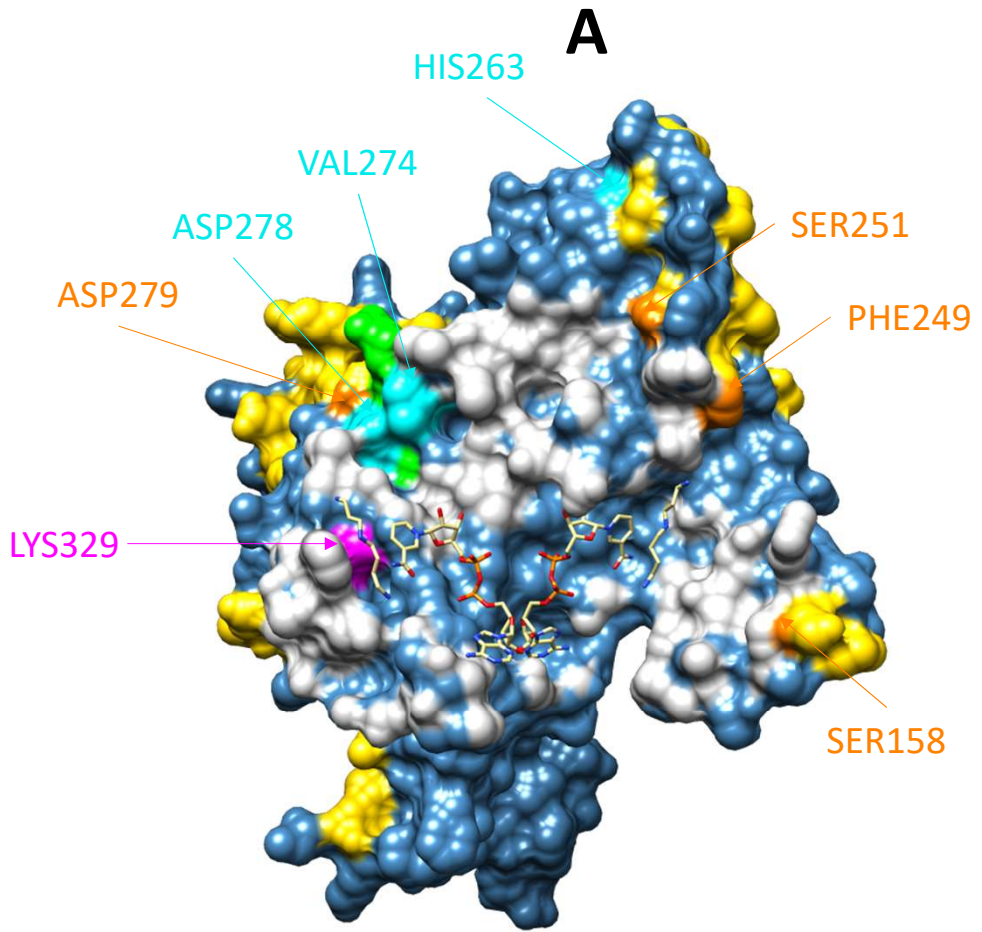

- interface residues
- differences between DHS/HSS
- RAM motif
- catalytic lysine
- differences between DHS/HSS interface residues
- residues of extended HSS motif (if identical in DHS and HSS)
- residues of extended HSS motif (if different in DHS and HSS)

*Ipomoea neei* HSS

| DHS                                        | HSS    |
|--------------------------------------------|--------|
| <b>interface residues &amp; different:</b> |        |
| <b>Ala161</b>                              | Ser158 |
| <i>no interface residue</i>                | Phe249 |
| <b>Thr254</b>                              | Ser251 |
| <i>no interface residue</i>                | Asp279 |
| <b>extended HSS motif:</b>                 |        |
| <b>Asn266</b>                              | His263 |
| <b>Ile277</b>                              | Val274 |
| <b>Asn281</b>                              | Asp278 |

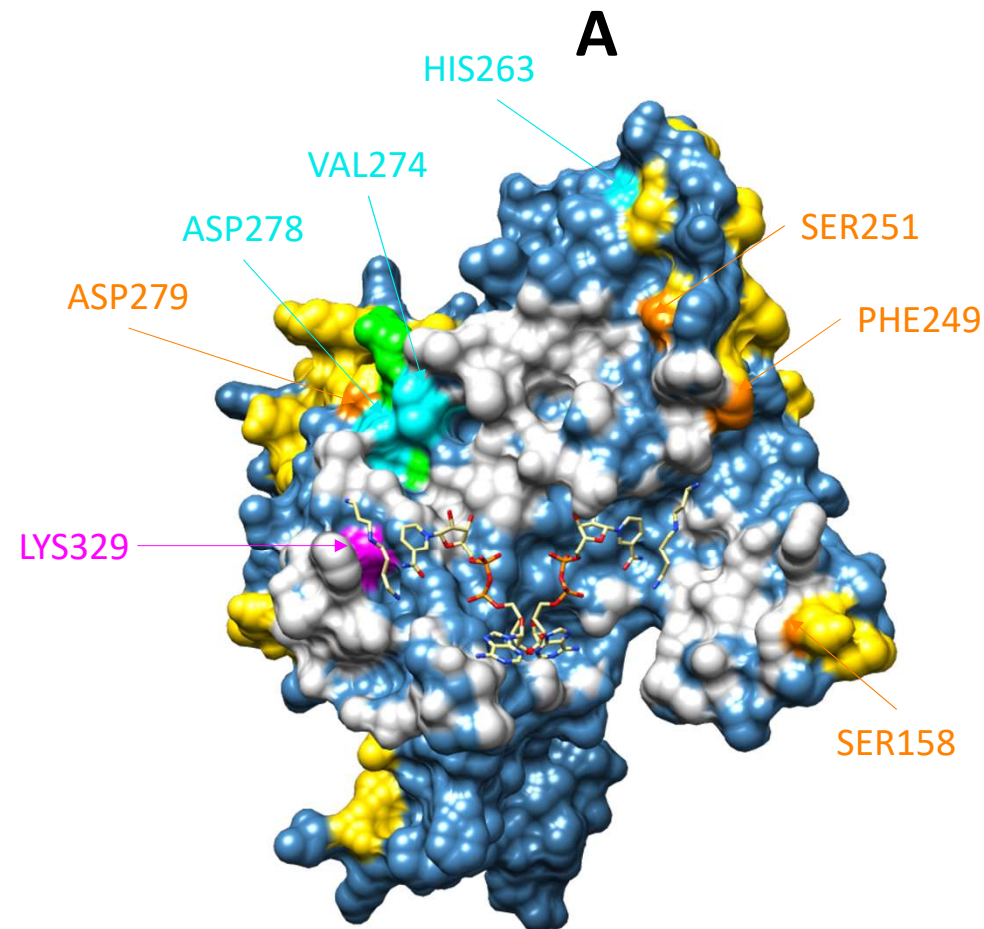

- interface residues
- differences between DHS/HSS
- RAM motif
- catalytic lysine
- differences between DHS/HSS interface residues
- residues of extended HSS motif (if identical in DHS and HSS)
- residues of extended HSS motif (if different in DHS and HSS)

*Ipomoea neei* HSS

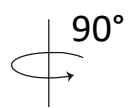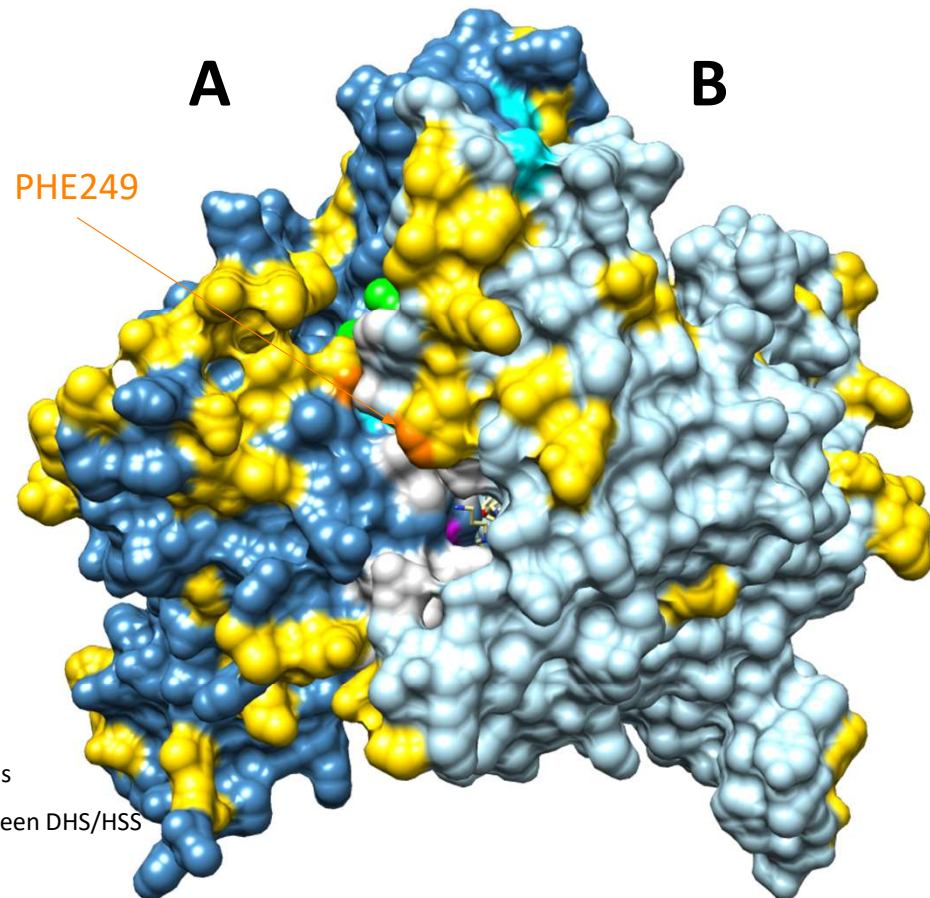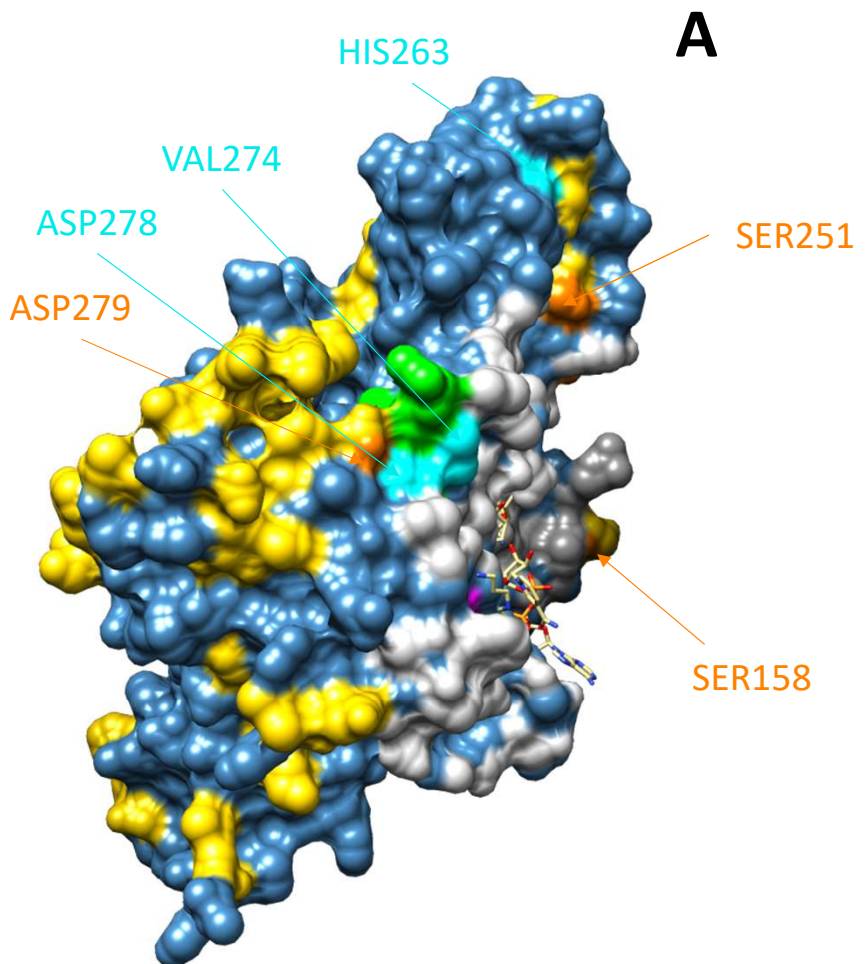

- interface residues
- differences between DHS/HSS
- RAM motif
- catalytic lysine
- differences between DHS/HSS interface residues
- residues of extended HSS motif (if identical in DHS and HSS)
- residues of extended HSS motif (if different in DHS and HSS)

*Ipomoea alba* DHS

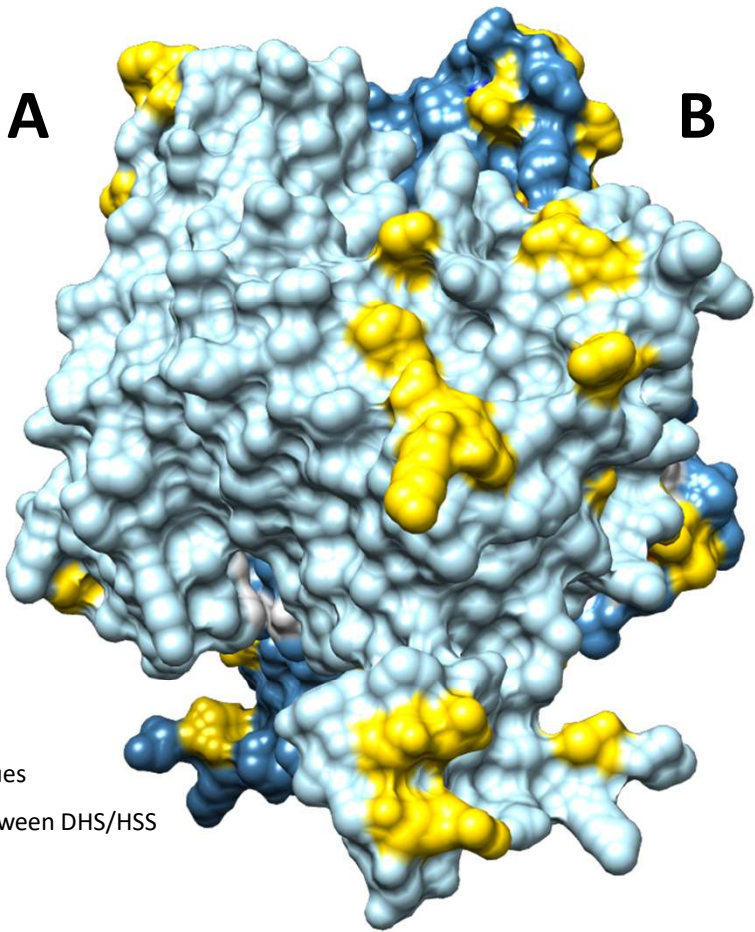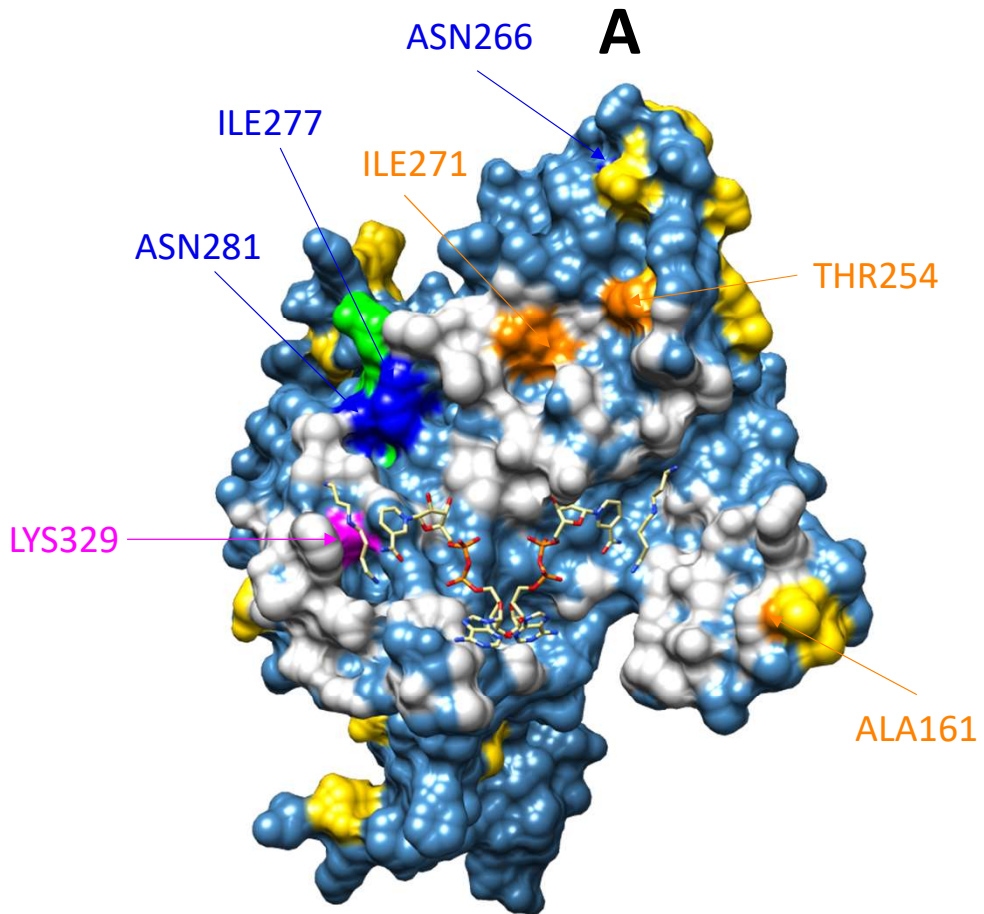

- interface residues
- differences between DHS/HSS
- RAM motif
- catalytic lysine
- differences between DHS/HSS interface residues
- residues of extended HSS motif (if identical in DHS and HSS)
- residues of extended HSS motif (if different in DHS and HSS)

*Ipomoea alba* DHS

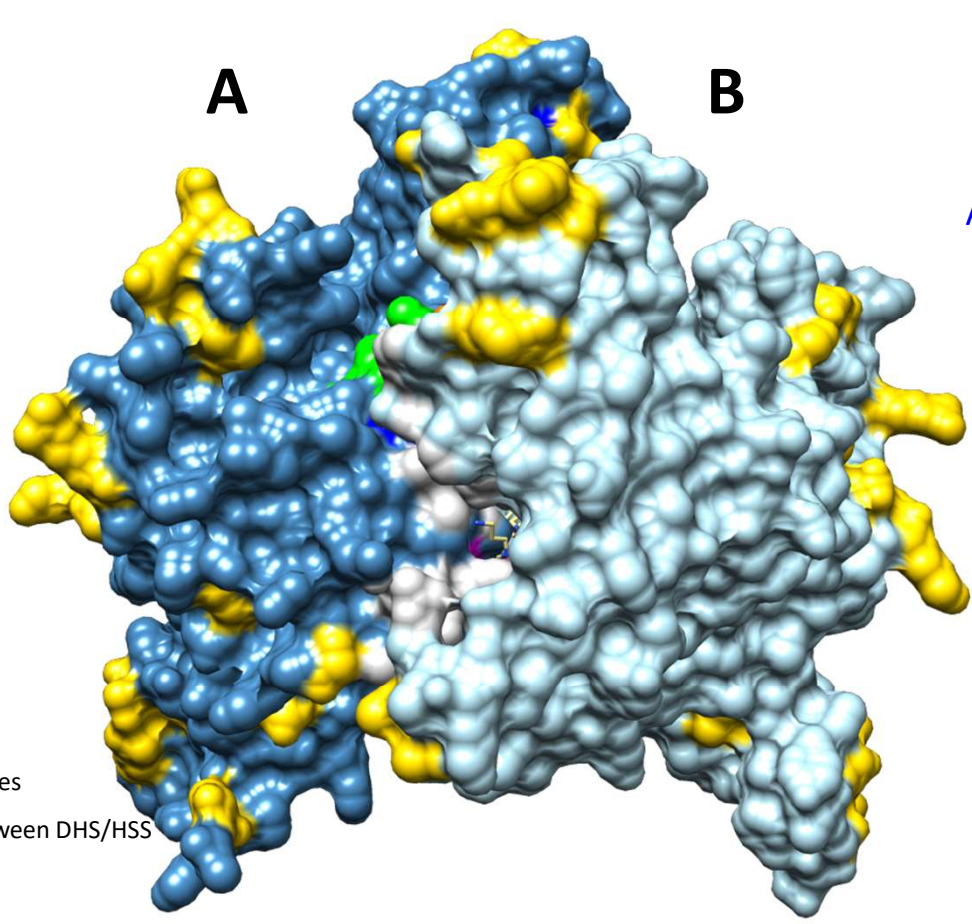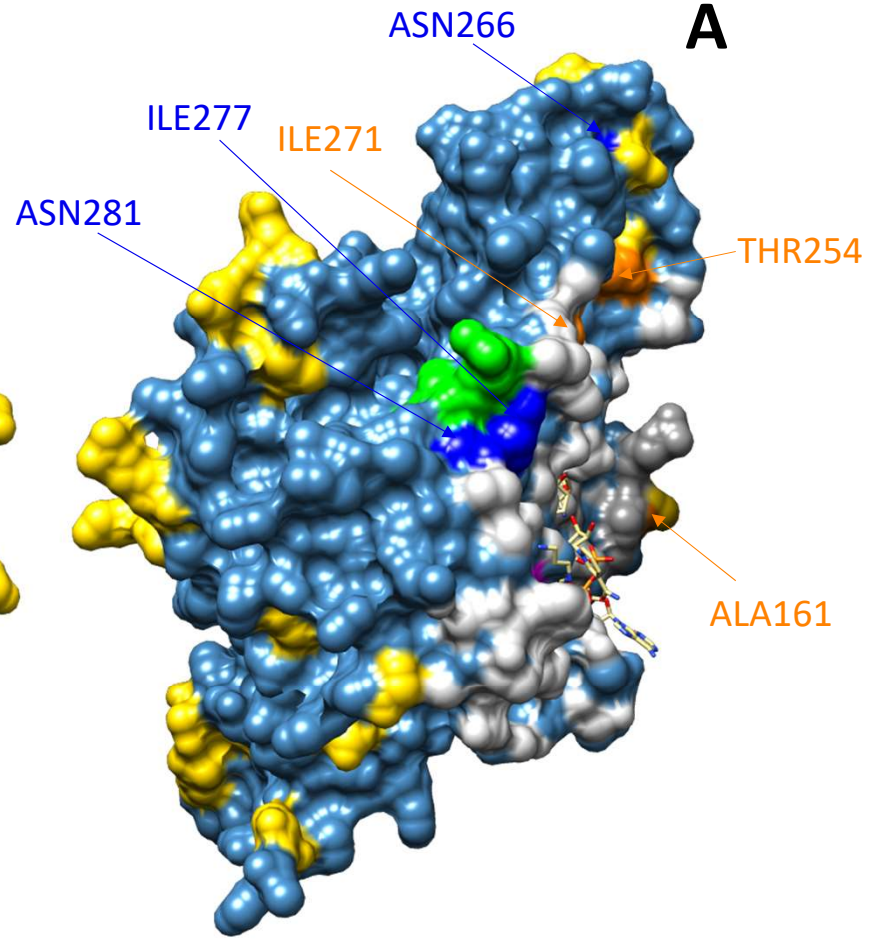

- interface residues
- differences between DHS/HSS
- RAM motif
- catalytic lysine
- differences between DHS/HSS interface residues
- residues of extended HSS motif (if identical in DHS and HSS)
- residues of extended HSS motif (if different in DHS and HSS)



*Ipomoea alba* HSS

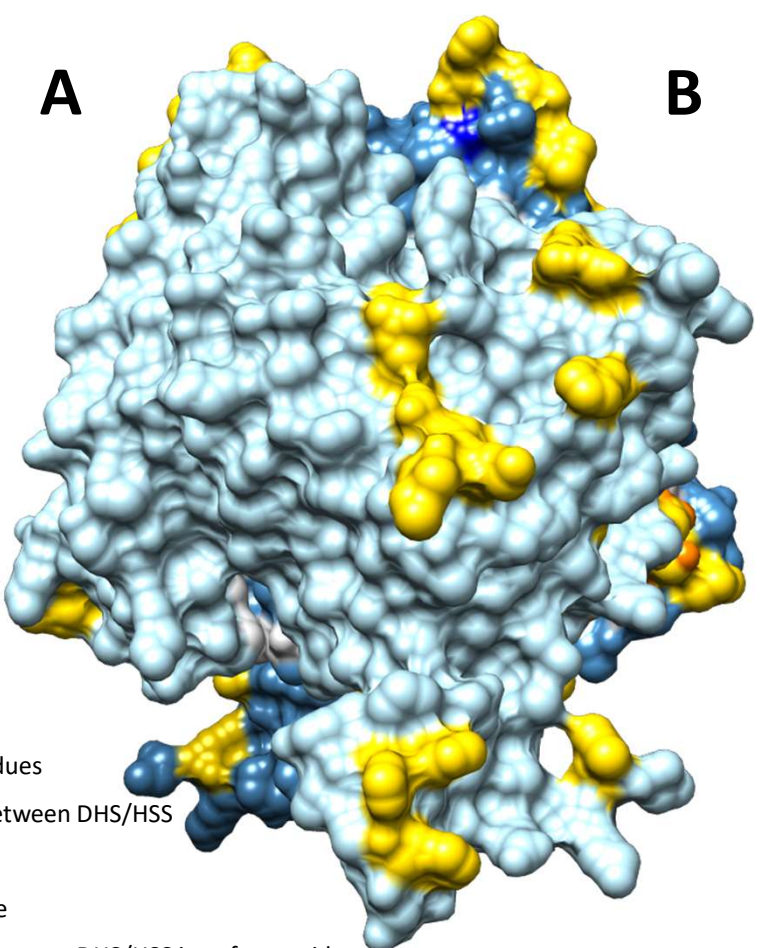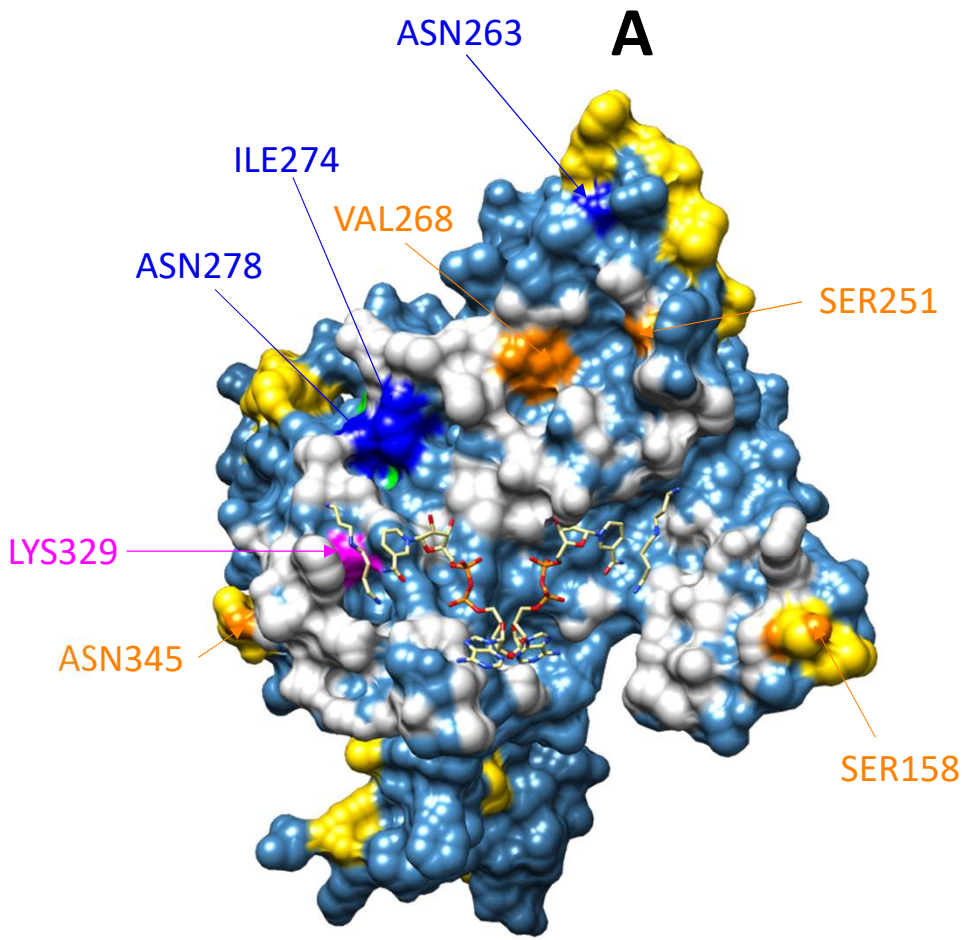

- interface residues
- differences between DHS/HSS
- RAM motif
- catalytic lysine
- differences between DHS/HSS interface residues
- residues of extended HSS motif (if identical in DHS and HSS)
- residues of extended HSS motif (if different in DHS and HSS)

*Ipomoea alba* HSS

| DHS                                        | HSS    |
|--------------------------------------------|--------|
| <b>interface residues &amp; different:</b> |        |
| <b>Ala161</b>                              | Ser158 |
| <b>Thr254</b>                              | Ser251 |
| <b>Ile271</b>                              | Val268 |
| <i>no interface residue</i>                | Asn345 |
| <b>extended HSS motif:</b>                 |        |
| <b>Asn266</b>                              | Asn263 |
| <b>Ile277</b>                              | Ile274 |
| <b>Asn281</b>                              | Asn278 |

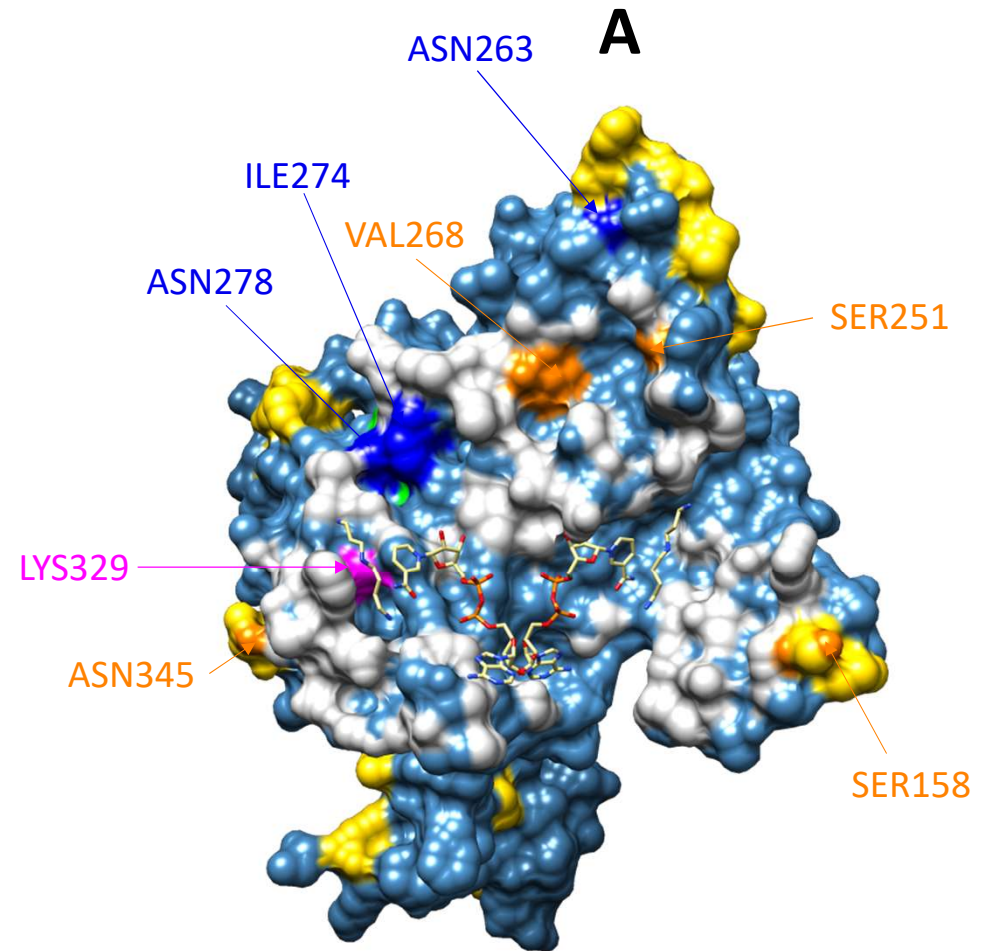

- interface residues
- differences between DHS/HSS
- RAM motif
- catalytic lysine
- differences between DHS/HSS interface residues
- residues of extended HSS motif (if identical in DHS and HSS)
- residues of extended HSS motif (if different in DHS and HSS)

*Ipomoea alba* HSS

90°

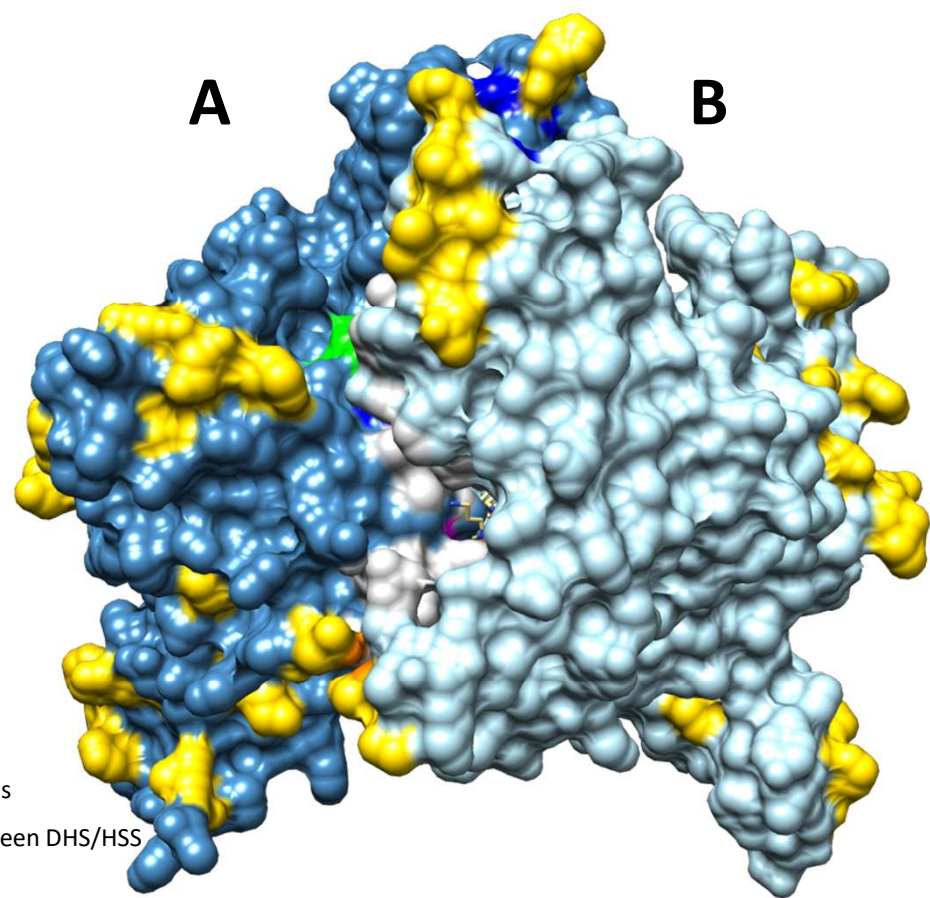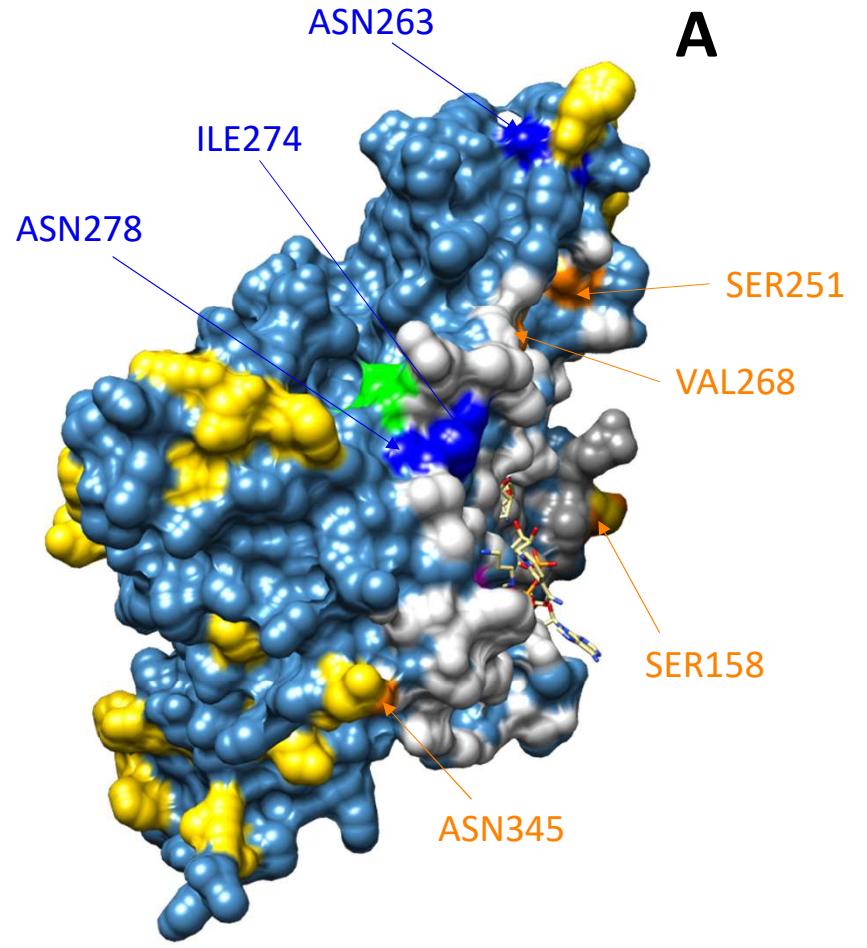

- grey interface residues
- yellow differences between DHS/HSS
- green RAM motif
- magenta catalytic lysine
- orange differences between DHS/HSS interface residues
- blue residues of extended HSS motif (if identical in DHS and HSS)
- cyan residues of extended HSS motif (if different in DHS and HSS)

*Camonea umbellata* DHS

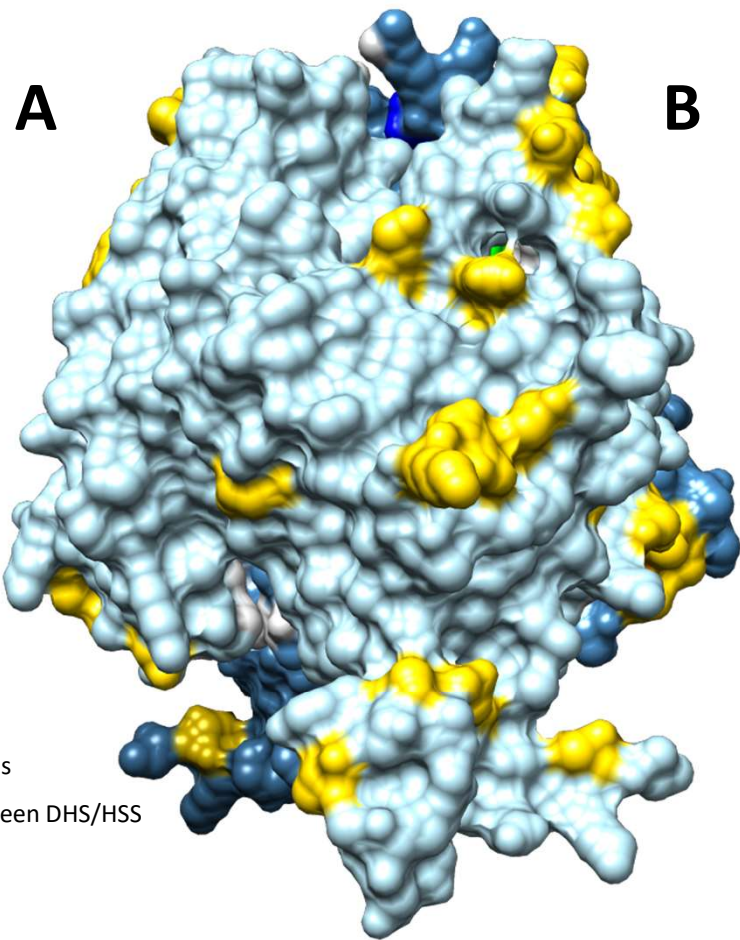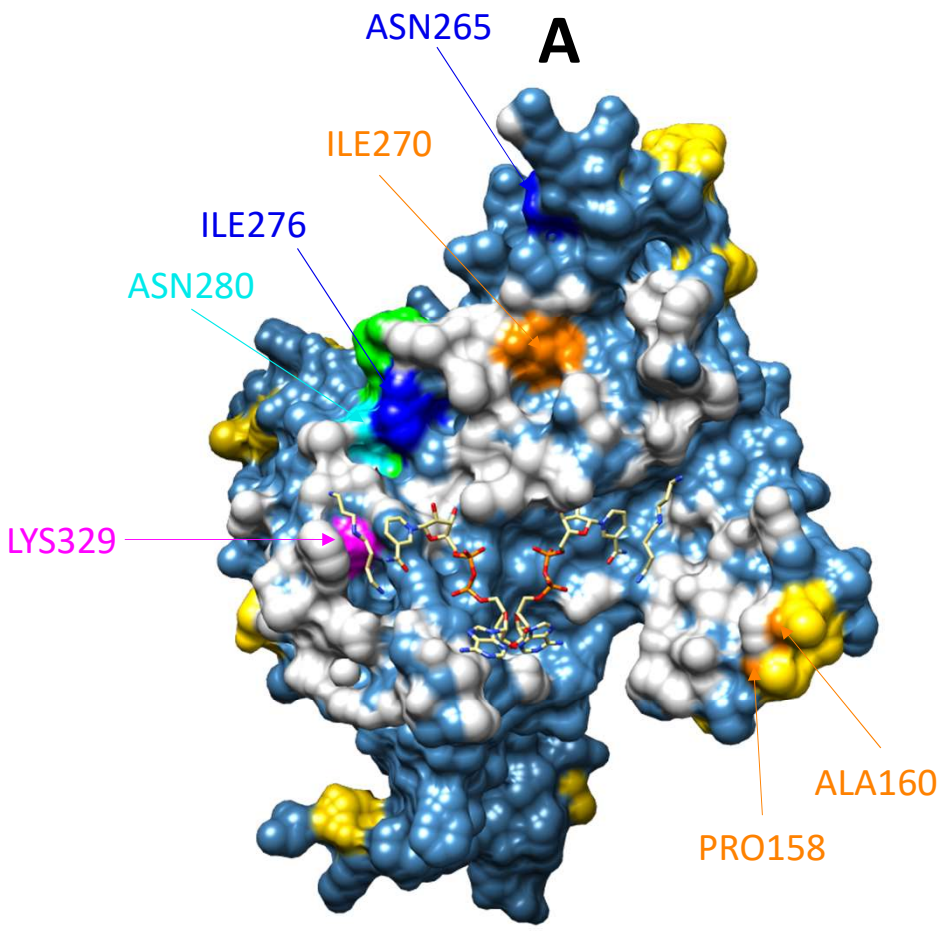

- interface residues
- differences between DHS/HSS
- RAM motif
- catalytic lysine
- differences between DHS/HSS interface residues
- residues of extended HSS motif (if identical in DHS and HSS)
- residues of extended HSS motif (if different in DHS and HSS)

*Camonea umbellata* DHS

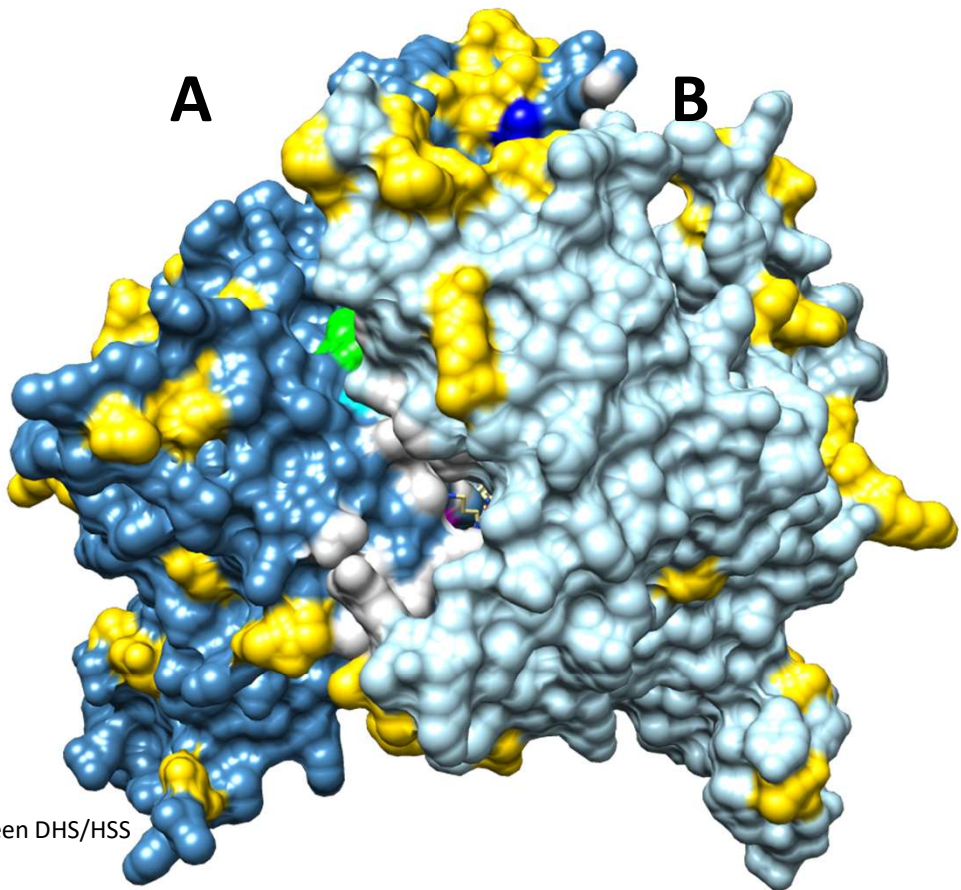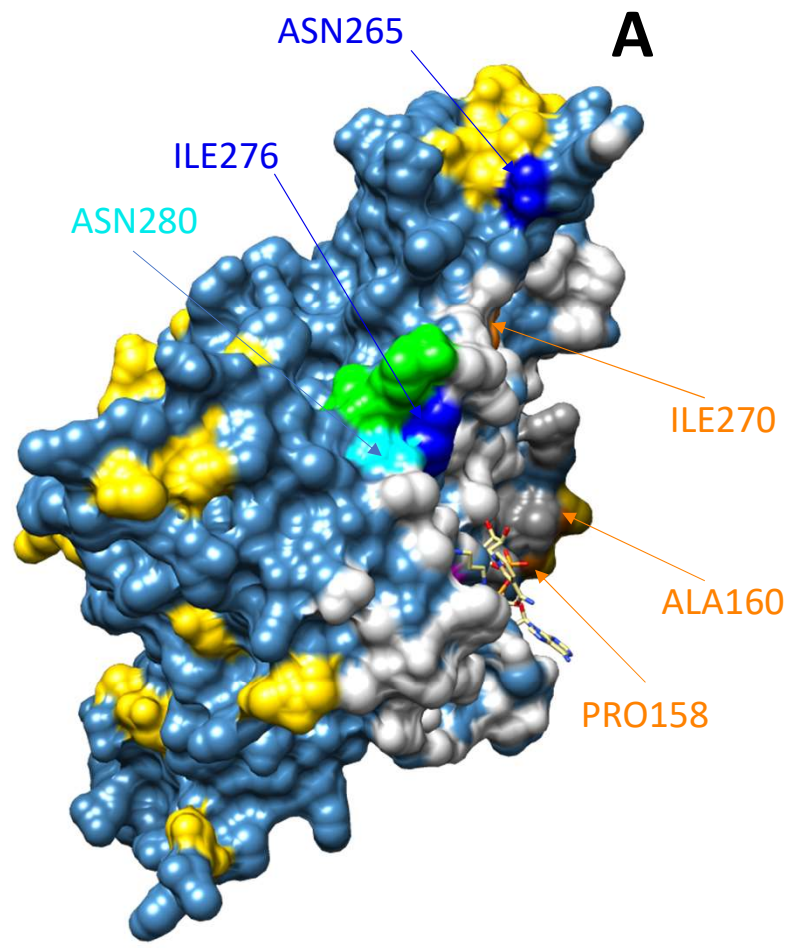

- interface residues
- differences between DHS/HSS
- RAM motif
- catalytic lysine
- differences between DHS/HSS interface residues
- residues of extended HSS motif (if identical in DHS and HSS)
- residues of extended HSS motif (if different in DHS and HSS)

*Camonea umbellata* HSS

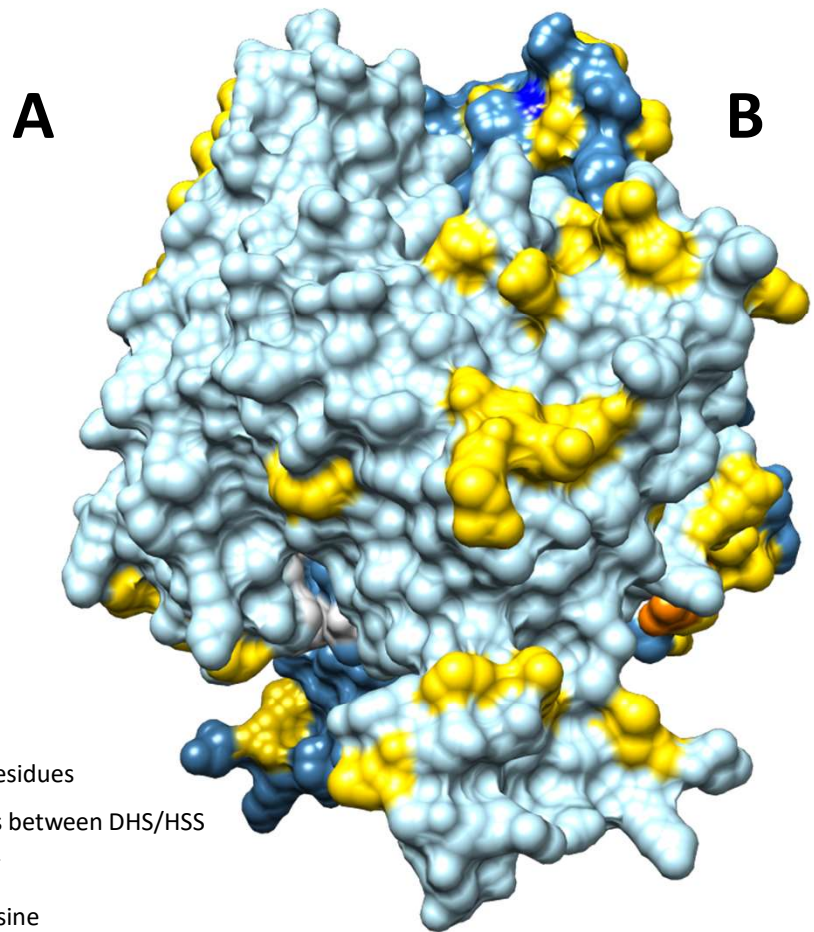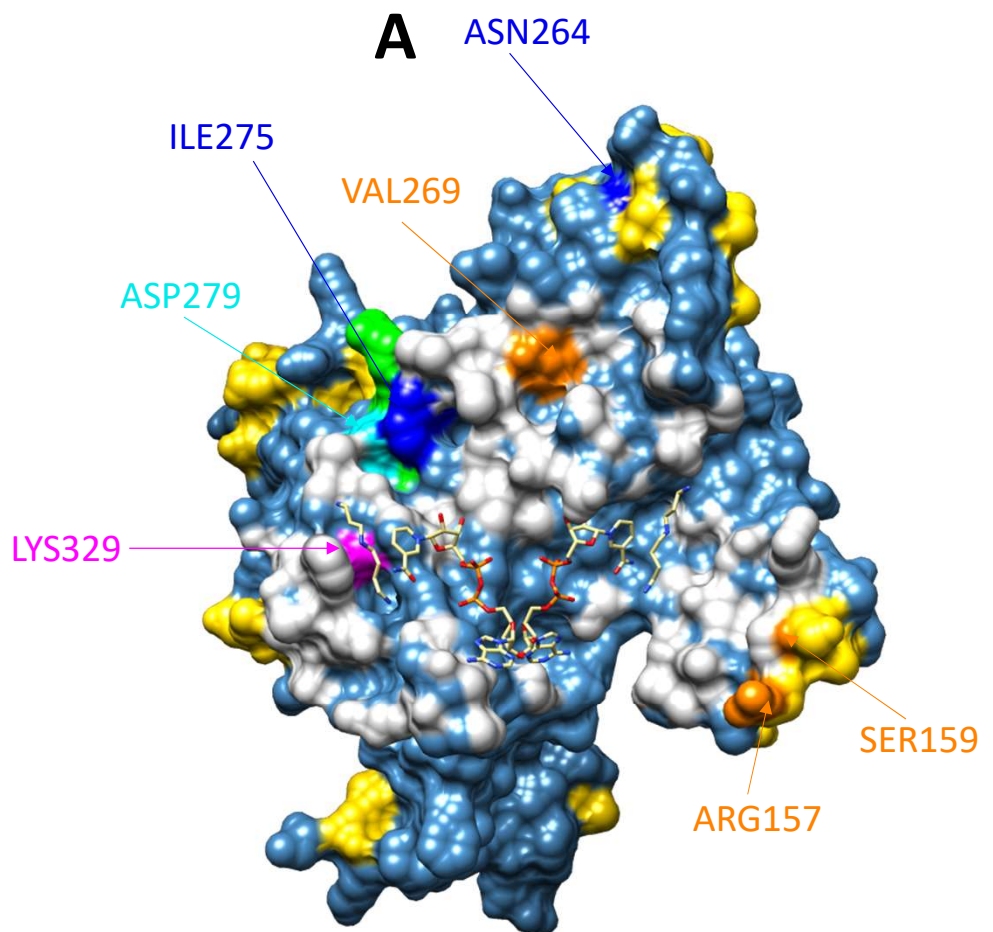

- interface residues
- differences between DHS/HSS
- RAM motif
- catalytic lysine
- differences between DHS/HSS interface residues
- residues of extended HSS motif (if identical in DHS and HSS)
- residues of extended HSS motif (if different in DHS and HSS)

*Camonea umbellata* HSS

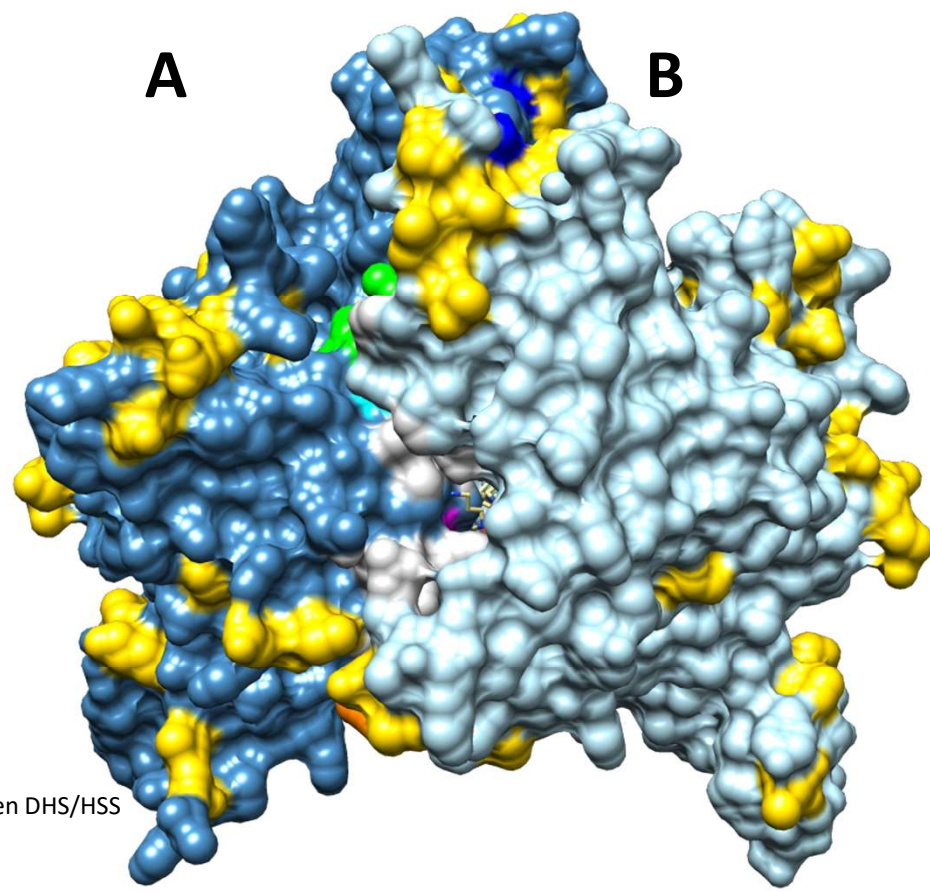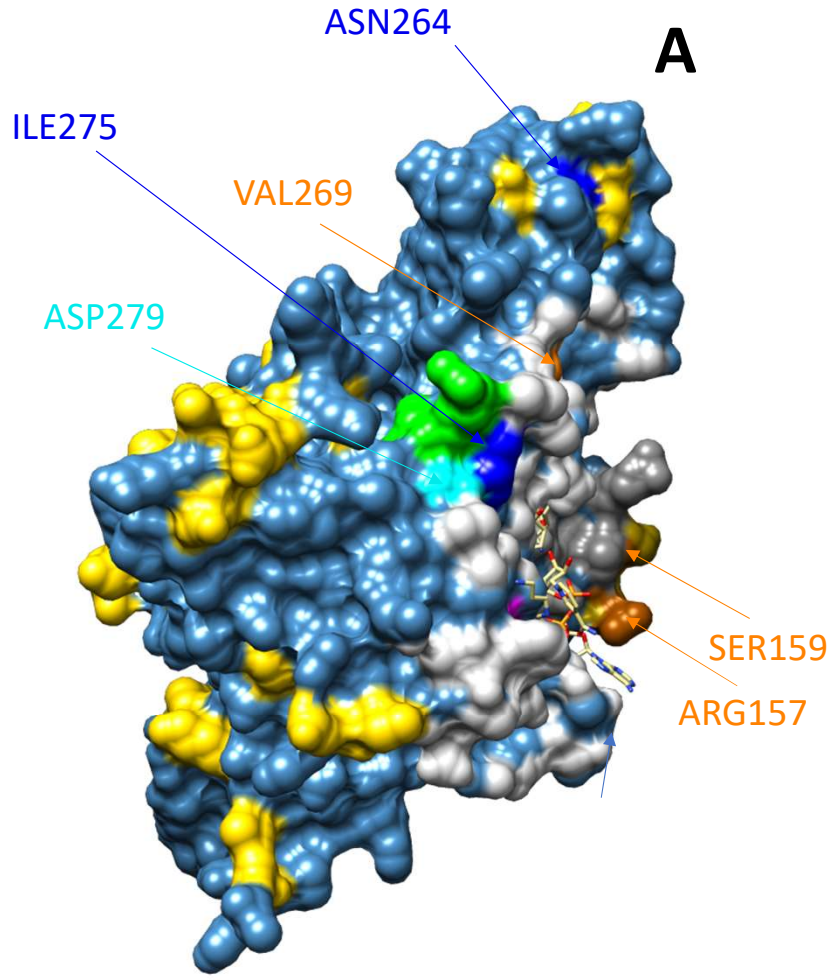

- interface residues
- differences between DHS/HSS
- RAM motif
- catalytic lysine
- differences between DHS/HSS interface residues
- residues of extended HSS motif (if identical in DHS and HSS)
- residues of extended HSS motif (if different in DHS and HSS)

**Camonea umbellata HSS**

| DHS                                        | HSS    |
|--------------------------------------------|--------|
| <b>interface residues &amp; different:</b> |        |
| <b>Pro158</b>                              | Arg157 |
| <b>Ala160</b>                              | Ser159 |
| <b>Ile270</b>                              | Val269 |

| <b>extended HSS motif:</b> |        |
|----------------------------|--------|
| <b>Asn265</b>              | Asn264 |
| <b>Ile276</b>              | Ile275 |
| <b>Asn280</b>              | Asp279 |

- interface residues
- differences between DHS/HSS
- RAM motif
- catalytic lysine
- differences between DHS/HSS interface residues
- residues of extended HSS motif (if identical in DHS and HSS)
- residues of extended HSS motif (if different in DHS and HSS)

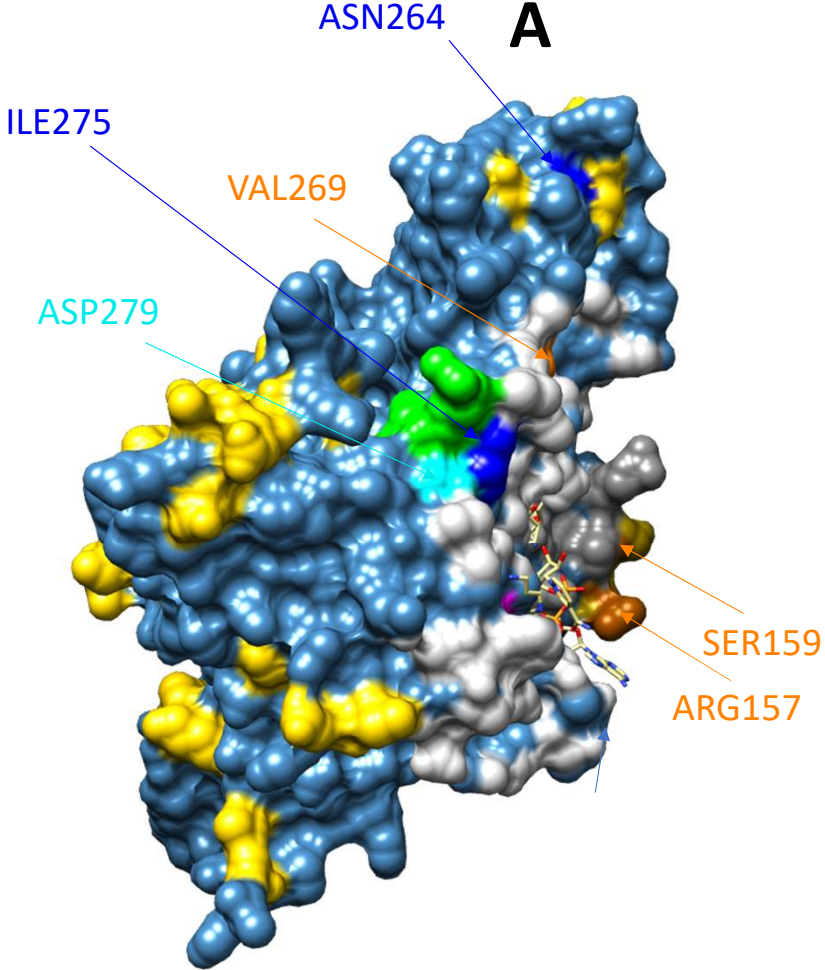



*Distimake quinquefolius* 1 DHS

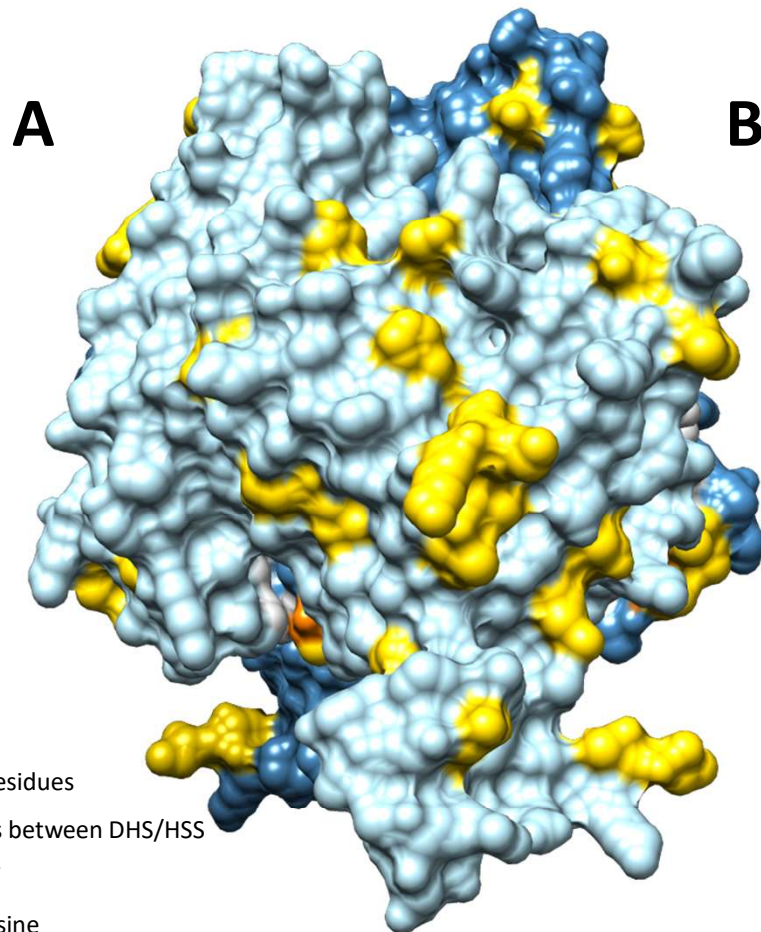

- interface residues
- differences between DHS/HSS
- RAM motif
- catalytic lysine
- differences between DHS/HSS interface residues
- residues of extended HSS motif (if identical in DHS and HSS)
- residues of extended HSS motif (if different in DHS and HSS)

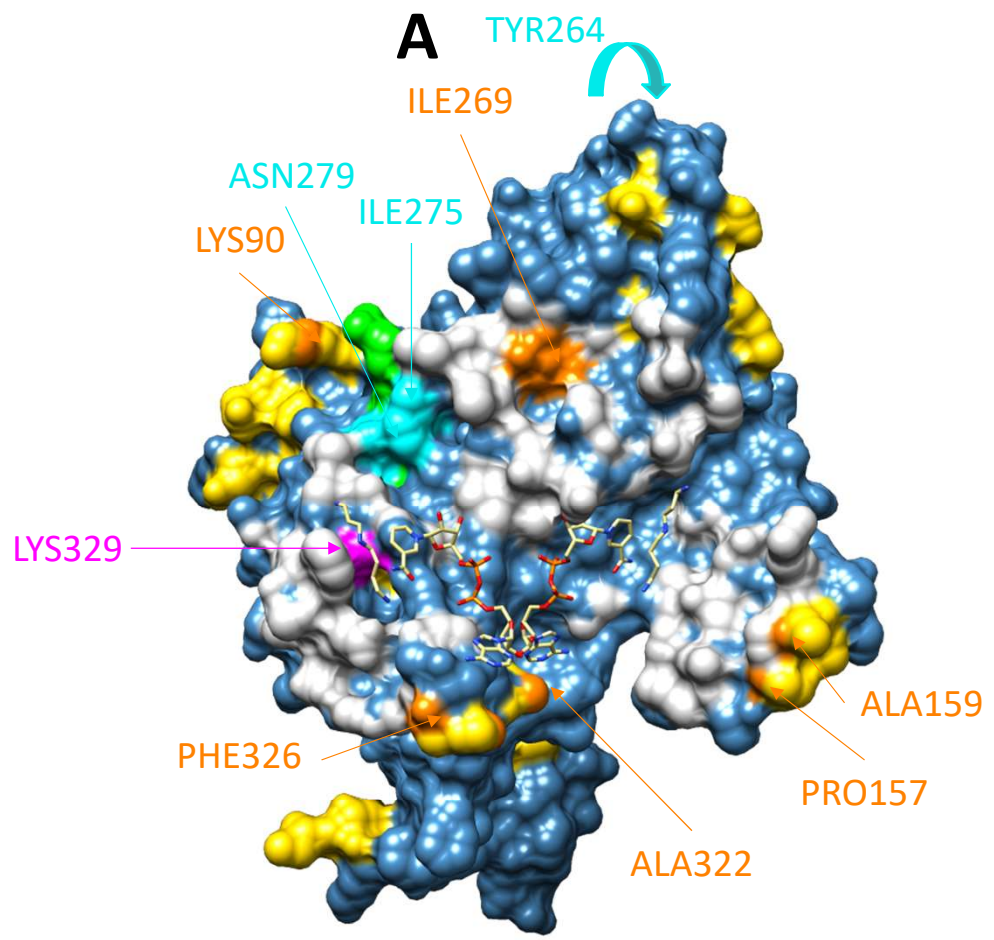

*Distimake quinquefolius* 1 DHS

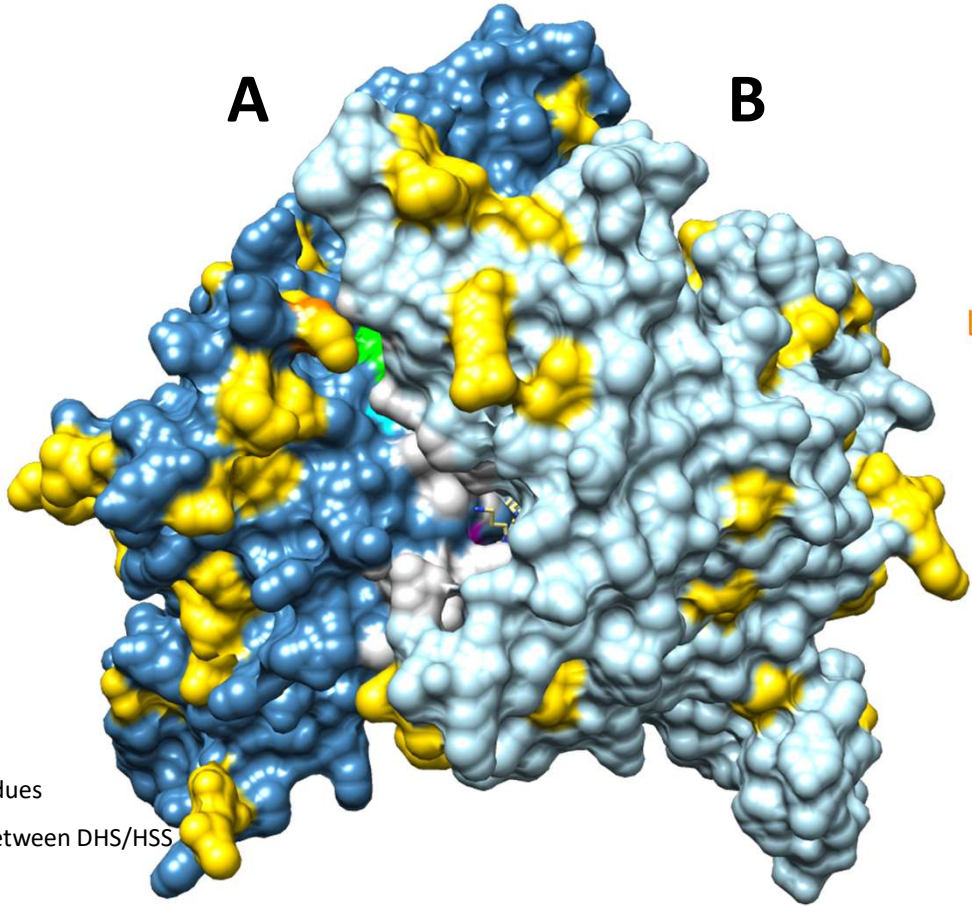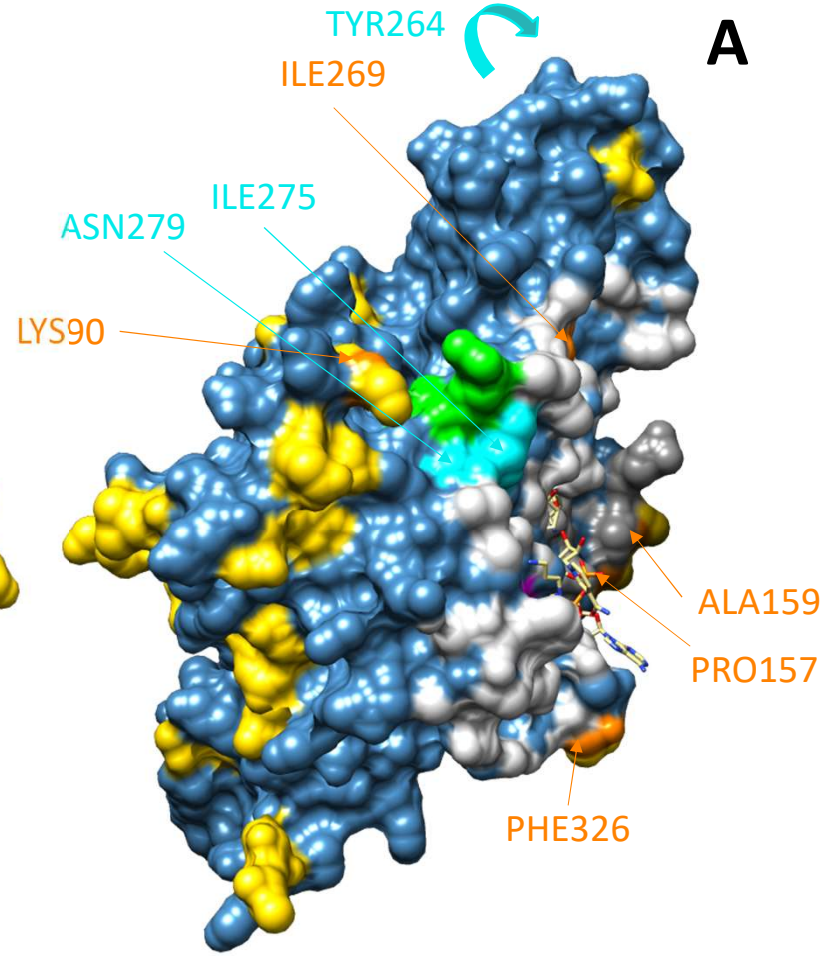

- grey interface residues
- yellow differences between DHS/HSS
- green RAM motif
- magenta catalytic lysine
- orange differences between DHS/HSS interface residues
- blue residues of extended HSS motif (if identical in DHS and HSS)
- cyan residues of extended HSS motif (if different in DHS and HSS)

*Distimake quinquefolius* 1 DHS

160°

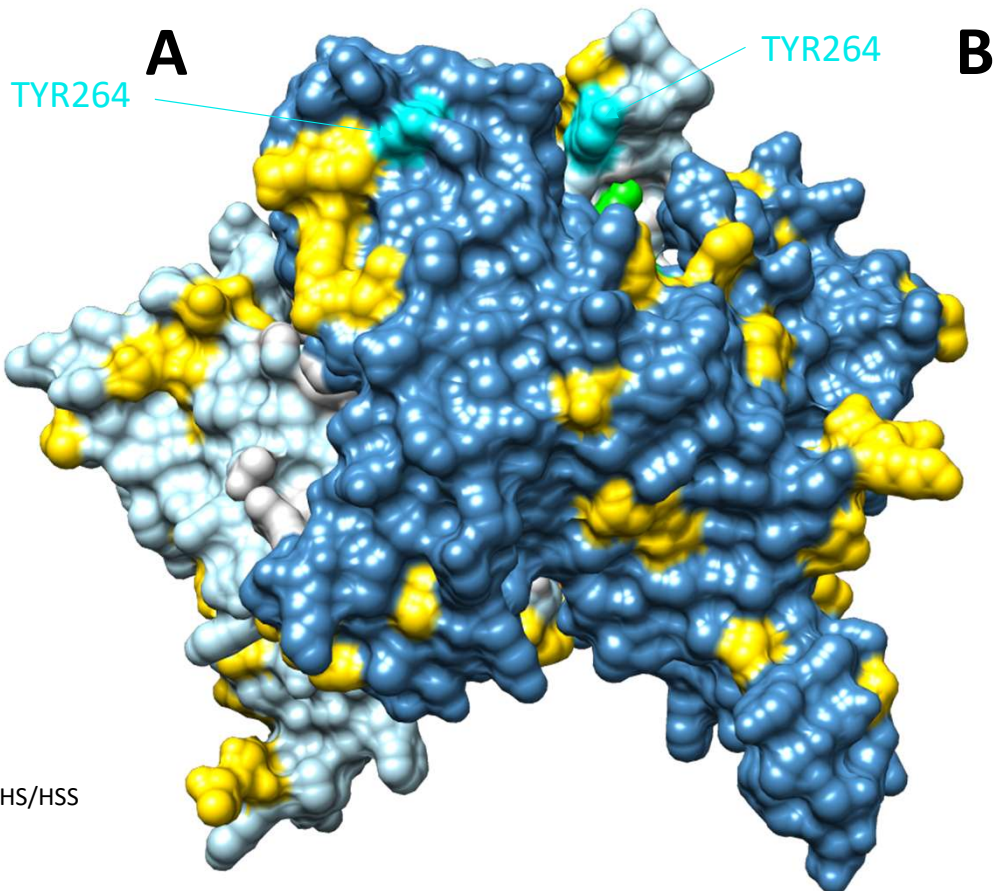

- interface residues
- differences between DHS/HSS
- RAM motif
- catalytic lysine
- differences between DHS/HSS interface residues
- residues of extended HSS motif (if identical in DHS and HSS)
- residues of extended HSS motif (if different in DHS and HSS)

*Distimake quinquefolius* 1 HSS

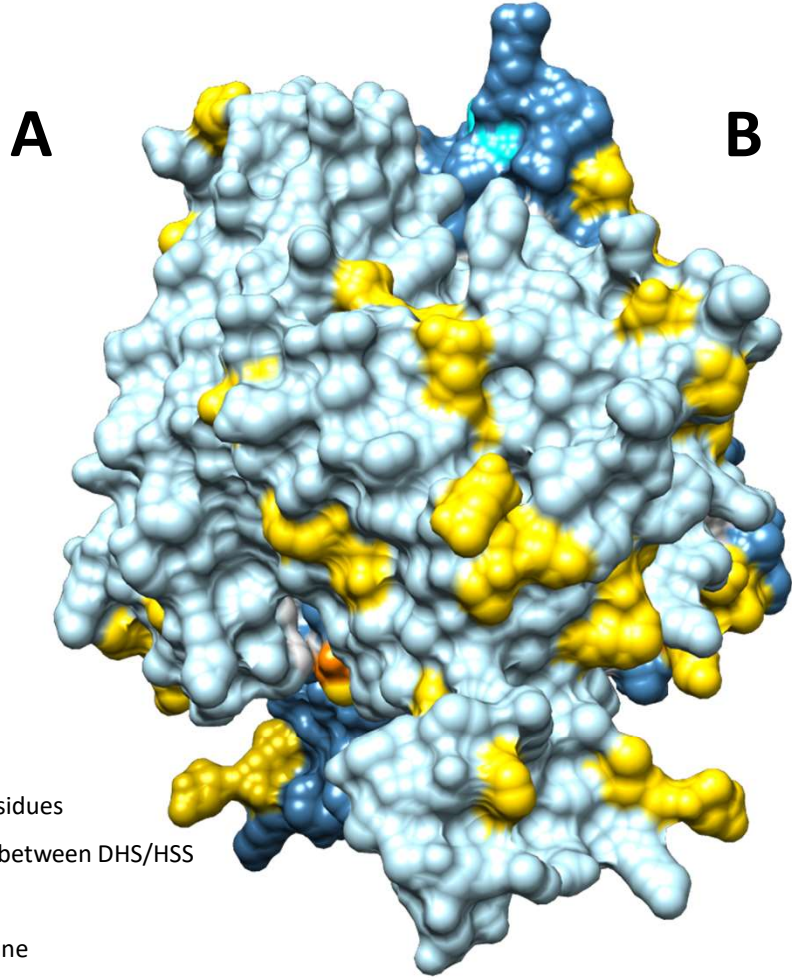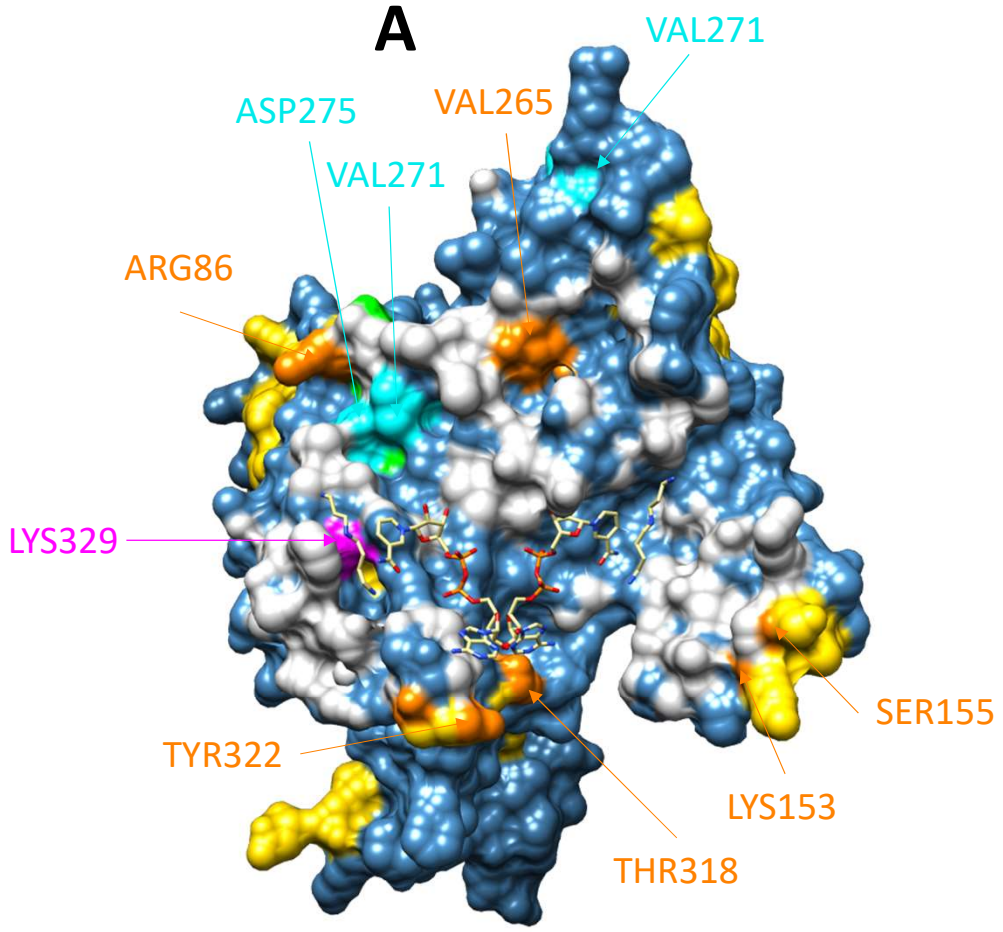

- interface residues
- differences between DHS/HSS
- RAM motif
- catalytic lysine
- differences between DHS/HSS interface residues
- residues of extended HSS motif (if identical in DHS and HSS)
- residues of extended HSS motif (if different in DHS and HSS)

## *Distimake quinquefolius* 1 HSS

| DHS                                        | HSS    |
|--------------------------------------------|--------|
| <b>interface residues &amp; different:</b> |        |
| Lys90                                      | Arg86  |
| Pro157                                     | Lys153 |
| Ala159                                     | Ser155 |
| Ile269                                     | Val265 |
| Ala322                                     | Thr318 |
| Phe326                                     | Tyr322 |
| <b>extended HSS motif:</b>                 |        |
| Tyr264                                     | His260 |
| Ile275                                     | Val271 |
| Asn279                                     | Asp275 |

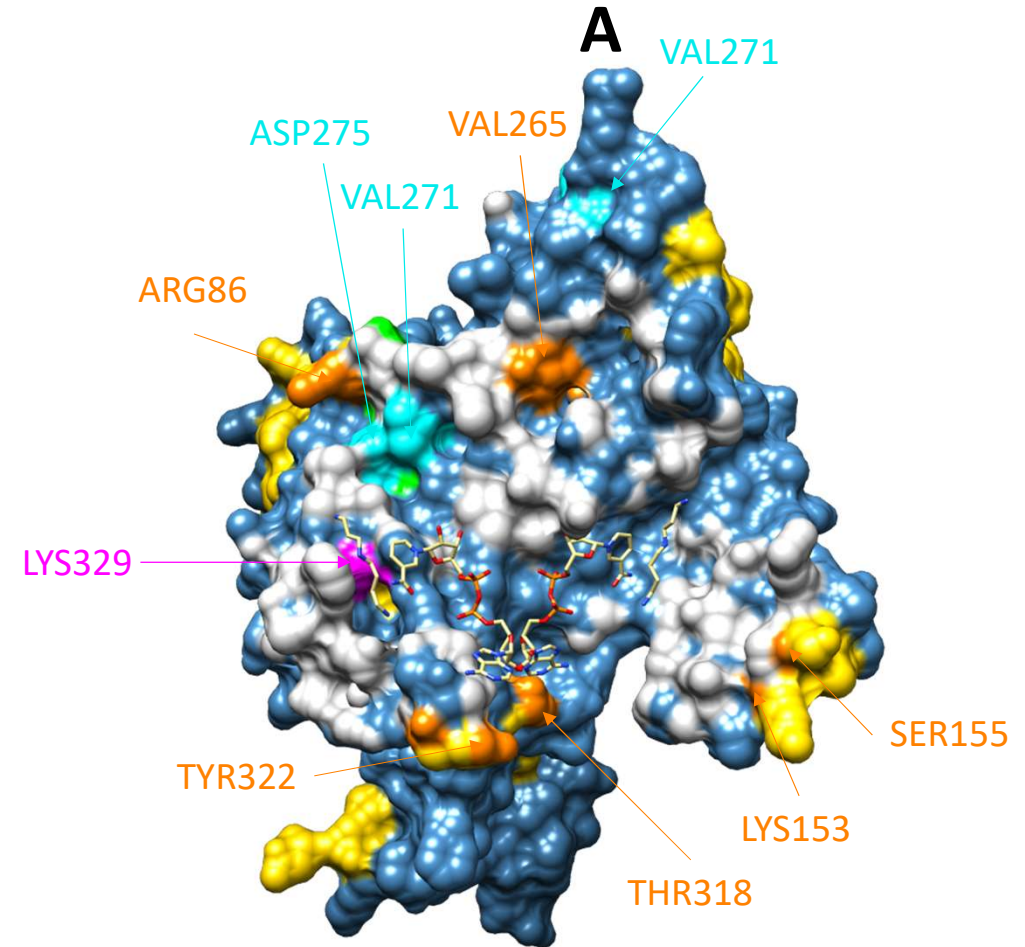

- interface residues
- differences between DHS/HSS
- RAM motif
- catalytic lysine
- differences between DHS/HSS interface residues
- residues of extended HSS motif (if identical in DHS and HSS)
- residues of extended HSS motif (if different in DHS and HSS)

*Distimake quinquefolius* 1 HSS

90°

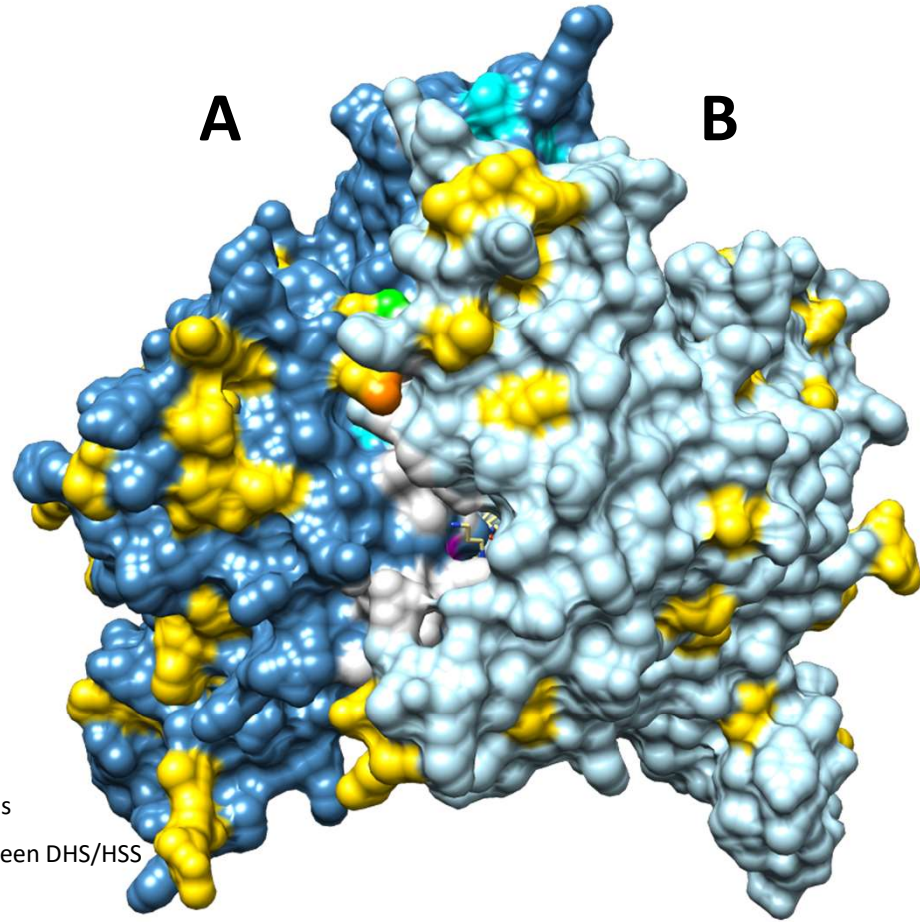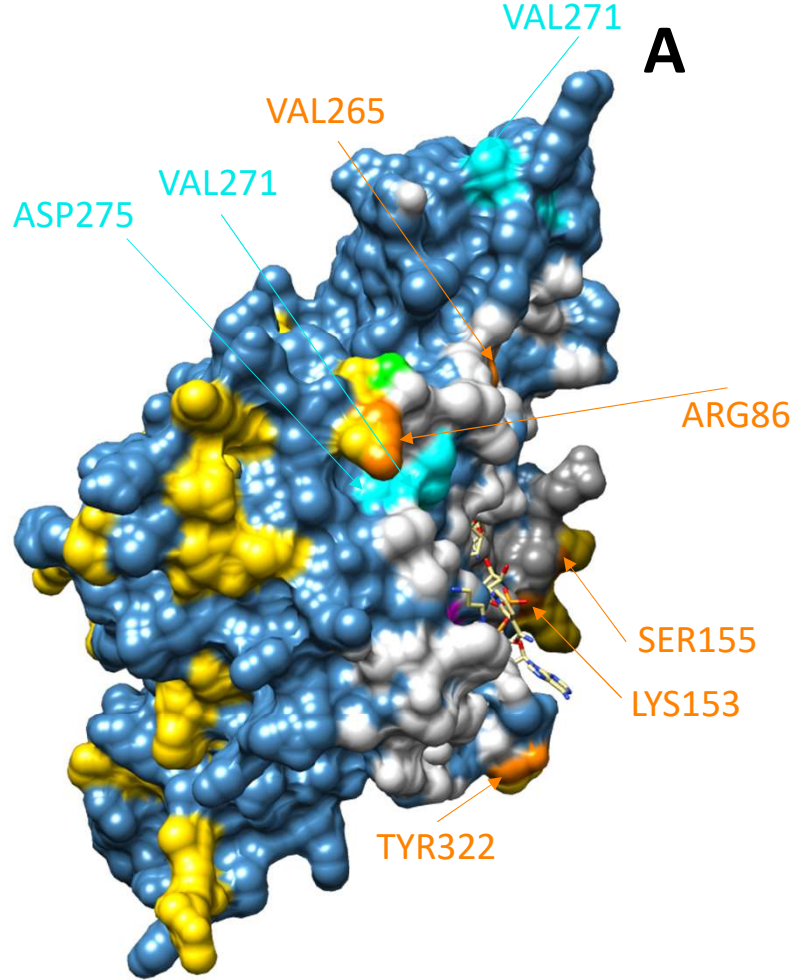

- interface residues
- differences between DHS/HSS
- RAM motif
- catalytic lysine
- differences between DHS/HSS interface residues
- residues of extended HSS motif (if identical in DHS and HSS)
- residues of extended HSS motif (if different in DHS and HSS)

*Distimake quinquefolius* 2 DHS

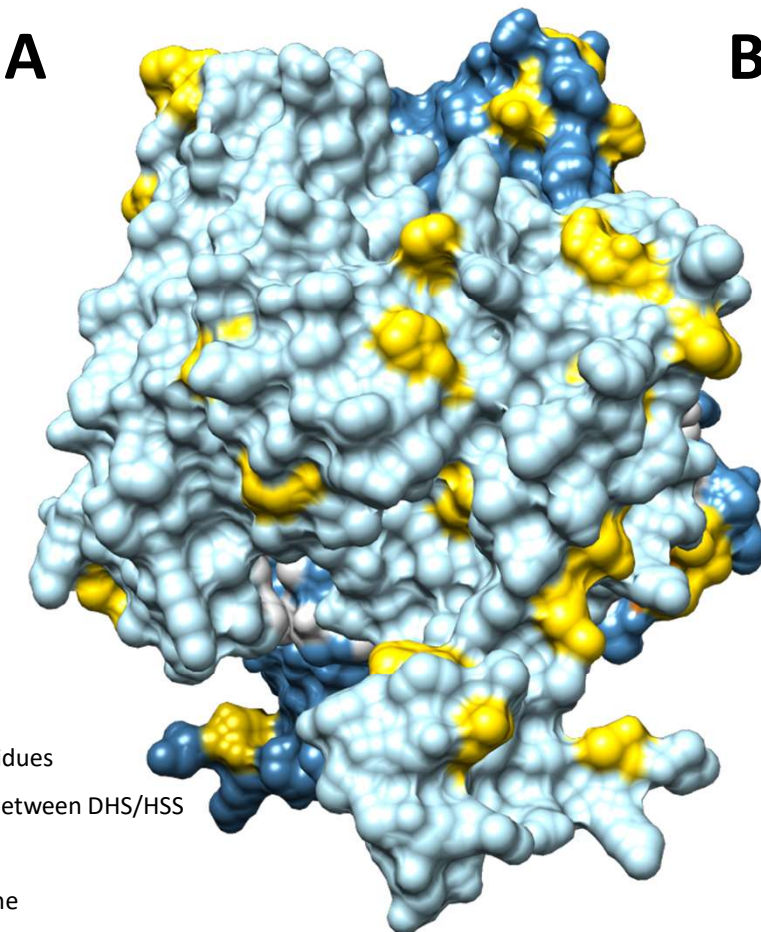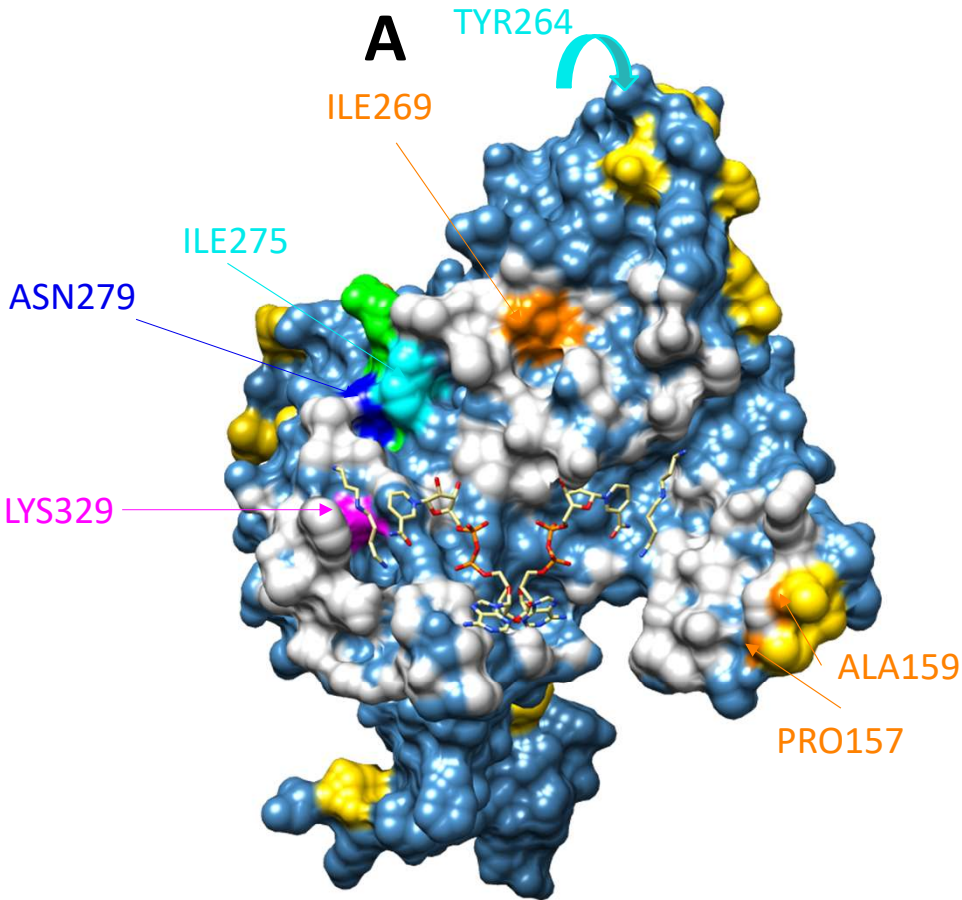

*Distimake quinquefolius* 2 DHS

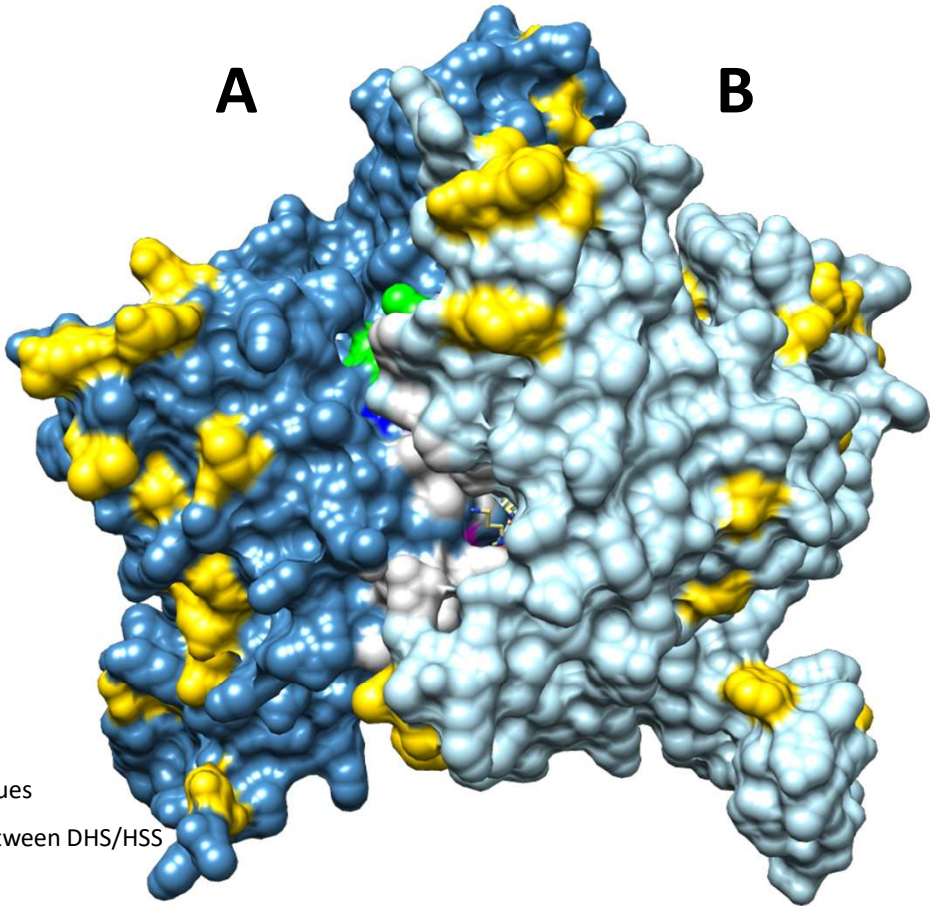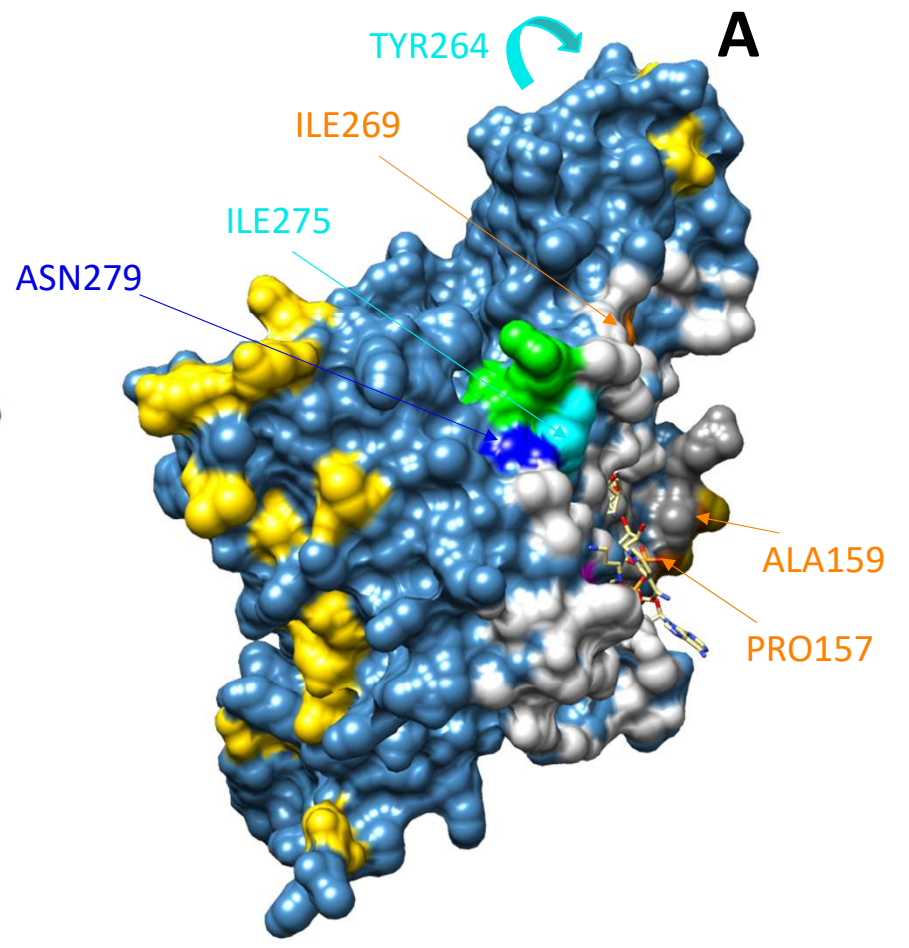

- interface residues
- differences between DHS/HSS
- RAM motif
- catalytic lysine
- differences between DHS/HSS interface residues
- residues of extended HSS motif (if identical in DHS and HSS)
- residues of extended HSS motif (if different in DHS and HSS)



*Distimake quinquefolius* 2 DHS

160°

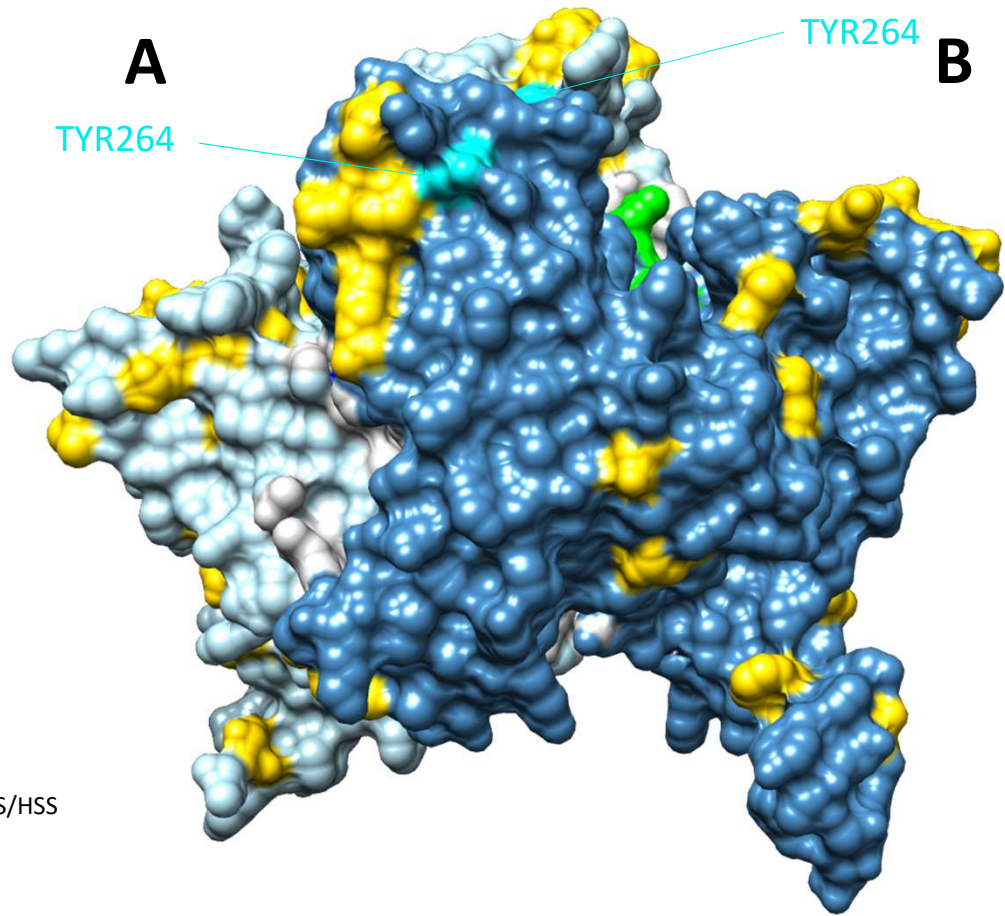

- interface residues
- differences between DHS/HSS
- RAM motif
- catalytic lysine
- differences between DHS/HSS interface residues
- residues of extended HSS motif (if identical in DHS and HSS)
- residues of extended HSS motif (if different in DHS and HSS)

*Distimake quinquefolius* 2 HSS

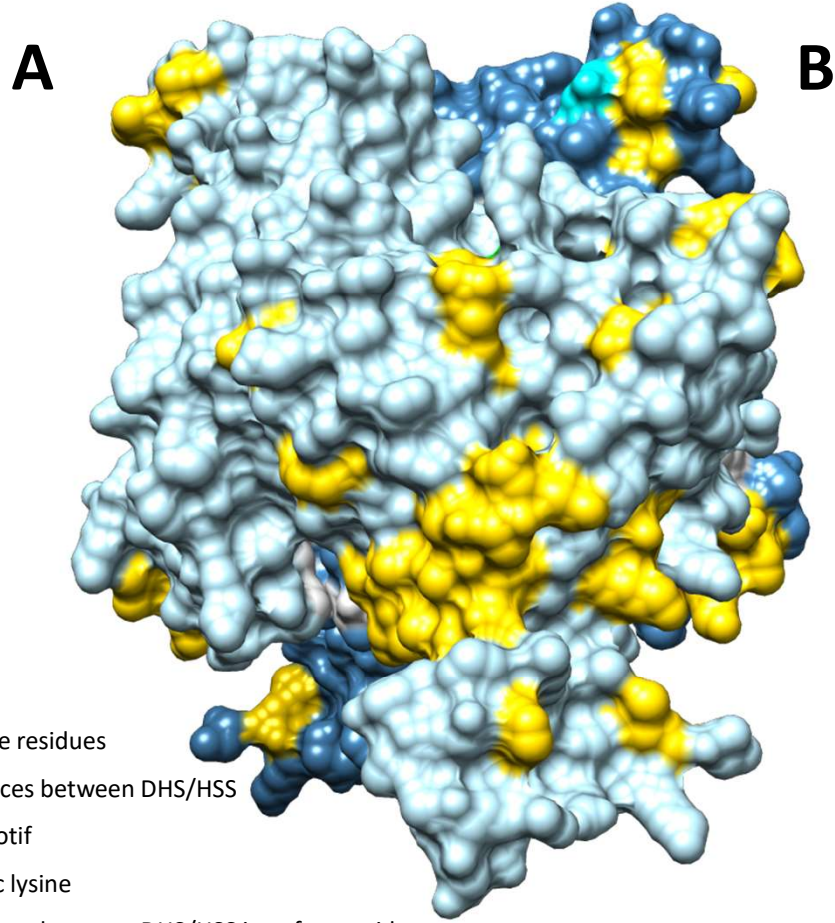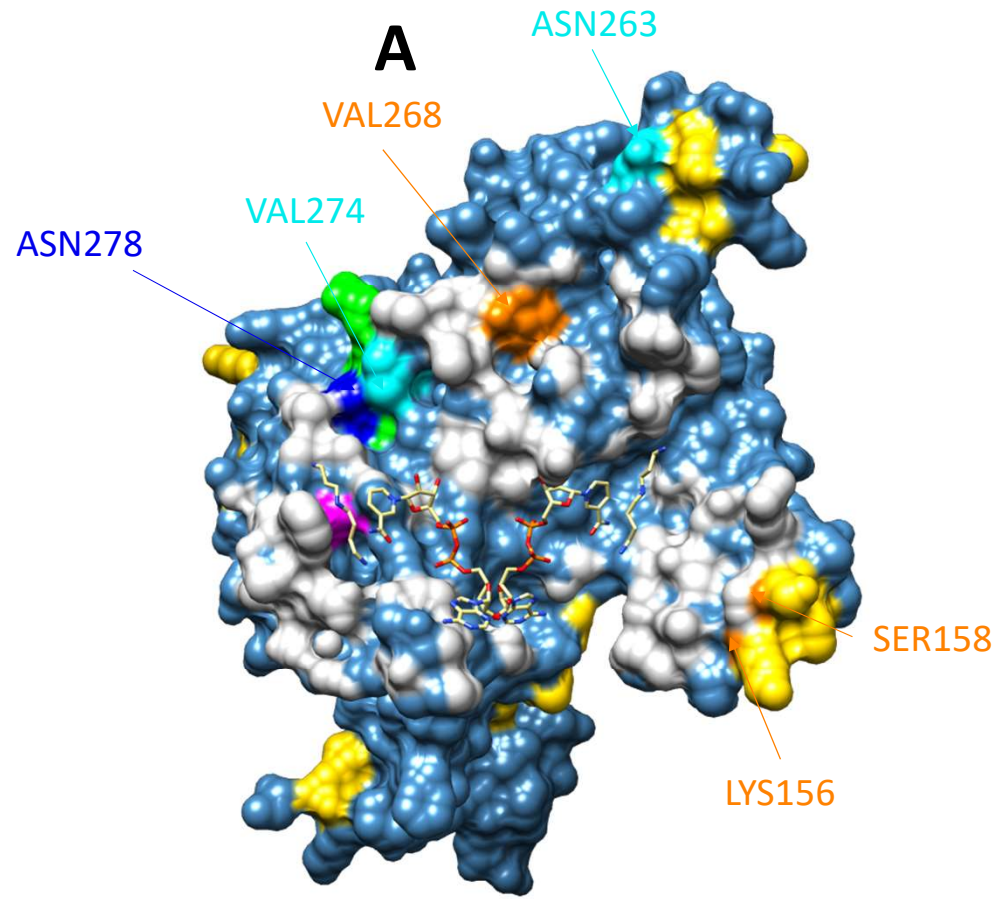

- interface residues
- differences between DHS/HSS
- RAM motif
- catalytic lysine
- differences between DHS/HSS interface residues
- residues of extended HSS motif (if identical in DHS and HSS)
- residues of extended HSS motif (if different in DHS and HSS)

*Distimake quinquefolius* 2 HSS

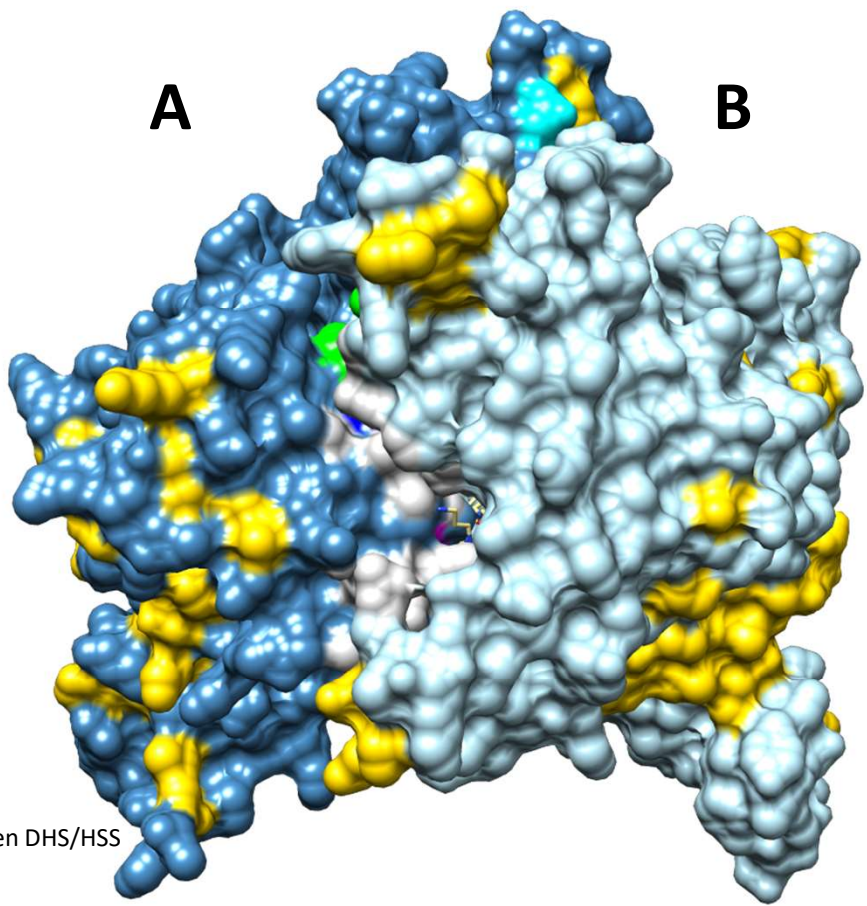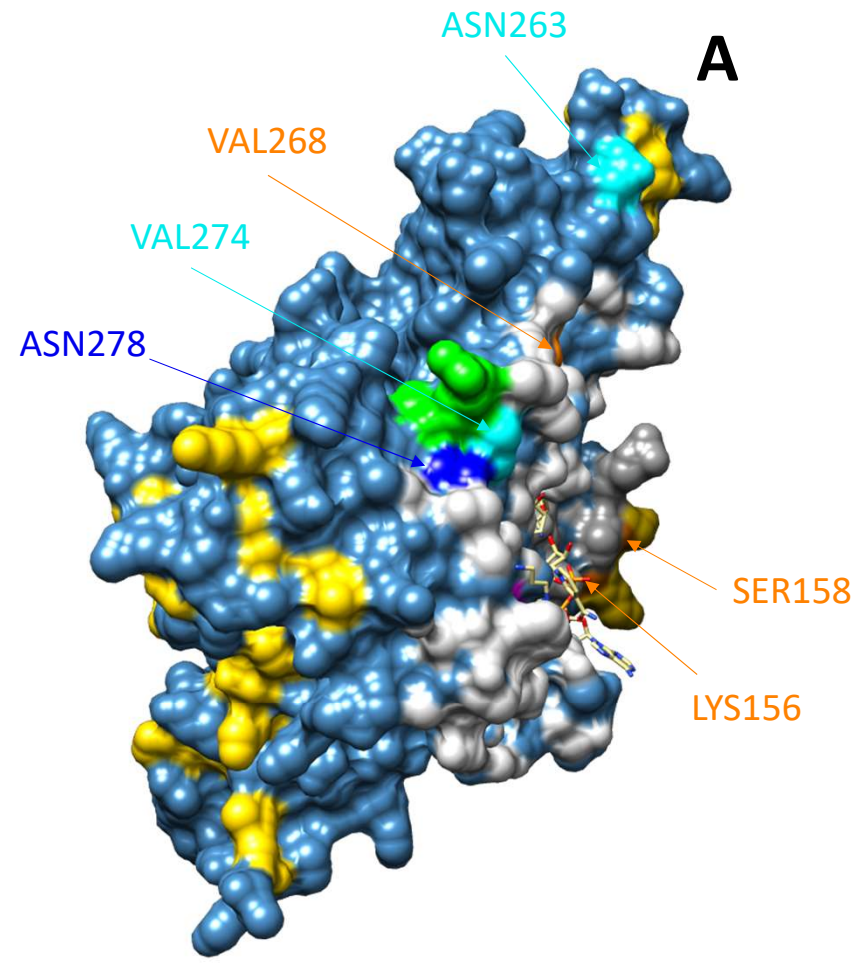

- interface residues
- differences between DHS/HSS
- RAM motif
- catalytic lysine
- differences between DHS/HSS interface residues
- residues of extended HSS motif (if identical in DHS and HSS)
- residues of extended HSS motif (if different in DHS and HSS)
