# Supplementary material for: The long road of functional recruitment—The evolution of a gene duplicate to pyrrolizidine alkaloid biosynthesis in the morning glories (Convolvulaceae)
Source: PubMed Central journal article supplement — Plant Direct. 2022 Jul 19;6(7):e420. doi: 10.1002/pld3.420 (PMC9295680; doi:10.1002/pld3.420), 2022-07-19
Supplement: PLD3-6-e420-s004.pdf [file PLD3-6-e420-s004.pdf]

- |   |                                                                     |
|---|---------------------------------------------------------------------|
|   | Lys329, to which the butylamine moiety of spermidine is transferred |
| N | Amino acids, that form hydrogen bonds to NAD                        |
| N | Amino acids with hydrophobic interactions with NAD                  |
| S | Amino acids, that form hydrogen bonds to spermidine                 |
| S | Amino acids with hydrophobic interactions with spermidine           |

## Census Identity

man DHS (1RLZ:A|PDBID|CHAIN|SEQUENCE)

*S. Nicotiana tabacum* M G E A L N V M E S V R S I V F K E S E N L E G S

*S. Solanum lycopersicum* M G F A I K Y - - S I M D S V R S V V E K F S E N I F G S

*S. Cuscuta australis* M R E V D D Y Y E K K S S L D S A

Angioid nucleus

*Stipombe batatas* M G E A I R D Q N R V M D A V R A I V F K K S E S L D G G

5 *Ipomoea trinda* M G E A S R D Q N R V M D A V R A T V F K K S E S L D G G

HS *Ipomoea triloba* M G E A S R D Q N R V M D A V R A T V F K K S E S L D G G

HS *Ipomoea alba* M G E D T R D Q N R V M D A V R A T V F K K S E S L D G G

HS *Ipomoea neei* M G E D T R D Q N R V M D A V R A T V F K K S E S L D G G

HS *Distimake tuberosus*

HS *Distimake guinauefolius* 2 M G F A T R D Q N R V M D A V R A T V E K K S F S I D G G

HS *Dictyosphaera guineensis* 1

M G L A T S D E N K A M D J A H A A V F R R S L S L L G S V

SS *Ipomoea triloba* M G E A I G D E N R A M D S A H A A V F K K S E S L E G S

ss *Ipomoea alba* M G E A I K D E N K A L G S A H A A V F K K S E S L E G -

SS *Ipomoea neei* M G E A I K D E N G A L G C A H A A V F K K S E S L D G -

SS *Distimake tuberosus*

SS *Distimake quinquefolius* 2 M G E A I R K Q N S A M D S A H A A V F K K S E S L D G -

SS *Distimake quinquefolius* 1 M G E V F - - - N G A M D S A R A A V F K K S E S L D G N
