# Supplementary figures and images for: The long road of functional recruitment—The evolution of a gene duplicate to pyrrolizidine alkaloid biosynthesis in the morning glories (Convolvulaceae)
Source: PubMed Central journal article supplement — Plant Direct. 2022 Jul 19;6(7):e420. doi: 10.1002/pld3.420 (PMC9295680; doi:10.1002/pld3.420), 2022-07-19

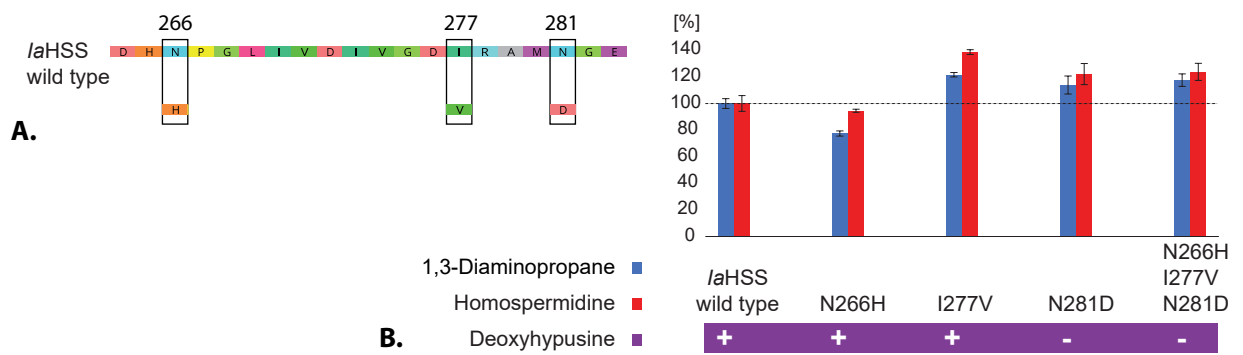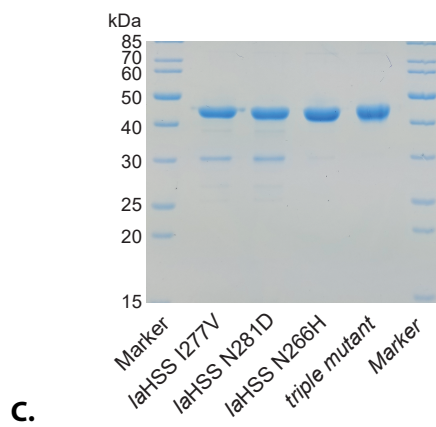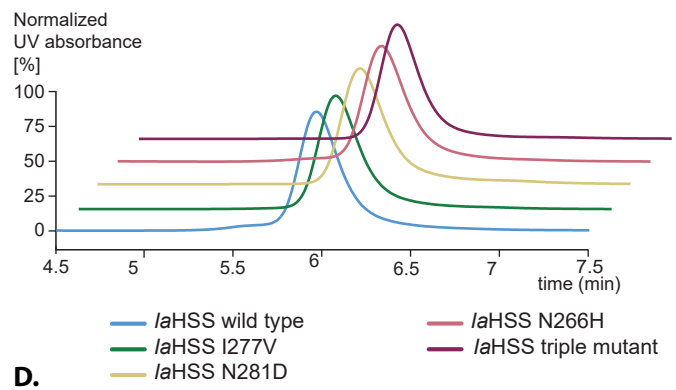

Supplement: PLD3-6-e420-s001.pdf [file PLD3-6-e420-s001.pdf]
